# Supplementary material for: Palladium-catalyzed dehydrogenative coupling of cyclic enones with thiophenes: a rapid access to β-heteroarylated cyclic enones
Source: Royal Society of Chemistry journal article supplement (doi:10.1039/c8cc01059e), 2018-01-01

---

# **Palladium Catalyzed Dehydrogenative Coupling of Cyclic Enones with Thiophenes: A Rapid Access to $\beta$ -Heteroarylated Cyclic Enones**

Zhen-Kang Wen, <sup>\*,†</sup> Ting-Ting Song<sup>†</sup>, Yu-Fang Liu<sup>†</sup> and Jian-Bin Chao<sup>‡</sup>

<sup>†</sup>School of Chemistry and Chemical Engineering, Shanxi University, Taiyuan 030006, China

<sup>‡</sup>Scientific Instrument Center, Shanxi University, Taiyuan 030006, China

E-mail: zkwen@sxu.edu.cn

## **Supporting information**

|                                                                                                           |             |
|-----------------------------------------------------------------------------------------------------------|-------------|
| <b>Table of Contents .....</b>                                                                            | <b>Page</b> |
| <b>General methods .....</b>                                                                              | <b>2</b>    |
| <b>Optimization of Reaction Conditions .....</b>                                                          | <b>3</b>    |
| <b>Competing Kinetic Isotope Effect (KIE) Experiment .....</b>                                            | <b>4</b>    |
| <b>General Procedure for the Synthesis of thiophene homologues...</b>                                     | <b>5</b>    |
| <b>Characterization data for the substituted thiophenes.....</b>                                          | <b>6</b>    |
| <b>General procedure for the palladium-catalyzed cross-coupling of thiophenes with cyclic enones.....</b> | <b>9</b>    |
| <b>Characterization data for the products .....</b>                                                       | <b>10</b>   |
| <b>General procedure for the palladium-catalyzed dehydrogenation</b>                                      |             |

---

|                                                                                         |           |
|-----------------------------------------------------------------------------------------|-----------|
| <b>of <math>\beta</math>-thiophene-substituted cyclohexenone to <i>meta</i>-phenol</b>  |           |
| <b>derivatives .....</b>                                                                | <b>23</b> |
| <b>Characterization data for the products .....</b>                                     | <b>23</b> |
| <b>Reference .....</b>                                                                  | <b>26</b> |
| <b>Copy of <math>^1\text{H}</math> NMR, <math>^{13}\text{C}</math> NMR Spectra.....</b> | <b>28</b> |

## **General methods**

Unless otherwise noted, all chemicals were purchased from commercial suppliers and used without further purification. Column chromatography purifications were performed using 200–300 mesh silica gel. Commercial grade solvents and reagents were used without further purification. Experiments involving moisture and/or air sensitive components were performed in oven-dried glassware under a positive pressure of nitrogen using freshly distilled solvents. Analytical thin layer chromatography (TLC) was performed using Merck 60 F254 pre-coated silica gel plate (0.2 mm thickness). Subsequent to elution, plates were visualized using UV radiation (254 nm) on Spectroline Model ENF-24061/F 254 nm. Further visualization was possible by staining with basic solution of potassium permanganate or acidic solution of ceric molybdate. Flash chromatography was performed using 200-300 mesh silica gel with the

indicated solvent system. Columns were typically packed as slurry and equilibrated with the appropriate solvent system prior to use. High resolution mass spectral analysis (HRMS) was performed on an AB SCIEX TripleTOF 5600 Instruments.  $^1\text{H}$  NMR and  $^{13}\text{C}$  NMR experiments were performed with a BRUKER AVANCE III HD 600 MHz and 151 MHz NMR spectrometer, respectively (Bruker, Billerica, MA). Chemical shifts for  $^1\text{H}$  NMR spectra are reported as  $\delta$  in units of parts per million (ppm) downfield from  $\text{SiMe}_4$  ( $\delta$  0.0) and relative to the signal of chloroform-*d* ( $\delta$  7.2600, singlet). Multiplicities were given as: s (singlet); d (doublet); t (triplet); q (quartet); dd (doublets of doublet); dt (doublets of triplet); or m (multiplets). The number of protons (n) for a given resonance is indicated by nH. Coupling constants are reported as a *J* value in Hz. Carbon nuclear magnetic resonance spectra ( $^{13}\text{C}$  NMR) are reported as  $\delta$  in units of parts per million (ppm) downfield from  $\text{SiMe}_4$  ( $\delta$  0.0) and relative to the signal of chloroform-*d* ( $\delta$  77.0, triplet).

### Optimization of Reaction Conditions

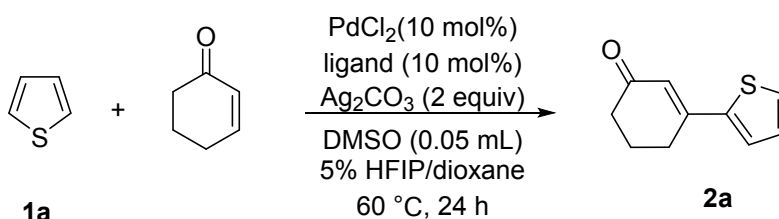

Screening of amino acid ligands effect of the reaction.<sup>a</sup>

| entry          | ligand    | yield/% |
|----------------|-----------|---------|
| 1              | Ac-Gly-OH | 64%     |
| 2              | Ac-Leu-OH | 56%     |
| 3              | Ac-Val-OH | 54%     |
| 4              | Ac-Ile-OH | 50%     |
| 5              | Ac-Phe-OH | 48%     |
| 6 <sup>b</sup> | Ac-Gly-OH | 0       |
| 7 <sup>c</sup> | -         | 0       |

<sup>a</sup> General conditions: **1a** (0.25 mmol), cyclohexenone (3.0 equiv), amino acid ligand (10 mol%), Pd(OAc)<sub>2</sub> (10 mol%), HFIP:1,4-dioxane =1:20 (0.05mL, 1 mL), 60 °C, 24 h. The yields indicated were determined upon isolation. <sup>b</sup>in the absence of PdCl<sub>2</sub> <sup>c</sup>in the absence of Ac-Gly-OH.

### Competing Kinetic Isotope Effect (KIE) Experiment

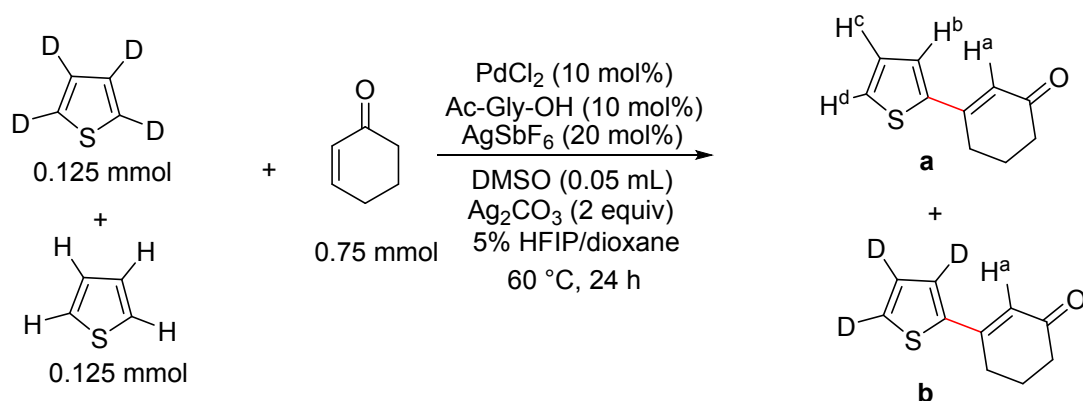

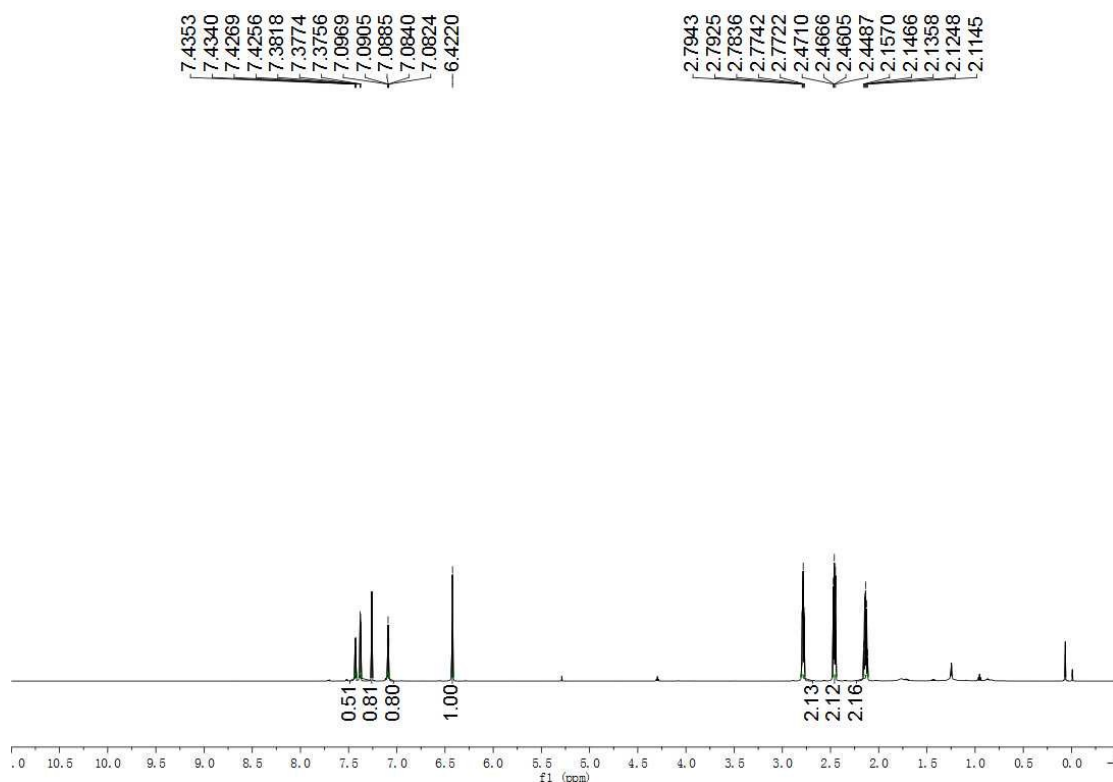

<sup>1</sup>H NMR spectra of the mixture of compound **a** and **b**

**Note:** The value of  $k_H/k_D$  was calculated from the <sup>1</sup>H NMR spectra above which should be the mixture of compound **a** and **b** (the KIE scheme). The compound **a** was integrated as 0.8 (since the H<sup>b</sup> and H<sup>c</sup> was integrated as 0.8). Therefore, the compound **b** was integrated as 0.2 (since the mixed H<sup>a</sup> of compound **a** and **b** with chemical shift 6.422 (s, 1H) was integrated as 1.0, so 1.0-0.8 = 0.2). Therefore,  $k_H/k_D = 0.8/(1.0-0.8) = 4$ .

### General Procedure for the Synthesis of thiophene homologues.

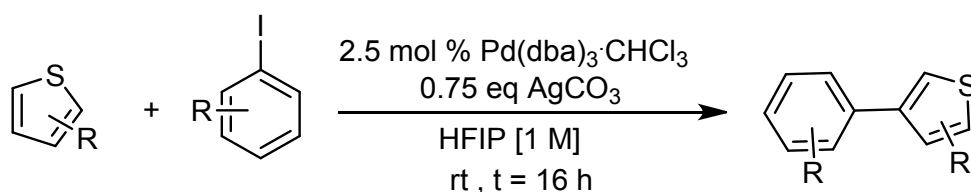

Thiophene homologues was synthesized according to the procedure of

Larrosa *et al.*<sup>1</sup> Thiophene homologues (2 mmol), Pd<sub>2</sub>(dba)<sub>3</sub>·CHCl<sub>3</sub> (51.8 mg, 0.05 mmol, 0.025 equiv), silver carbonate (413.6 mg, 1.5 mmol, 0.75 equiv), aryl iodide (3 mmol, 1.5 equiv) and were stirred in hexafluoro-2-propanol (2 mL) at room temperature for 16 h. After this time, the resultant mixture was diluted with EtOAc (5 mL) and filtered through a plug of silica. The silica plug was flushed with EtOAc (30 mL) and the filtrate was evaporated to dryness under reduced pressure. The crude product was purified by column chromatography to give the corresponding product.

### Characterization data for the substituted thiophenes

#### 2-methyl-4-phenylthiophene (**1o**)

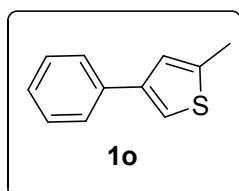

The product **1o** was obtained via general procedure using 2-methylthiophene (0.194 mL, 2 mmol) and iodobenzene (0.334 mL, 3 mmol, 1.5 equiv) and

isolated by column chromatography as a white solid in 70% yield (244 mg).

R<sub>f</sub> (hexane): 0.65; <sup>1</sup>H NMR (600 MHz, CDCl<sub>3</sub>) δ 7.58 (d, *J* = 7.5 Hz, 2H), 7.40 (t, *J* = 7.4 Hz, 2H), 7.29 (t, *J* = 7.2 Hz, 1H), 7.22 (s, 1H), 7.08 (s, 1H), 2.55 (s, 3H); <sup>13</sup>C NMR (151 MHz, CDCl<sub>3</sub>) δ 142.05, 140.49, 136.12, 128.71, 126.92, 126.23, 124.62, 118.00, 15.43. This data is in accordance with the reported literature.<sup>2</sup>

### 2-methyl-4-(*o*-tolyl)thiophene (**1p**)

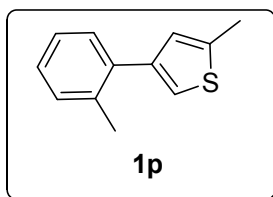

The product **1p** was obtained via general procedure using 2-methylthiophene (0.194 mL, 2 mmol) and 1-iodo-2-methylbenzene (0.382 mL, 3 mmol, 1.5 equiv) and isolated by column chromatography as a colorless oil in 68% yield (256 mg).

R<sub>f</sub> (hexane): 0.70; <sup>1</sup>H NMR (600 MHz, CDCl<sub>3</sub>) δ 7.28 – 7.26 (m, 1H), 7.24 – 7.17 (m, 3H), 6.93 (s, 1H), 6.80 (s, 1H), 2.51 (s, 3H), 2.34 (s, 3H); <sup>13</sup>C NMR (151 MHz, CDCl<sub>3</sub>) δ 142.01, 139.08, 136.91, 135.59, 130.39, 129.59, 127.20, 127.11, 125.71, 120.33, 20.77, 15.30; HRMS (ESI) *m/z* calculated for C<sub>12</sub>H<sub>13</sub>S [M+H]<sup>+</sup>: 189.0732, found 189.0732.

### 2,4-diphenylthiophene (**1q**)

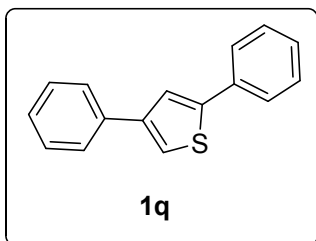

The product **1q** was obtained via general procedure using 2-phenylthiophene **1h** (320.5 mg, 2 mmol) and iodobenzene (0.334 mL, 3 mmol, 1.5 equiv) and isolated by column chromatography as a white solid in 45% yield (214 mg).

R<sub>f</sub> (hexane): 0.55; <sup>1</sup>H NMR (600 MHz, CDCl<sub>3</sub>) δ 7.67-7.61 (m, *J* = 21.7, 9.3 Hz, 4H), 7.60 (d, *J* = 1.0 Hz, 1H), 7.44-7.38 (m, 5H), 7.31 (dd, *J* = 15.2, 5.8 Hz, 2H). the data is in accordance with the reported literature.<sup>3</sup>

### 2-phenyl-4-(*o*-tolyl)thiophene (**1r**)

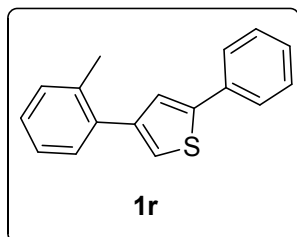

The product **1r** was obtained via general procedure using 2-phenylthiophene (320.5 mg, 2 mmol) and 1-iodo-2-methylbenzene (0.382 mL, 3 mmol, 1.5 equiv) and isolated by column chromatography as a colorless oil in 54% yield (269 mg).

R<sub>f</sub> (hexane): 0.50; <sup>1</sup>H NMR (600 MHz, CDCl<sub>3</sub>) δ 7.67-7.65 (m, 2H), 7.40 (t, *J* = 9.1, 7.6 Hz, 4H), 7.33-7.26 (m, 4H), 7.17 (s, 1H), 2.42 (s, 3H); <sup>13</sup>C NMR (151 MHz, CDCl<sub>3</sub>) δ 143.80, 143.07, 136.58, 135.66, 134.34, 130.49, 129.59, 128.90, 127.55, 127.43, 127.40, 125.81, 124.99, 122.07, 20.77; HRMS (ESI) *m/z* calculated for C<sub>17</sub>H<sub>15</sub>S [M+H]<sup>+</sup>: 251.0889, found 251.0892.

### 3-methyl-4-phenylthiophene (**1s**)

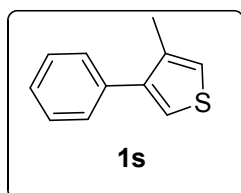

The product **1s** was obtained via general procedure using 3-methylthiophene (0.193 mL, 2 mmol) and iodobenzene (0.334 mL, 3 mol, 1.5 equiv) and isolated by column chromatography as a colorless oil in 76% yield (265 mg).

R<sub>f</sub> (hexane): 0.65; <sup>1</sup>H NMR (600 MHz, CDCl<sub>3</sub>) δ 7.43 (d, *J* = 5.6 Hz, 4H), 7.37-7.34 (m, 1H), 7.22 (d, *J* = 3.1 Hz, 1H), 7.04 (s, 1H), 2.30 (s, 3H); <sup>13</sup>C NMR (151 MHz, CDCl<sub>3</sub>) δ 143.11, 137.07, 136.13, 128.60, 128.28, 126.94, 122.93, 121.96, 15.51. The data is in accordance with the literature.<sup>4</sup>



### 3-methyl-4-(o-tolyl)thiophene (**1t**)

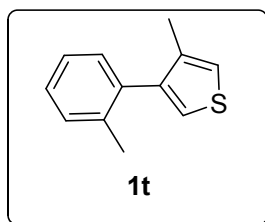

The product **1t** was obtained via general procedure using 3-methylthiophene (0.193 mL, 2 mmol) and 1-iodo-2-methylbenzene (0.382 mL, 3 mmol, 1.5 equiv) and isolated by column chromatography as a colorless oil in 57% yield (216 mg).

R<sub>f</sub> (hexane): 0.65; <sup>1</sup>H NMR (600 MHz, CDCl<sub>3</sub>) δ 7.27 (d, *J* = 4.1 Hz, 2H), 7.22 (dt, *J* = 8.2, 4.3 Hz, 1H), 7.16 (d, *J* = 7.5 Hz, 1H), 7.05 (d, *J* = 2.7 Hz, 1H), 7.02 (s, 1H), 2.15 (s, 3H), 2.03 (s, 3H); <sup>13</sup>C NMR (151 MHz, CDCl<sub>3</sub>) δ 142.73, 137.01, 136.87, 136.81, 130.03, 129.86, 127.45, 125.41, 122.58, 120.84, 19.93, 14.74. The data is in accordance with the literature.<sup>4</sup>

### General procedure for the palladium-catalyzed cross-coupling of thiophenes with cyclic enones.

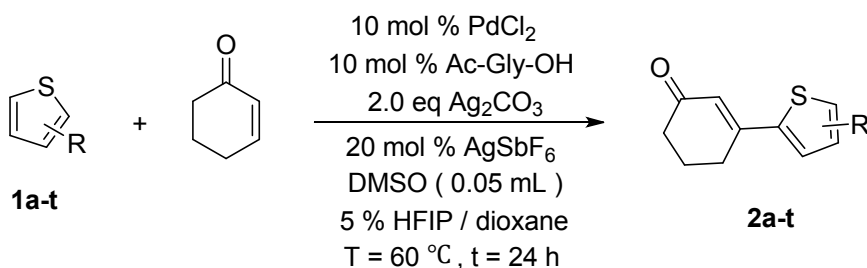

A 10 mL reaction tube equipped with a magnetic stirring bar was added thiophene derivative (0.25 mmol), PdCl<sub>2</sub> (0.025 mmol, 10 mol%), silver carbonate (0.75 mmol, 2 equiv), Ac-Gly-OH (0.025 mmol, 10 mol%), AgSbF<sub>6</sub> (0.05 mmol, 20 mol%), DMSO (0.05 mL), and 2-cyclohexen-1-one (0.75 mmol, 3.0 equiv) in 5% HFIP / 1,4-Dioxane (v/v, 1 mL) at 60

°C for 24 h. The reaction mixture was cooled to room temperature, followed by the addition of water and ethyl acetate. The organic layer was separated and the aqueous layer was extracted with ethyl acetate (3 × 10 mL). The combined organic layer was washed with brine and dried over anhydrous Na<sub>2</sub>SO<sub>4</sub>, filtrated and concentrated in *vacuo*, the residue was purified through column chromatography on silica gel to give the desired products.

### Characterization data for the products

#### 3-(thiophen-2-yl)cyclohex-2-enone (2a)

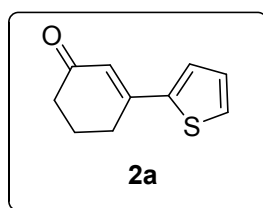

This compound was prepared by the general procedure described above and was obtained as a yellow oil (28.6 mg) in 64% yield.

R<sub>f</sub> (hexane:EtOAc = 5:1): 0.40; <sup>1</sup>H NMR (600 MHz, CDCl<sub>3</sub>) δ 7.42 (d, *J* = 5.1 Hz, 1H), 7.37 (d, *J* = 3.7 Hz, 1H), 7.10-7.05 (m, 1H), 6.41 (s, 1H), 2.77 (t, *J* = 6.0 Hz, 2H), 2.48-2.42 (m, 2H), 2.15-2.09 (m, 2H); <sup>13</sup>C NMR (151 MHz, CDCl<sub>3</sub>) δ 199.39, 152.38, 142.70, 128.71, 128.22, 127.28, 122.68, 37.19, 27.96, 22.39; HRMS (ESI) *m/z* calculated for C<sub>10</sub>H<sub>11</sub>OS [M+H]<sup>+</sup>: 179.0525, found 179.0525. the data is in accordance with the literature.<sup>5</sup>

#### 3-(5-methylthiophen-2-yl)cyclohex-2-enone (2b)

This compound was prepared by the general procedure described above

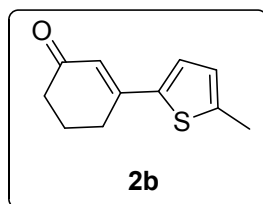

and was obtained as a yellow oil (32.6 mg) in 68% yield.

R<sub>f</sub> (hexane:EtOAc = 5:1): 0.45; <sup>1</sup>H NMR (600 MHz, CDCl<sub>3</sub>) δ 7.15 (s, 1H), 6.71 (d, *J* = 0.9 Hz, 1H), 6.26 (s, 1H), 2.70 (t, *J* = 6.0 Hz, 2H), 2.45 (s, 3H), 2.39 (dd, *J* = 9.4, 3.8 Hz, 2H), 2.08-2.04 (m, 2H); <sup>13</sup>C NMR (151 MHz, CDCl<sub>3</sub>) δ 199.19, 152.56, 144.19, 140.13, 127.80, 126.61, 121.51, 37.07, 27.38, 22.27, 15.59; HRMS (ESI) *m/z* calculated for C<sub>11</sub>H<sub>13</sub>OS [M+H]<sup>+</sup>: 193.0682, found 193.0681.

### 3-(4-methylthiophen-2-yl)cyclohex-2-enone (2ca)

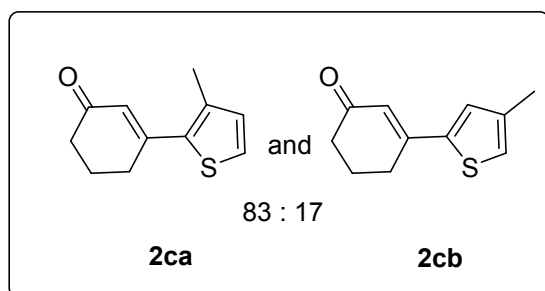

This compound was prepared by the general procedure described above and was obtained as a yellow oil (33.6 mg) of inseparable

mixture (**2ca/2ccb** = 83:17) in 70% yield.

R<sub>f</sub> (hexane:EtOAc = 5:1): 0.45; <sup>1</sup>H and <sup>13</sup>C NMR are described for the **2ca** isomer: <sup>1</sup>H NMR (600 MHz, CDCl<sub>3</sub>) δ 7.30 (d, *J* = 5.1 Hz, 1H), 6.89 (d, *J* = 5.1 Hz, 1H), 6.24 (s, 1H), 2.72 (t, *J* = 11.2, 5.4 Hz, 2H), 2.45-2.40 (m, 2H), 2.36 (s, 3H), 2.10 (dt, *J* = 12.8, 6.2 Hz, 2H); <sup>13</sup>C NMR (151 MHz, CDCl<sub>3</sub>) δ 199.19, 153.74, 137.64, 136.45, 132.58, 126.16, 125.24, 36.86, 30.76, 22.62, 16.93; HRMS (ESI) *m/z* calculated for C<sub>11</sub>H<sub>13</sub>OS [M+H]<sup>+</sup>: 193.0682, found 193.0682.

### 3-(4-methoxythiophen-2-yl)cyclohex-2-enone (2d)

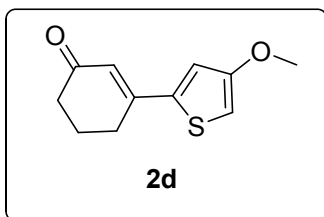

This compound was prepared by the general procedure described above in the absence of  $\text{AgSbF}_6$  and was obtained as a yellow solid (32.6 mg) in 63% yield.

Rf (hexane:EtOAc = 2:1): 0.40;  $^1\text{H}$  NMR (600 MHz,  $\text{CDCl}_3$ )  $\delta$  7.34 (d,  $J$  = 5.6 Hz, 1H), 6.90 (d,  $J$  = 5.6 Hz, 1H), 6.78 (s, 1H), 3.92 (s, 3H), 2.74 (t,  $J$  = 5.9 Hz, 2H), 2.44-2.40 (m, 2H), 2.11-2.05 (m, 2H);  $^{13}\text{C}$  NMR (151 MHz,  $\text{CDCl}_3$ )  $\delta$  199.96, 158.43, 152.10, 126.81, 122.51, 118.54, 116.82, 58.54, 37.11, 29.29, 22.62; HRMS (ESI)  $m/z$  calculated for  $\text{C}_{11}\text{H}_{13}\text{O}_2\text{S}$   $[\text{M}+\text{H}]^+$ : 209.0631, found 209.0631.

### 3-(5-chlorothiophen-2-yl)cyclohex-2-enone (2e)

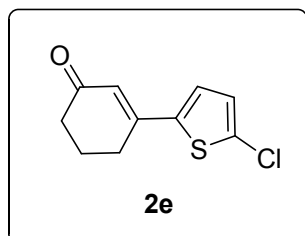

This compound was prepared by the general procedure described above and was obtained as a white solid (31.2 mg) in 59% yield.

Rf (hexane:EtOAc = 5:1): 0.35;  $^1\text{H}$  NMR (600 MHz,  $\text{CDCl}_3$ )  $\delta$  7.15 (d,  $J$  = 4.0 Hz, 1H), 6.90 (d,  $J$  = 4.0 Hz, 1H), 6.26 (s, 1H), 2.71-2.68 (m, 2H), 2.46-2.44 (m, 2H), 2.14-2.10 (m, 2H);  $^{13}\text{C}$  NMR (151 MHz,  $\text{CDCl}_3$ )  $\delta$  199.00, 151.32, 141.08, 133.67, 127.49, 126.84, 122.63, 37.17, 27.24, 22.26; HRMS (ESI)  $m/z$  calculated for  $\text{C}_{10}\text{H}_9\text{ClOS}$   $[\text{M}+\text{H}]^+$ : 213.0135, found 213.0134.

### 3-(5-bromothiophen-2-yl)cyclohex-2-enone (2f)

This compound was prepared by the general procedure described above

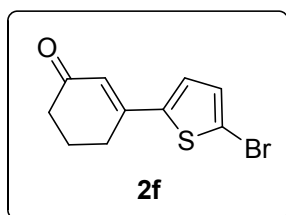

and was obtained as a yellow solid (36.6 mg) in 57% yield.

R<sub>f</sub> (hexane:EtOAc = 5:1): 0.35; <sup>1</sup>H NMR (600 MHz, CDCl<sub>3</sub>) δ 7.12 (d, *J* = 4.0 Hz, 1H), 7.05 (d, *J* = 4.0 Hz, 1H), 6.29 (s, 1H), 2.71-2.69 (m, 2H), 2.46-2.44 (m, 2H), 2.16-2.10 (m, 2H); <sup>13</sup>C NMR (151 MHz, CDCl<sub>3</sub>) δ 199.04, 151.17, 143.99, 131.20, 127.56, 122.81, 116.37, 37.17, 27.36, 22.29; HRMS (ESI) *m/z* calculated for C<sub>10</sub>H<sub>10</sub>BrOS [M+H]<sup>+</sup>: 256.9630, found 256.9623. Data is in accordance with the literature.<sup>6</sup>

### 3-(5-chloro-4-methylthiophen-2-yl)cyclohex-2-enone (2g)

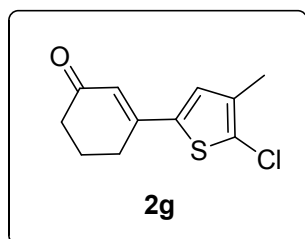

This compound was prepared by the general procedure described above and was obtained as a yellow solid (37.9 mg) in 67% yield.

R<sub>f</sub> (hexane:EtOAc = 5:1): 0.40; <sup>1</sup>H NMR (600 MHz, CDCl<sub>3</sub>) δ 7.06 (s, 1H), 6.24 (s, 1H), 2.69-2.65 (m, 2H), 2.45-2.41 (m, 2H), 2.17 (s, 3H), 2.13-2.07 (m, 2H); <sup>13</sup>C NMR (151 MHz, CDCl<sub>3</sub>) δ 199.02, 151.44, 138.42, 135.85, 129.04, 128.82, 122.23, 37.16, 27.14, 22.27, 13.59; HRMS (ESI) *m/z* calculated for C<sub>11</sub>H<sub>12</sub>ClOS [M+H]<sup>+</sup>: 227.0292, found 227.0290.

### 3-(5-phenylthiophen-2-yl)cyclohex-2-enone (2h)

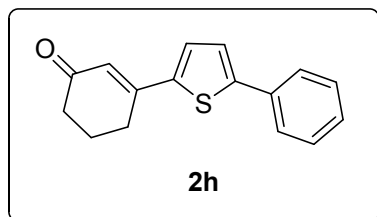

This compound was prepared by the general procedure described above and was obtained as a yellow solid (47.7 mg) in 75% yield.

Rf (hexane:EtOAc = 5:1): 0.47;  $^1\text{H}$  NMR (600 MHz,  $\text{CDCl}_3$ )  $\delta$  7.61 (d,  $J$  = 7.8 Hz, 2H), 7.40 (t,  $J$  = 7.5 Hz, 2H), 7.36-7.30 (m, 2H), 7.29 (d,  $J$  = 3.7 Hz, 1H), 6.43 (s, 1H), 2.78 (t,  $J$  = 6.0 Hz, 2H), 2.47 (t,  $J$  = 6.6 Hz, 2H), 2.17-2.12 (m, 2H);  $^{13}\text{C}$  NMR (151 MHz,  $\text{CDCl}_3$ )  $\delta$  199.26, 152.22, 147.66, 141.51, 133.42, 129.02, 128.54, 128.44, 125.91, 124.08, 122.32, 37.22, 27.61, 22.40; HRMS (ESI)  $m/z$  calculated for  $\text{C}_{16}\text{H}_{15}\text{OS}$   $[\text{M}+\text{H}]^+$ : 255.0838, found 255.0837.

### 3-(5-acetylthiophen-2-yl)cyclohex-2-enone (2i)

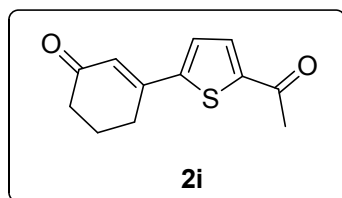

This compound was prepared by the general procedure described above using 0.5 equivalent Ac-Gly-OH in HFIP/dioxane (0.5 mL/0.5 mL)

instead of HFIP/dioxane (0.05 mL/1 mL) at 110 °C and was obtained as a yellow solid (24.4 mg) in 44% yield.

Rf (hexane:EtOAc = 2:1): 0.38;  $^1\text{H}$  NMR (600 MHz,  $\text{CDCl}_3$ )  $\delta$  7.63 (d,  $J$  = 3.7 Hz, 1H), 7.36 (d,  $J$  = 3.7 Hz, 1H), 6.48 (s, 1H), 2.76 (t,  $J$  = 5.9 Hz, 2H), 2.56 (s, 3H), 2.48 (t,  $J$  = 6.6 Hz, 2H), 2.18-2.13 (m, 2H);  $^{13}\text{C}$  NMR (151 MHz,  $\text{CDCl}_3$ )  $\delta$  199.04, 190.48, 151.13, 149.83, 145.52, 132.67, 127.20, 124.74, 37.14, 27.89, 26.74, 22.29; HRMS (ESI)  $m/z$  calculated for  $\text{C}_{12}\text{H}_{13}\text{O}_2\text{S}$   $[\text{M}+\text{H}]^+$ : 221.0631, found 221.0629.

### ethyl 5-(3-oxocyclohex-1-en-1-yl)thiophene-2-carboxylate (2j)

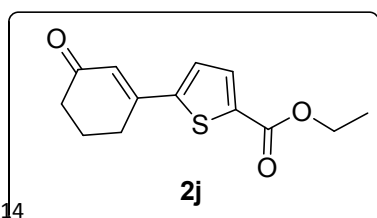

This compound was prepared by the general procedure described above using 0.5

equivalent Ac-Gly-OH in HFIP/dioxane (0.5 mL/0.5 mL) instead of HFIP/dioxane (0.05 mL/1 mL) at 110 °C and was obtained as a yellow solid (37.4 mg) in 60% yield.

R<sub>f</sub> (hexane:EtOAc = 5:1): 0.65; <sup>1</sup>H NMR (600 MHz, CDCl<sub>3</sub>) δ 7.72 (d, *J* = 4.0 Hz, 1H), 7.33 (d, *J* = 4.0 Hz, 1H), 6.46 (s, 1H), 4.35 (q, *J* = 7.1 Hz, 2H), 2.76 (t, *J* = 6.0 Hz, 2H), 2.49-2.46 (m, 2H), 2.17-2.13 (m, 2H), 1.37 (t, *J* = 7.1 Hz, 3H); <sup>13</sup>C NMR (151 MHz, CDCl<sub>3</sub>) δ 199.00, 161.65, 151.23, 148.43, 135.64, 133.65, 126.91, 124.32, 61.52, 37.14, 27.83, 22.28, 14.23; HRMS (ESI) *m/z* calculated for C<sub>13</sub>H<sub>15</sub>O<sub>3</sub>S [M+H]<sup>+</sup>: 251.0736, found 251.0735.

### 3-(2,3-dihydrothieno[3,4-b][1,4]dioxin-5-yl)cyclohex-2-enone (2k)

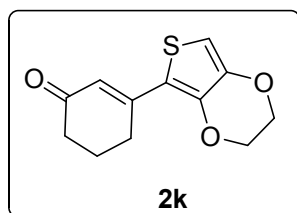

This compound was prepared by the general procedure described above and was obtained as a white solid (17.2 mg) in 29% yield.

R<sub>f</sub> (hexane:EtOAc = 2:1): 0.35; <sup>1</sup>H NMR (600 MHz, CDCl<sub>3</sub>) δ 6.72 (s, 1H), 6.51 (s, 1H), 4.32-4.29 (m, 2H), 4.23-4.21 (m, 2H), 2.71-2.68 (m, 2H), 2.45-2.42 (m, 2H), 2.11-2.06 (m, 2H); <sup>13</sup>C NMR (151 MHz, CDCl<sub>3</sub>) δ 199.75, 151.56, 142.41, 142.25, 122.65, 116.63, 102.93, 64.90, 64.17, 37.19, 28.16, 22.50; HRMS (ESI) *m/z* calculated for C<sub>12</sub>H<sub>13</sub>O<sub>3</sub>S [M+H]<sup>+</sup>: 237.0580, found 237.0578.

### 3-(benzo[b]thiophen-2-yl)cyclohex-2-enone (**2la**)

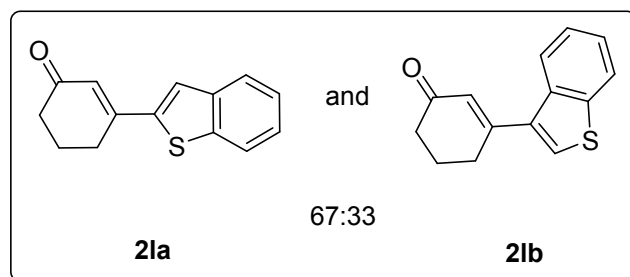

This compound was prepared by the general procedure described above and was obtained as a white

solid (13.4 mg) of inseparable mixture (**2c**/**2c'** = 67:33) in 23% yield.

$R_f$ (hexane:EtOAc = 5:1): 0.50;  $^1\text{H}$  and  $^{13}\text{C}$  NMR are described for the **2la** isomer:  $^1\text{H}$  NMR (600 MHz,  $\text{CDCl}_3$ )  $\delta$  7.79 (dd,  $J$  = 16.4, 7.5 Hz, 2H), 7.60 (s, 1H), 7.40-7.35 (td,  $J$  = 13.6, 7.0 Hz, 2H), 6.48 (s, 1H), 2.87 (t,  $J$  = 5.9 Hz, 2H), 2.53-2.50 (m, 2H), 2.24-2.16 (m,  $J$  = 19.0, 6.4 Hz, 2H);  $^{13}\text{C}$  NMR (151 MHz,  $\text{CDCl}_3$ )  $\delta$  199.34, 152.47, 142.45, 140.13, 139.68, 126.21, 124.88, 124.83, 124.73, 124.43, 122.37, 37.33, 27.53, 22.43; HRMS (ESI)  $m/z$  calculated for  $\text{C}_{14}\text{H}_{13}\text{OS}$   $[\text{M}+\text{H}]^+$ : 229.0682, found 229.0681. Data is in accordance with the literature.<sup>7</sup>

### 3-(furan-2-yl)cyclohex-2-enone (**2m**)

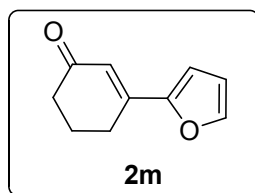

This compound was prepared by the general procedure described above and was obtained as a colorless oil (16.9 mg) in 42% yield.

$R_f$  (hexane:EtOAc = 5:1): 0.40;  $^1\text{H}$  NMR (600 MHz,  $\text{CDCl}_3$ )  $\delta$  7.53 (s, 1H), 6.74 (s, 1H), 6.49 (d,  $J$  = 14.2 Hz, 2H), 2.65 (t,  $J$  = 5.9 Hz, 2H), 2.46 (t,  $J$  = 6.2 Hz, 2H), 2.14 – 2.09 (m, 2H);  $^{13}\text{C}$  NMR (151 MHz,  $\text{CDCl}_3$ )  $\delta$  199.48, 152.18, 147.11, 145.00, 120.98, 112.49, 112.28, 37.50, 25.31,



22.39; HRMS (ESI)  $m/z$  calculated for  $C_{10}H_{11}O_2$   $[M+H]^+$ : 163.0754, found 163.0753.

### 3-(5-methylfuran-2-yl)cyclohex-2-enone (2n)

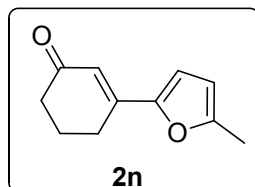

This compound was prepared by the general procedure described above and was obtained as a white solid (24.7 mg) in 56% yield.

R<sub>f</sub> (hexane:EtOAc = 5:1): 0.45; <sup>1</sup>H NMR (600 MHz, CDCl<sub>3</sub>) δ 6.64 (d, *J* = 3.3 Hz, 1H), 6.41 (s, 1H), 6.12-6.09 (m, 1H), 2.62-2.59 (m, 2H), 2.45-2.42 (m, 2H), 2.34 (s, 3H), 2.11-2.05 (m, 2H); <sup>13</sup>C NMR (151 MHz, CDCl<sub>3</sub>) δ 199.45, 155.78, 150.53, 147.17, 119.60, 114.13, 108.85, 37.48, 25.13, 22.42, 13.87; HRMS (ESI)  $m/z$  calculated for  $C_{11}H_{13}O_2$   $[M+H]^+$ : 177.0910, found 177.0909. The data is in accordance with the literature.<sup>8</sup>

### 3-(5-methyl-3-phenylthiophen-2-yl)cyclohex-2-enone (2o)

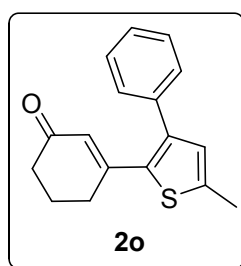

This compound was prepared by the general procedure described above and was obtained as a white solid (57.2 mg) in 85% yield.

R<sub>f</sub> (hexane:EtOAc = 5:1): 0.50; <sup>1</sup>H NMR (600 MHz, CDCl<sub>3</sub>) δ 7.39-7.35 (m, 2H), 7.32 (t, *J* = 7.2 Hz, 3H), 6.78 (s, 1H), 6.17 (s, 1H), 2.49 (s, 3H), 2.39-2.34 (m, 4H), 1.94-1.89 (m, 2H); <sup>13</sup>C NMR (151 MHz, CDCl<sub>3</sub>) δ 199.14, 155.36, 142.07, 140.90, 136.86, 134.37, 130.07, 128.50, 128.45, 127.65, 126.81, 37.18, 29.94, 22.90, 15.30; HRMS (ESI)  $m/z$  calculated

for  $C_{17}H_{17}OS$   $[M+H]^+$ : 269.0995, found 269.0991.

### 3-(5-methyl-3-(*o*-tolyl)thiophen-2-yl)cyclohex-2-enone (2p)

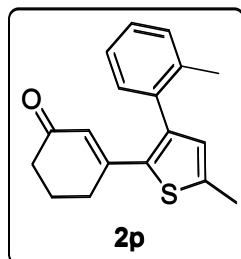

This compound was prepared by the general procedure described above and was obtained as a colorless oil (67.8 mg) in 96% yield.

$R_f$  (hexane:EtOAc = 5:1): 0.50;  $^1H$  NMR (600 MHz,  $CDCl_3$ )  $\delta$  7.26-7.21 (m, 2H), 7.18 (t,  $J$  = 7.3 Hz, 1H), 7.11 (d,  $J$  = 7.5 Hz, 1H), 6.61 (s, 1H), 6.00 (s, 1H), 2.49 (s, 3H), 2.32-2.27 (m, 4H), 2.14 (s, 3H), 1.90-1.85 (m, 2H);  $^{13}C$  NMR (151 MHz,  $CDCl_3$ )  $\delta$  199.20, 154.42, 142.35, 141.19, 136.99, 135.71, 135.10, 130.52, 130.18, 129.10, 127.96, 125.85, 124.62, 36.98, 29.27, 22.77, 19.89, 15.38; HRMS (ESI)  $m/z$  calculated for  $C_{18}H_{19}OS$   $[M+H]^+$ : 283.1151, found 283.1150.

### 3-(3,5-diphenylthiophen-2-yl)cyclohex-2-enone (2q)

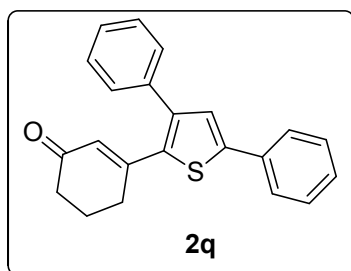

This compound was prepared by the general procedure described above and was obtained as a yellow oil (43.8 mg) in 53% yield.

$R_f$  (hexane:EtOAc = 5:1): 0.47;  $^1H$  NMR (600 MHz,  $CDCl_3$ )  $\delta$  7.63-7.62 (m, 2H), 7.44-7.31 (m, 8H), 7.30 (s, 1H), 6.27 (s, 1H), 2.44-2.39 (m, 4H), 1.96 (dt,  $J$  = 12.6, 6.2 Hz, 2H);  $^{13}C$  NMR (151 MHz,  $CDCl_3$ )  $\delta$  199.03, 154.87, 144.50, 142.89, 136.63, 135.83, 133.27, 129.00, 128.62, 128.46, 128.28, 127.92, 127.35, 127.24, 125.77, 37.19, 29.89, 22.89; HRMS (ESI)

$m/z$  calculated for  $C_{22}H_{19}OS$   $[M+H]^+$ : 331.1151, found 331.1148.

### 3-(5-phenyl-3-(*o*-tolyl)thiophen-2-yl)cyclohex-2-enone (2r)

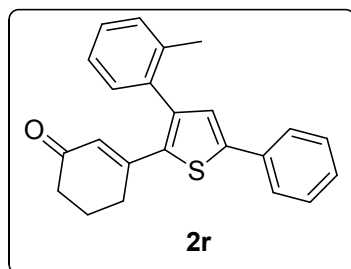

This compound was prepared by the general procedure described above and was obtained as a yellow oil (43.4 mg) in 50% yield.

$R_f$  (hexane:EtOAc = 5:1): 0.42;  $^1H$  NMR (600 MHz,  $CDCl_3$ )  $\delta$  7.64-7.61 (t, 2H), 7.41 (dd,  $J$  = 10.6, 4.8 Hz, 2H), 7.35-7.27 (m, 3H), 7.24 (m,  $J$  = 11.5, 4.4 Hz, 1H), 7.22-7.19 (m, 1H), 7.18 (s, 1H), 6.10 (s, 1H), 2.39-2.34 (m, 4H), 2.20 (s, 3H), 1.96-1.91 (m, 2H);  $^{13}C$  NMR (151 MHz,  $CDCl_3$ )  $\delta$  199.12, 153.92, 144.66, 143.14, 136.77, 136.59, 135.83, 133.27, 130.37, 129.17, 129.03, 128.34, 128.28, 127.83, 126.05, 125.75, 125.25, 37.06, 29.33, 22.83, 19.99; HRMS (ESI)  $m/z$  calculated for  $C_{23}H_{21}OS$   $[M+H]^+$ : 345.1308, found 345.1305.

### 3-(3-methyl-4-phenylthiophen-2-yl)cyclohex-2-enone (2s) and 3,3'-(3-methyl-4-phenylthiophene-2,5-diyl)bis(cyclohex-2-enone) (2s')

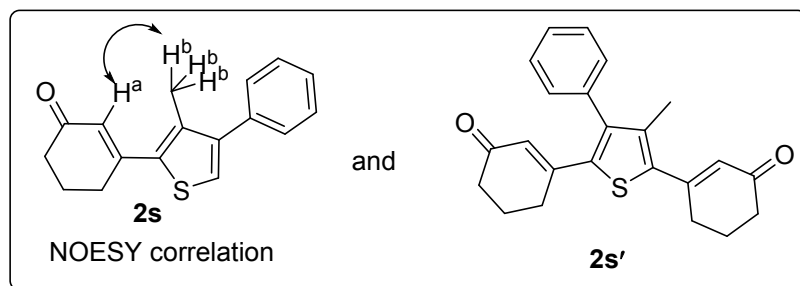

The use of **1s** as substrate following the general

procedure, **2s** (30 mg, 45%) and **2s'** (42.0 mg, 46%) were obtained.

**2s**,  $R_f$  (hexane:EtOAc = 5:1): 0.40, green solid;  $^1H$  NMR (600 MHz,

CDCl<sub>3</sub>)  $\delta$  7.43 (t,  $J$  = 7.4 Hz, 2H), 7.38 – 7.33 (m, 3H), 7.31 (s, 1H), 6.32 (s, 1H), 2.80 (t,  $J$  = 5.9 Hz, 2H), 2.52 – 2.48 (t, 2H), 2.31 (s, 3H), 2.19 – 2.14 (m, 2H); <sup>13</sup>C NMR (151 MHz, CDCl<sub>3</sub>)  $\delta$  199.36, 154.22, 146.03, 137.95, 136.61, 135.80, 128.96, 128.39, 127.46, 126.23, 124.10, 37.08, 31.15, 22.78, 16.44; HRMS (ESI)  $m/z$  calculated for C<sub>17</sub>H<sub>17</sub>OS [M+H]<sup>+</sup>: 269.0995, found 269.0992.

**2s'**, R<sub>f</sub> (hexane:EtOAc = 2:1): 0.40, yellow oil; <sup>1</sup>H NMR (600 MHz, CDCl<sub>3</sub>)  $\delta$  7.44-7.38 (m, 3H), 7.20-7.18 (m, 2H), 6.30 (s, 1H), 6.08 (s, 1H), 2.78 (t,  $J$  = 5.9 Hz, 2H), 2.51-2.48 (m, 2H), 2.33 (t,  $J$  = 6.6 Hz, 2H), 2.23 (t,  $J$  = 5.9 Hz, 2H), 2.17-2.14 (m, 2H), 2.10 (s, 3H), 1.89-1.84 (m, 2H); <sup>13</sup>C NMR (151 MHz, CDCl<sub>3</sub>)  $\delta$  199.12, 198.92, 154.01, 153.31, 144.45, 138.96, 138.39, 137.86, 136.31, 129.40, 128.77, 128.20, 127.83, 127.10, 37.10, 37.02, 31.13, 29.80, 22.81, 22.75, 16.30; HRMS (ESI)  $m/z$  calculated for C<sub>23</sub>H<sub>23</sub>O<sub>2</sub>S [M+H]<sup>+</sup>: 363.1413, found 363.1409.

**3-(3-methyl-4-(o-tolyl)thiophen-2-yl)cyclohex-2-enone (2t) and 3,3'-(3-methyl-4-(o-tolyl)thiophene-2,5-diyl)bis(cyclohex-2-enone) (2t')**

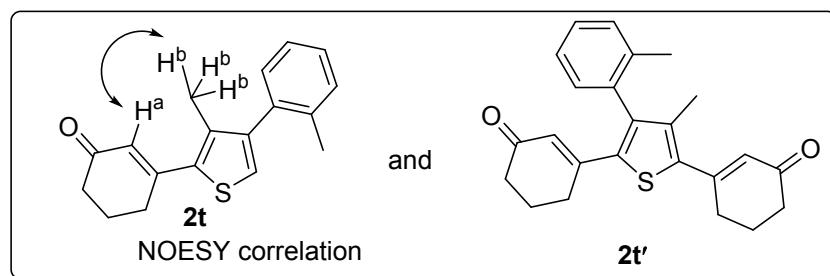

The use of **1t** as substrate following the general

procedure, **2t** (31.7 mg, 45%) and **2t'** (48.1 mg, 40%) were obtained.

**2t**, R<sub>f</sub> (hexane:EtOAc = 5:1): 0.42, white solid; <sup>1</sup>H NMR (600 MHz,

CDCl<sub>3</sub>)  $\delta$  7.29 (q,  $J$  = 7.4 Hz, 2H), 7.23 (t,  $J$  = 6.9 Hz, 1H), 7.19 (s, 1H), 7.12 (d,  $J$  = 7.4 Hz, 1H), 6.34 (s, 1H), 2.82 (t,  $J$  = 5.7 Hz, 2H), 2.50 (t,  $J$  = 6.6 Hz, 2H), 2.17 (dt,  $J$  = 12.7, 6.2 Hz, 2H), 2.11 (d,  $J$  = 6.4 Hz, 6H); <sup>13</sup>C NMR (151 MHz, CDCl<sub>3</sub>)  $\delta$  199.43, 154.22, 145.58, 137.12, 136.94, 136.79, 136.38, 130.08, 129.98, 127.93, 125.67, 125.62, 124.04, 37.08, 30.99, 22.81, 19.89, 15.89; HRMS (ESI)  $m/z$  calculated for C<sub>18</sub>H<sub>19</sub>OS [M+H]<sup>+</sup>: 283.1151, found 283.1148.

**2t'**, R<sub>f</sub> (hexane:EtOAc = 2:1): 0.40, yellow oil; <sup>1</sup>H NMR (600 MHz, CDCl<sub>3</sub>)  $\delta$  7.33-7.26 (m, 2H), 7.24 (t,  $J$  = 7.3 Hz, 1H), 7.03 (d,  $J$  = 7.5 Hz, 1H), 6.32 (s, 1H), 5.97 (s, 1H), 2.79 (t,  $J$  = 5.8 Hz, 2H), 2.51-2.48 (m, 2H), 2.33-2.26 (m, 4H), 2.20-2.14 (m, 2H), 2.04 (s, 3H), 1.98 (s, 3H), 1.92-1.87 (m, 2H); <sup>13</sup>C NMR (151 MHz, CDCl<sub>3</sub>)  $\delta$  199.16, 199.04, 153.25, 153.20, 144.50, 138.81, 138.65, 138.12, 136.32, 136.08, 130.50, 129.44, 128.63, 126.90, 126.43, 126.42, 37.05, 30.99, 29.36, 22.78, 22.77, 19.68, 15.84; HRMS (ESI)  $m/z$  calculated for C<sub>24</sub>H<sub>25</sub>O<sub>2</sub>S [M+H]<sup>+</sup>: 377.1570, found 377.1565.

### 3-(thiophen-2-yl)cyclohept-2-en-1-one (2u)

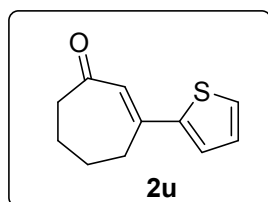

This compound was prepared by the general procedure described above and was obtained as a yellow solid (13.5 mg) in 28% yield.

R<sub>f</sub> (hexane:EtOAc = 5:1): 0.45; <sup>1</sup>H NMR (600 MHz, CDCl<sub>3</sub>)  $\delta$  7.36 (d,  $J$  = 4.8 Hz, 1H), 7.32 (s, 1H), 7.05 (s, 1H), 6.50 (s, 1H), 2.93-2.90 (m, 2H),

2.68-2.65 (m, 2H), 1.97-1.92 (m, 2H), 1.89-1.84 (m, 2H);  $^{13}\text{C}$  NMR (151 MHz,  $\text{CDCl}_3$ )  $\delta$  203.62, 149.66, 145.16, 128.24, 128.01, 127.18, 126.73, 41.89, 31.23, 24.90, 21.00; HRMS (ESI)  $m/z$  calculated for  $\text{C}_{11}\text{H}_{13}\text{OS}$   $[\text{M}+\text{H}]^+$ : 193.0682, found: 193.0683.

### 3-(5-phenylthiophen-2-yl)cyclopent-2-en-1-one (2v)

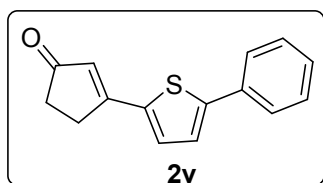

This compound was prepared by the general procedure described above and was obtained as a yellow solid (25.6 mg) in 43% yield.

R<sub>f</sub> (hexane:EtOAc = 2:1): 0.3;  $^1\text{H}$  NMR (600 MHz,  $\text{CDCl}_3$ )  $\delta$  7.65-7.62 (m, 2H), 7.44-7.39 (m, 3H), 7.37-7.32 (m, 2H), 6.36 (t,  $J$  = 1.5 Hz, 1H), 3.04 (ddd,  $J$  = 6.7, 3.2, 1.6 Hz, 2H), 2.59 – 2.56 (m, 2H);  $^{13}\text{C}$  NMR (151 MHz,  $\text{CDCl}_3$ )  $\delta$  208.36, 166.36, 149.31, 137.46, 133.28, 129.65, 129.09, 128.68, 126.01, 125.42, 124.12, 35.02, 29.02; HRMS (ESI)  $m/z$  calculated for  $\text{C}_{15}\text{H}_{13}\text{OS}$   $[\text{M}+\text{H}]^+$ : 241.0682, found 241.0682.

### 3-(5-phenylthiophen-2-yl)cyclohept-2-en-1-one (2w)

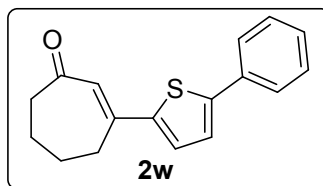

This compound was prepared by the general procedure described above and was obtained as a yellow solid (28.2 mg) in 42% yield.

R<sub>f</sub> (hexane:EtOAc = 5:1): 0.35;  $^1\text{H}$  NMR (600 MHz,  $\text{CDCl}_3$ )  $\delta$  7.62-7.60 (m, 2H), 7.40 (t,  $J$  = 7.7 Hz, 2H), 7.34- 7.31 (m, 2H), 7.27 (d,  $J$  = 3.9 Hz, 1H), 6.53 (s, 1H), 2.94-2.91 (m, 2H), 2.70-2.67 (m, 2H), 1.99-1.94 (m, 2H), 1.89 (dt,  $J$  = 13.2, 6.5 Hz, 2H);  $^{13}\text{C}$  NMR (151 MHz,  $\text{CDCl}_3$ )  $\delta$

203.56, 149.58, 146.92, 143.97, 133.59, 129.00, 128.26, 127.97, 126.81, 125.84, 124.12, 41.87, 30.67, 24.89, 21.01; HRMS (ESI)  $m/z$  calculated for  $C_{17}H_{17}OS$   $[M+H]^+$ : 269.0995, found 269.0996.

### General procedure for the palladium-catalyzed dehydrogenation of $\beta$ -thiophene-substituted cyclohexenone to *meta*-phenol derivatives

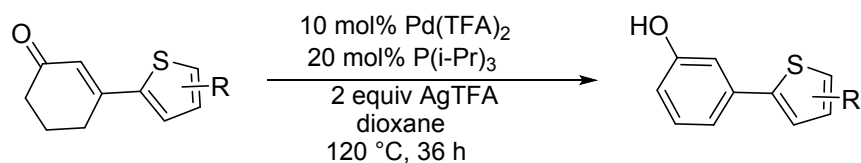

A 10 mL reaction tube equipped with a magnetic stirring bar was added  $\beta$ -thiophene-substituted cyclohexenone (0.15 mmol),  $\text{Pd(TFA)}_2$  (10 mol%), silver trifluoroacetate (2.0 equiv), triisopropylphosphane (20 mol%) in 1,4-dioxane (0.75 mL) at  $120^\circ\text{C}$  for 36 h. The reaction mixture was cooled to room temperature, followed by the addition of water and ethyl acetate. The organic layer was separated and the aqueous layer was extracted with ethyl acetate ( $3 \times 10 \text{ mL}$ ). The combined organic layer was washed with brine and dried over anhydrous  $\text{Na}_2\text{SO}_4$ , filtrated and concentrated in *vacuo*, the residue was purified through column chromatography on silica gel to give the desired products.

### Characterization data for the products

#### 3-(thiophen-2-yl)phenol (3a)

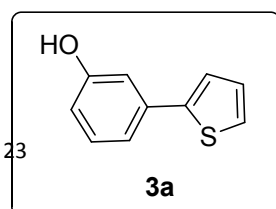

This compound was prepared by the general

procedure described above and was obtained as a yellow oil (14.7 mg) in 83% yield.

R<sub>f</sub> (hexane:EtOAc = 5:1): 0.50; <sup>1</sup>H NMR (600 MHz, CDCl<sub>3</sub>) δ 7.30 (dd, *J* = 3.6, 1.0 Hz, 1H), 7.29-7.26 (m, 1H), 7.24 (d, *J* = 7.9 Hz, 1H), 7.22-7.19 (m, 1H), 7.11-7.09 (m, 1H), 7.08 (dd, *J* = 5.1, 3.6 Hz, 1H), 6.76 (m, 1H), 4.93 (s, 1H); <sup>13</sup>C NMR (151 MHz, CDCl<sub>3</sub>) δ 155.81, 143.86, 135.96, 130.13, 127.95, 124.95, 123.33, 118.64, 114.42, 112.79; HRMS (ESI) *m/z* calculated for C<sub>10</sub>H<sub>7</sub>OS [M-H]<sup>-</sup>: 175.0212, found 175.0217.

### 3-(5-methylthiophen-2-yl)phenol (3b)

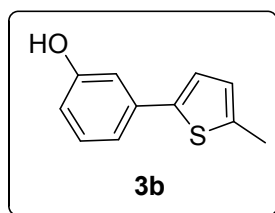

This compound was prepared by the general procedure described above and was obtained as a white solid (9.4 mg) in 33% yield.

R<sub>f</sub> (hexane:EtOAc = 5:1): 0.48; <sup>1</sup>H NMR (600 MHz, CDCl<sub>3</sub>) δ 7.22 (t, *J* = 7.9 Hz, 1H), 7.14-7.12 (m, 1H), 7.09 (d, *J* = 3.5 Hz, 1H), 7.03-7.02 (m, 1H), 6.73-6.70 (m, 2H), 4.83 (s, 1H), 2.50 (d, *J* = 0.7 Hz, 3H); <sup>13</sup>C NMR (151 MHz, CDCl<sub>3</sub>) δ 155.80, 141.40, 139.71, 136.28, 130.03, 126.15, 123.16, 118.18, 113.94, 112.30, 15.45; HRMS (ESI) *m/z* calculated for C<sub>11</sub>H<sub>9</sub>OS [M-H]<sup>-</sup>: 189.0369, found 189.0375.

### 3-(5-chlorothiophen-2-yl)phenol (3c)

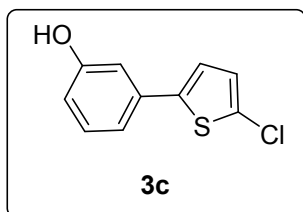

This compound was prepared by the general procedure described above and was obtained as a white solid (22.9 mg) in 72% yield.



Rf (hexane:EtOAc = 5:1): 0.50;  $^1\text{H}$  NMR (600 MHz,  $\text{CDCl}_3$ )  $\delta$  7.24 (t,  $J$  = 7.9 Hz, 1H), 7.10-7.07 (m, 1H), 7.05 (d,  $J$  = 3.9 Hz, 1H), 6.99-6.98 (m, 1H), 6.88 (d,  $J$  = 3.9 Hz, 1H), 6.78-6.75 (m, 1H), 4.99 (s, 1H);  $^{13}\text{C}$  NMR (151 MHz,  $\text{CDCl}_3$ )  $\delta$  155.97, 142.37, 135.21, 130.26, 129.30, 127.06, 122.49, 118.18, 114.82, 112.39; HRMS (ESI)  $m/z$  calculated for  $\text{C}_{10}\text{H}_6\text{ClOS}$   $[\text{M}-\text{H}]^-$ : 208.9822, found 208.9831.

### 3-(5-chloro-4-methylthiophen-2-yl)phenol (3d)

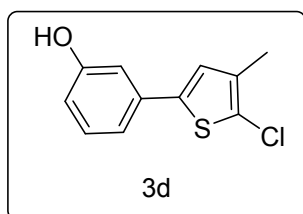

This compound was prepared by the general procedure described above and was obtained as a white solid (23.5 mg) in 74% yield.

Rf (hexane:EtOAc = 5:1): 0.50;  $^1\text{H}$  NMR (600 MHz,  $\text{CDCl}_3$ )  $\delta$  7.22 (t,  $J$  = 7.9 Hz, 1H), 7.08-7.05 (m, 1H), 6.97-6.95 (m, 2H), 6.76-6.73 (m, 1H), 4.90 (s, 1H), 2.20 (s, 3H);  $^{13}\text{C}$  NMR (151 MHz,  $\text{CDCl}_3$ )  $\delta$  155.92, 139.74, 135.31, 135.29, 130.20, 124.87, 124.25, 118.02, 114.65, 112.20, 13.68; HRMS (ESI)  $m/z$  calculated for  $\text{C}_{11}\text{H}_8\text{ClOS}$   $[\text{M}-\text{H}]^-$ : 222.9979, found 222.9987.

### 3-(5-phenylthiophen-2-yl)phenol (3e)

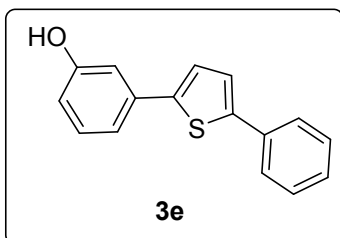

This compound was prepared by the general procedure described above and was obtained as a white solid (20.8 mg) in 55% yield.

Rf (hexane:EtOAc = 5:1): 0.50;  $^1\text{H}$  NMR (600 MHz,  $\text{CDCl}_3$ )  $\delta$  7.63 (dd,  $J$  = 8.3, 1.1 Hz, 2H), 7.40 (dd,  $J$  = 10.6, 4.9 Hz,

2H), 7.31-7.24 (m, 4H), 7.23-7.21 (m, 1H), 7.12-7.11 (m, 1H), 6.78-6.75 (m, 1H), 4.94 (s, 1H);  $^{13}\text{C}$  NMR (151 MHz,  $\text{CDCl}_3$ )  $\delta$  155.90, 143.77, 143.04, 135.87, 134.22, 130.16, 128.92, 127.57, 125.64, 124.26, 123.94, 118.32, 114.49, 112.44; HRMS (ESI)  $m/z$  calculated for  $\text{C}_{16}\text{H}_{11}\text{OS}$   $[\text{M}-\text{H}]^-$ : 251.0525, found 251.0537.

### 1-(5-(3-hydroxyphenyl)thiophen-2-yl)ethanone (3f)

This compound was prepared by the general procedure described above and was obtained as a white solid (22.9 mg) in 70% yield.

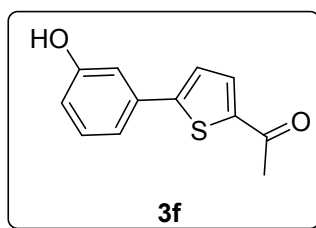

R<sub>f</sub> (hexane:EtOAc = 2:1): 0.40;  $^1\text{H}$  NMR (600 MHz,  $\text{CDCl}_3$ )  $\delta$  7.67 (d,  $J$  = 3.9 Hz, 1H), 7.32-7.30 (m, 1H), 7.28 (d,  $J$  = 7.9 Hz, 1H), 7.23 (d,  $J$  = 7.8 Hz, 1H), 7.21 (s, 1H), 6.86 (dd,  $J$  = 8.0, 2.2 Hz, 1H), 5.62 (d,  $J$  = 12.4 Hz, 1H), 2.58 (s, 3H);  $^{13}\text{C}$  NMR (151 MHz,  $\text{CDCl}_3$ )  $\delta$  191.09, 156.32, 152.78, 143.00, 134.71, 133.70, 130.38, 124.11, 118.63, 116.20, 113.25, 26.53; HRMS (ESI)  $m/z$  calculated for  $\text{C}_{12}\text{H}_9\text{O}_2\text{S}$   $[\text{M}-\text{H}]^-$ : 217.0318, found 217.0327.

### Reference:

1. Colletto, C.; Islam, S.; Juliá-Hernández, F.; Larrosa, I. *J. Am. Chem. Soc.* **2016**, *138*, 1677.
2. Yuan, K. D.; Doucet, H. *Chem. Sci.*, **2014**, *5*, 392.
3. Funaki, K.; Sato, T.; Oi, S. *Org. Lett.*, **2012**, *14*, 6186.

- 
4. Mao, S. L.; Sun, Y.; Yu, G. A.; Zhao, C.; Han, Z. J.; Yuan, J.; Zhu, X. L.; Yang, Q. H.; Liu, S. H. *Org. Biomol. Chem.*, **2012**, *10*, 9410.
  5. Kikushima, K.; Nishina, Y. *RSC Advances*, **2013**, *3*, 20150.
  6. Chen, K. F.; Hsu, Y. C.; Wu, Q. Y.; Yeh, M. C. P.; Sun, S. S. *Org. Lett.*, **2009**, *11*, 377-380.
  7. Jimenez, M. E.; Bush, K.; Pawlik, J.; Sower, L.; Peterson, J. W.; Gilbertson, S. R. *Bioorg. Med. Chem. Lett.* **2008**, *18*, 4215.
  8. Moreno-Dorado, F. J.; Guerra, F. M.; Aladro, F. J.; Bustamante, J. M.; Jorge, Z. D.; Massanet, G. M. *Tetrahedron*, **1999**, *55*, 6997.

Copy of  $^1\text{H}$  NMR,  $^{13}\text{C}$  NMR Spectra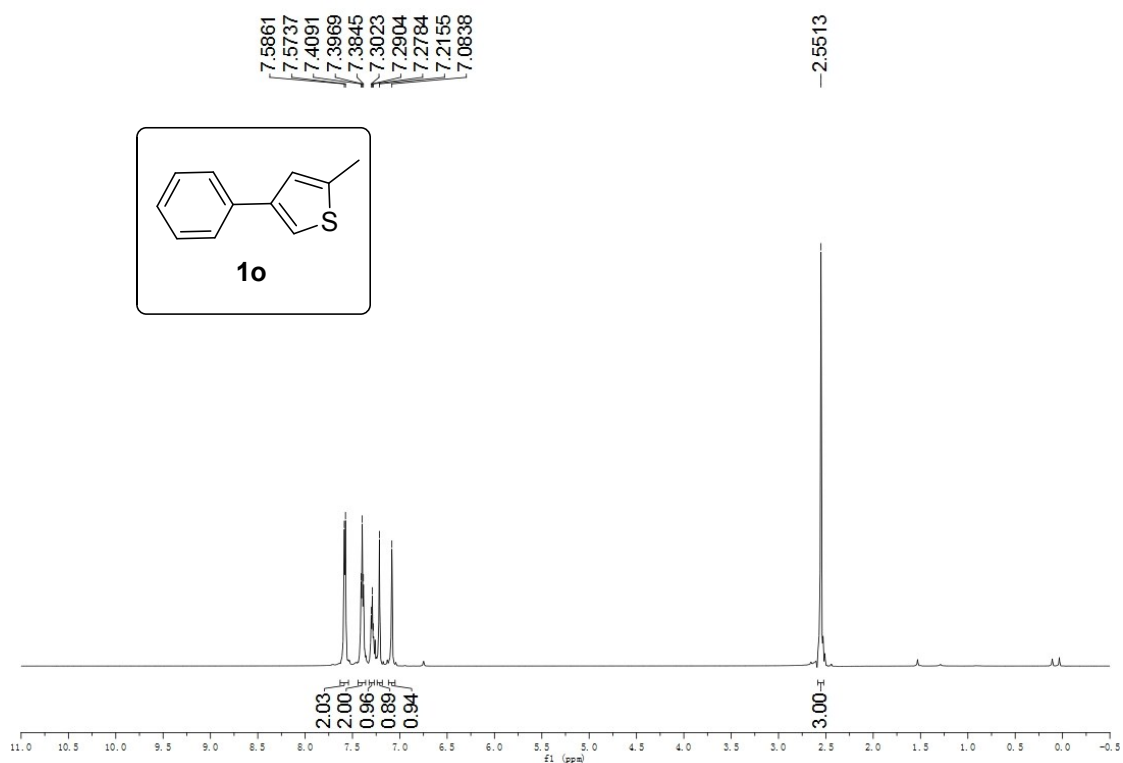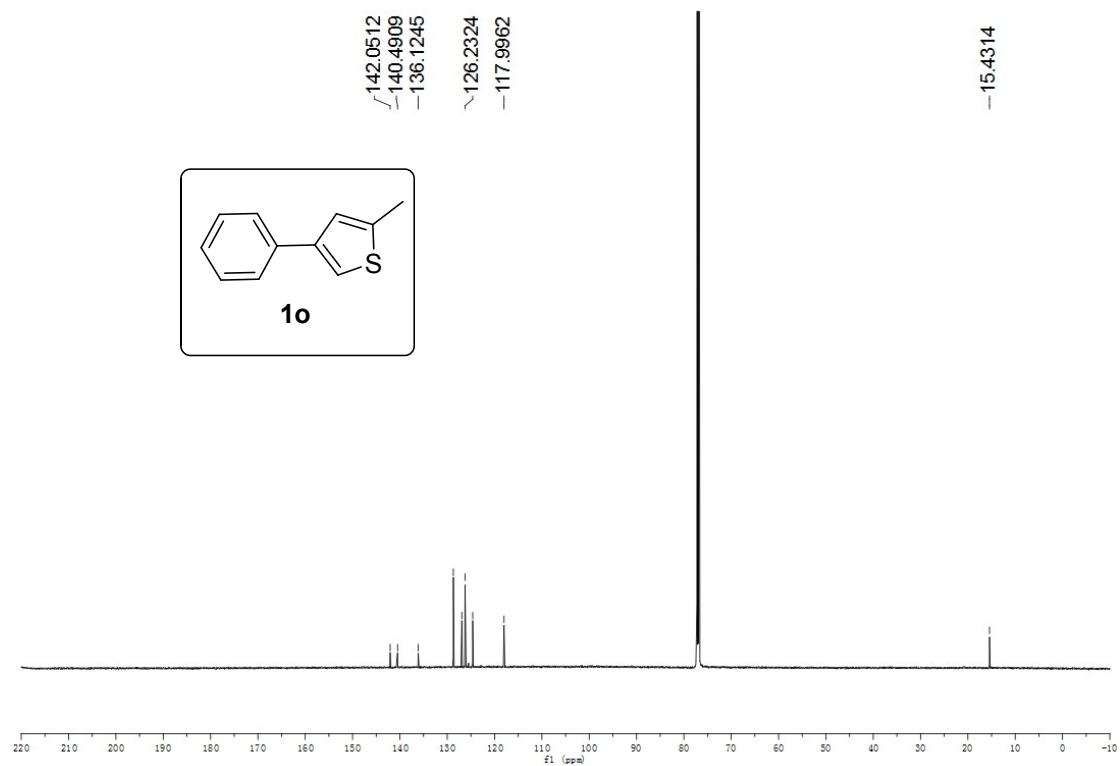

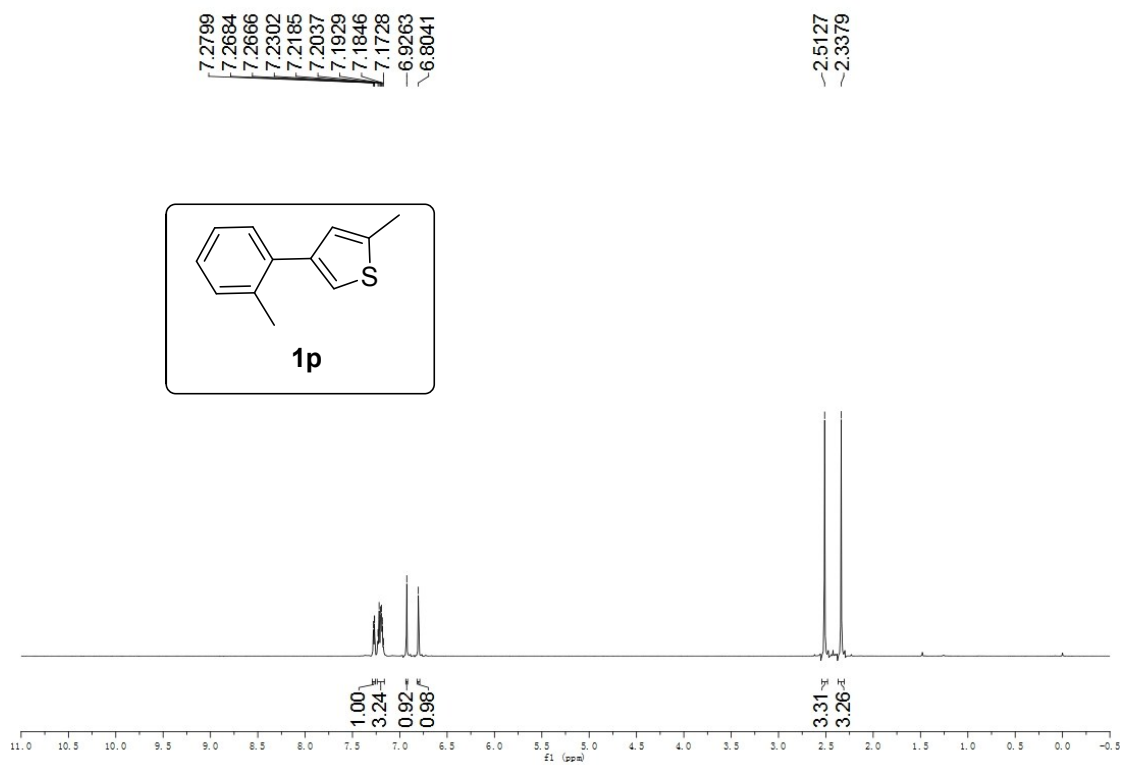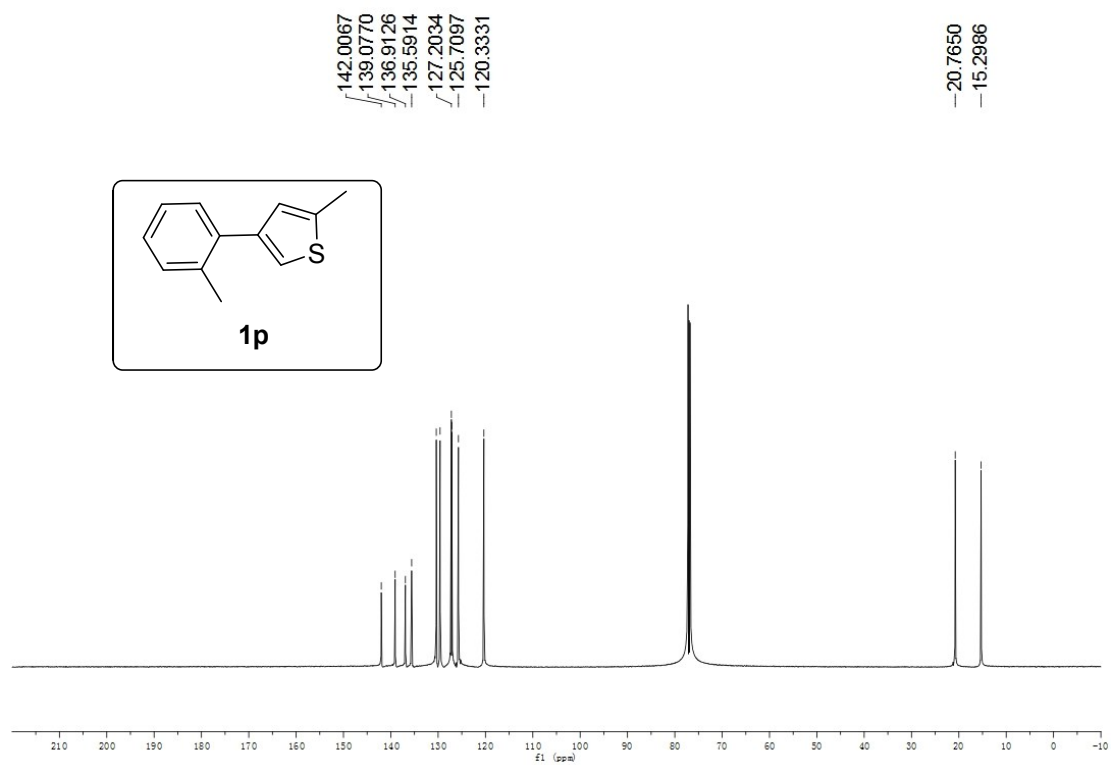

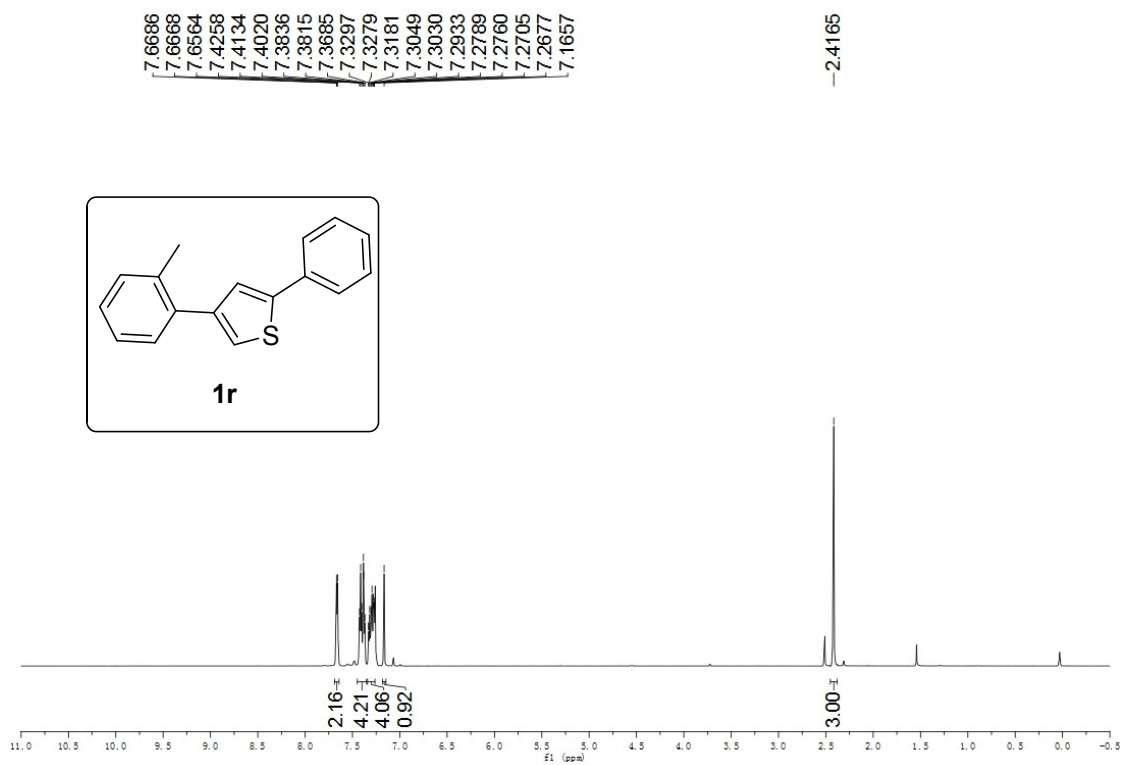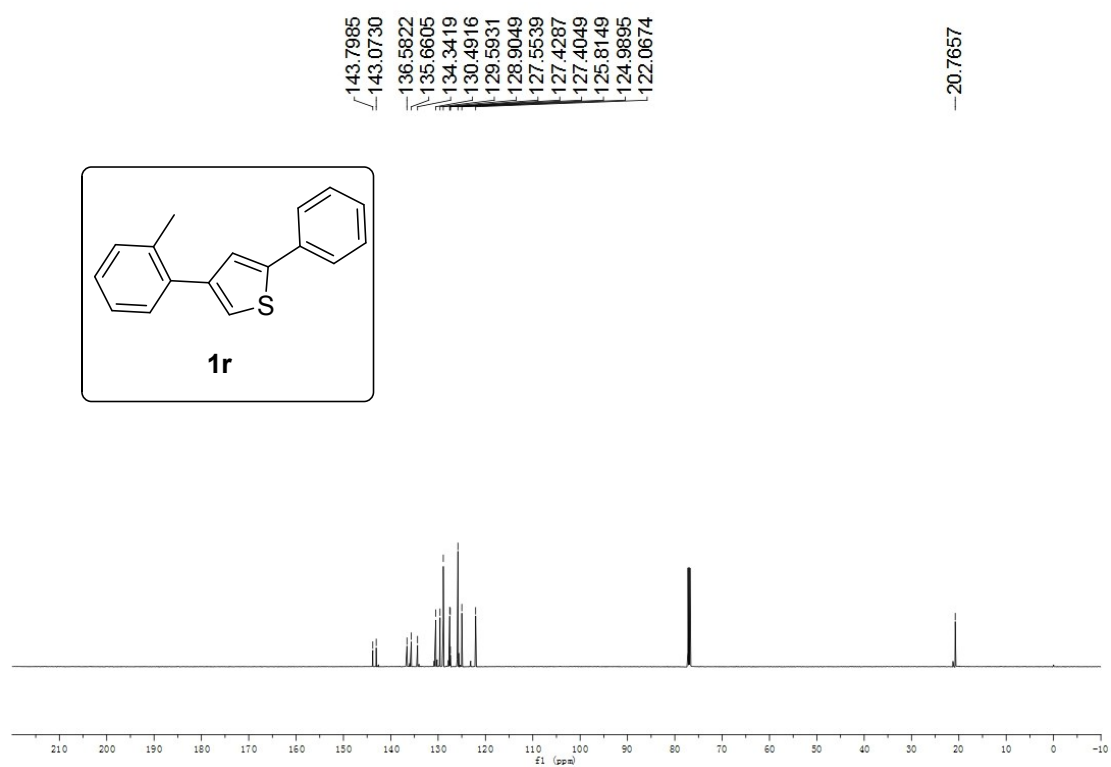

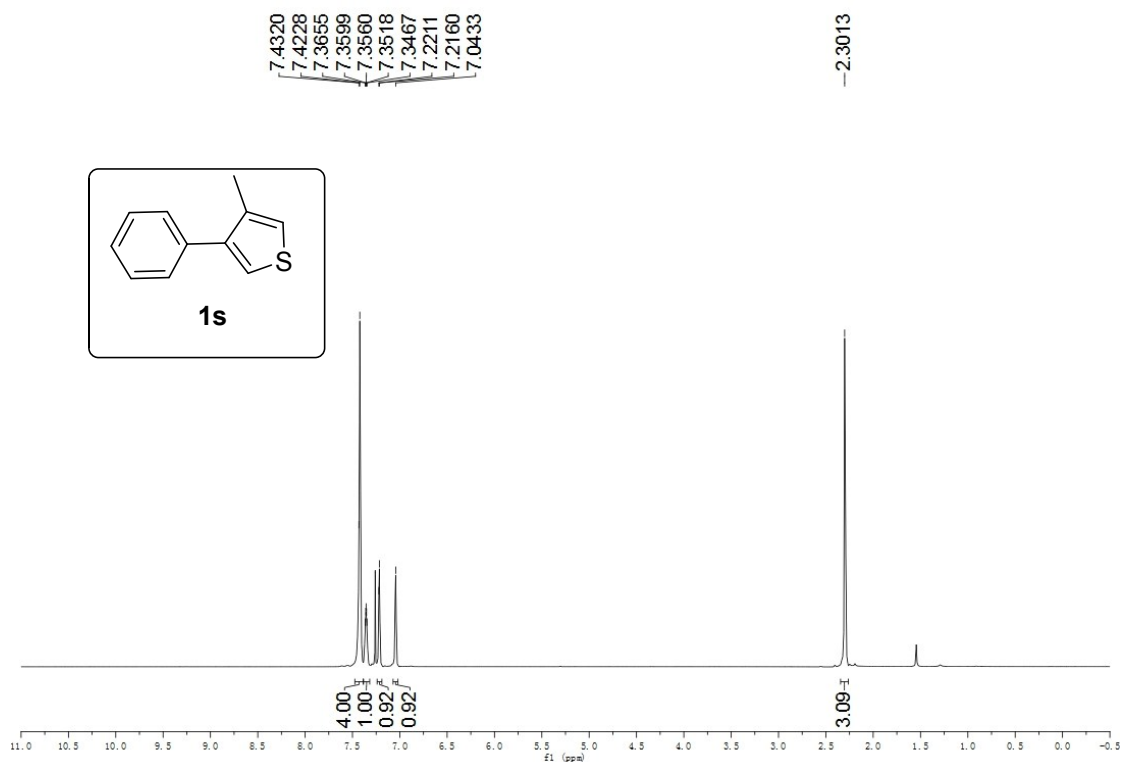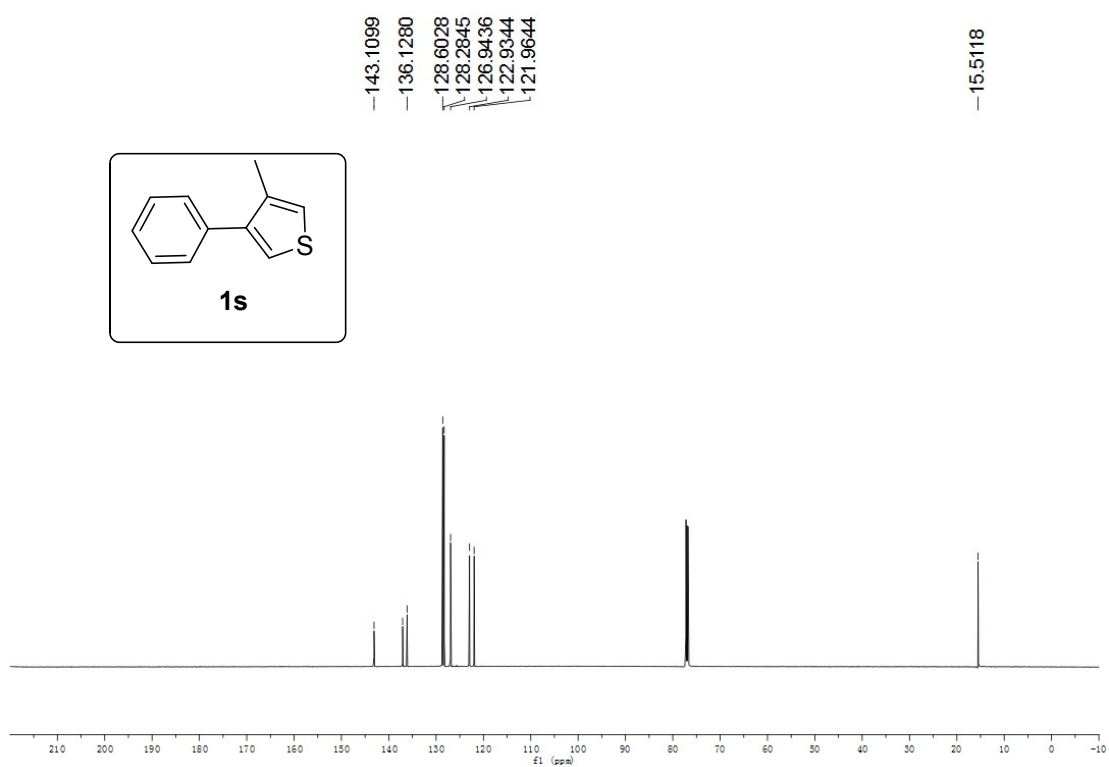

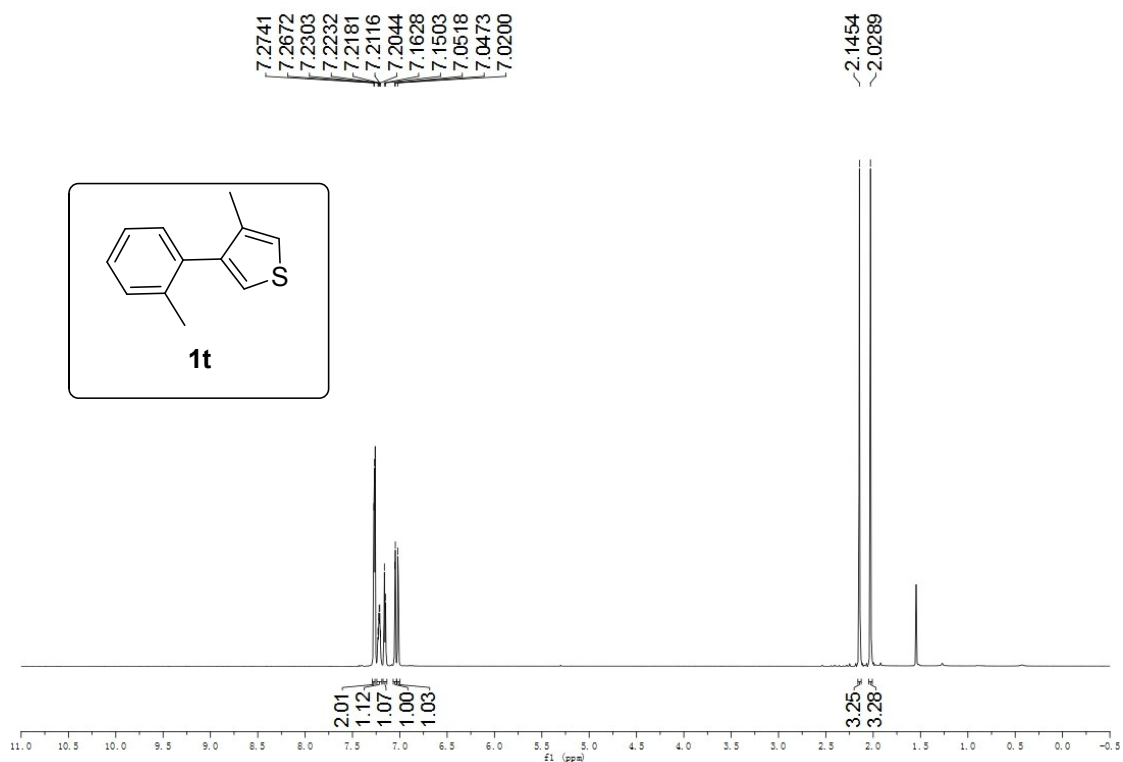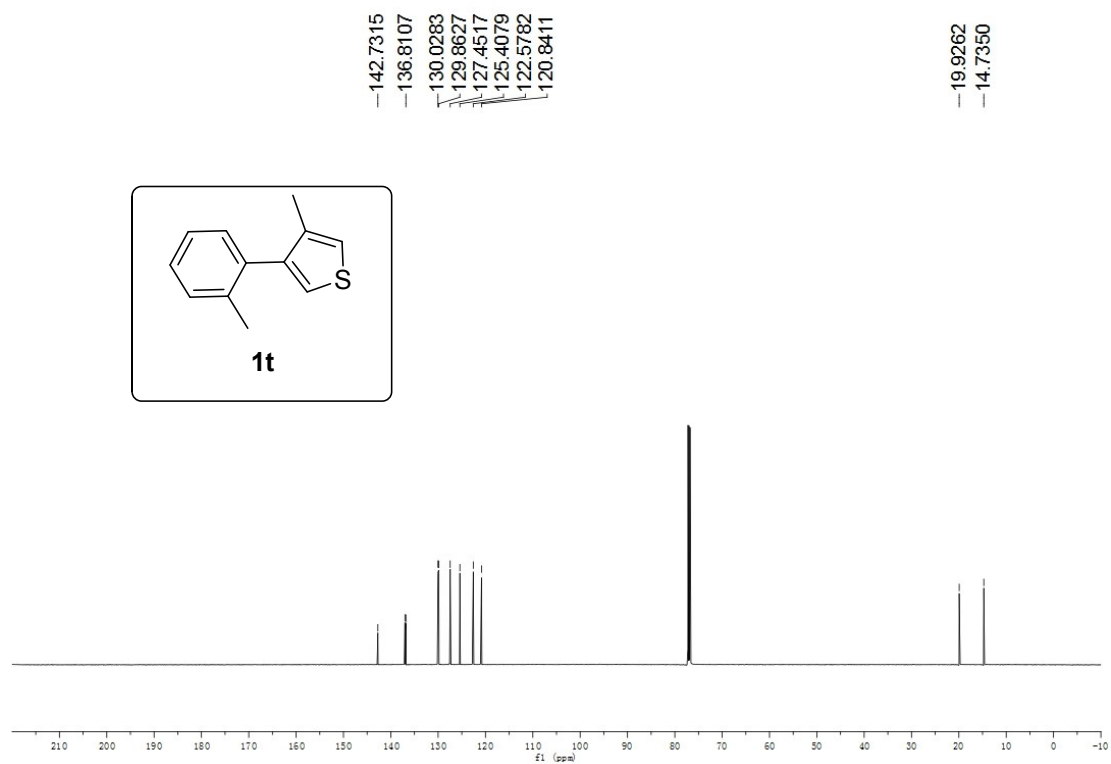



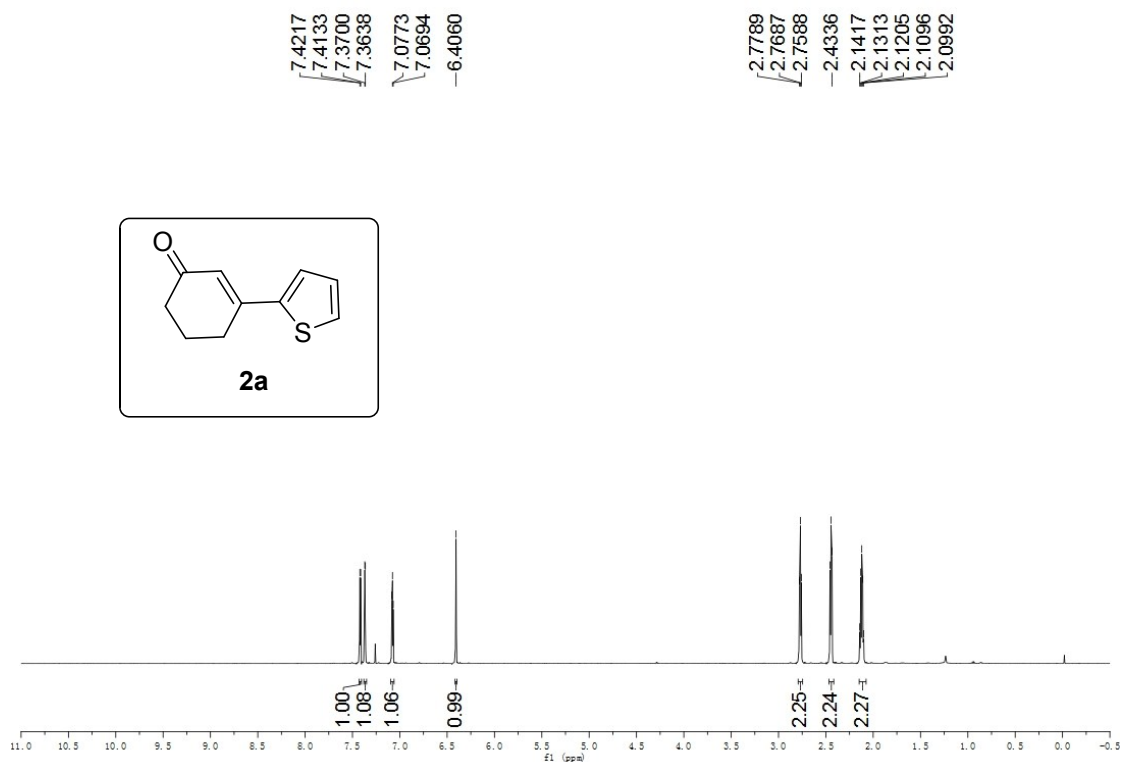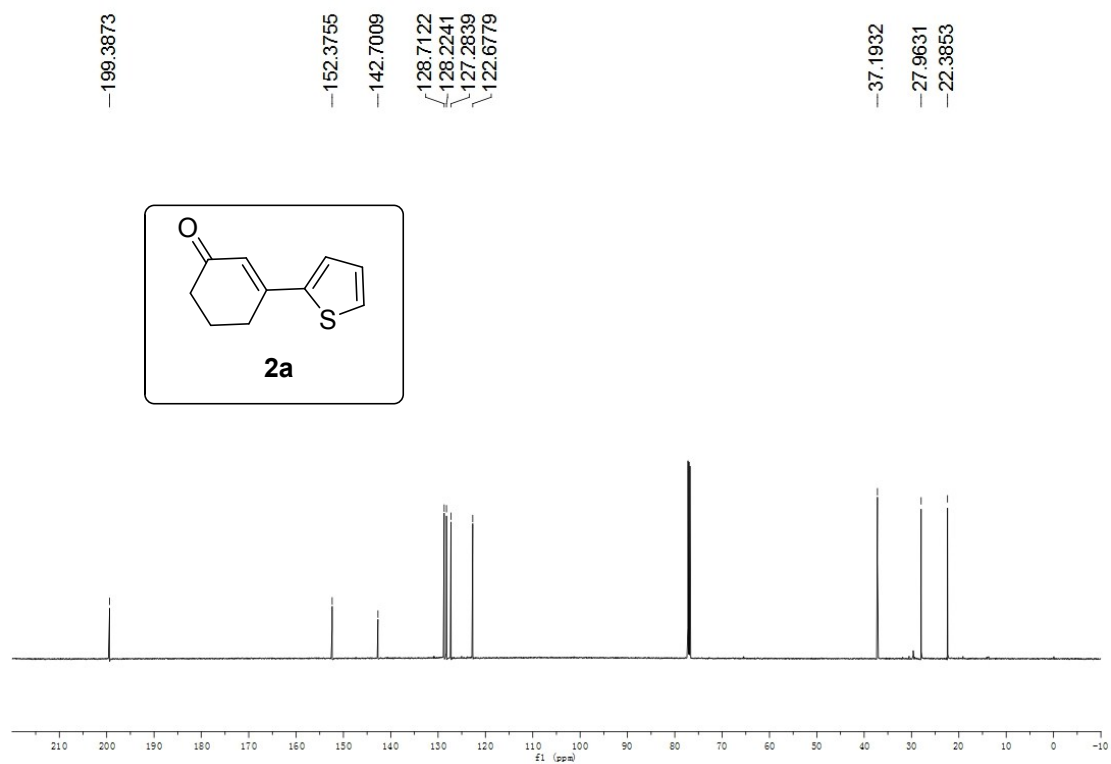

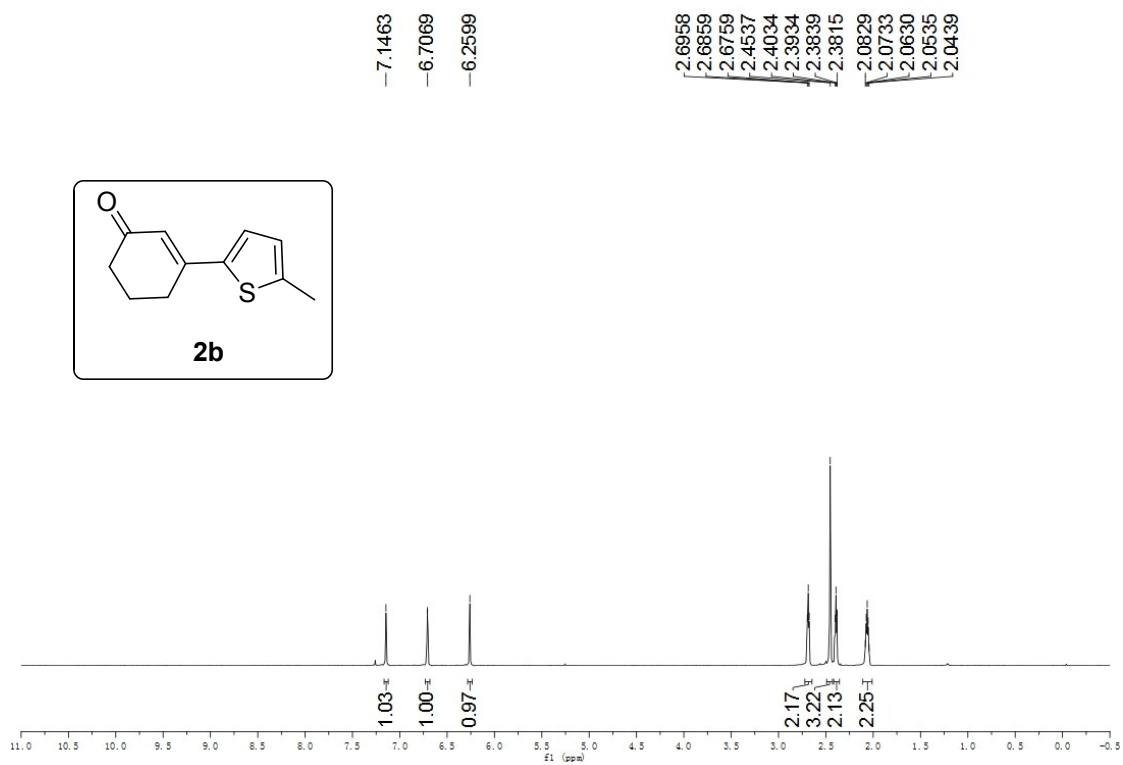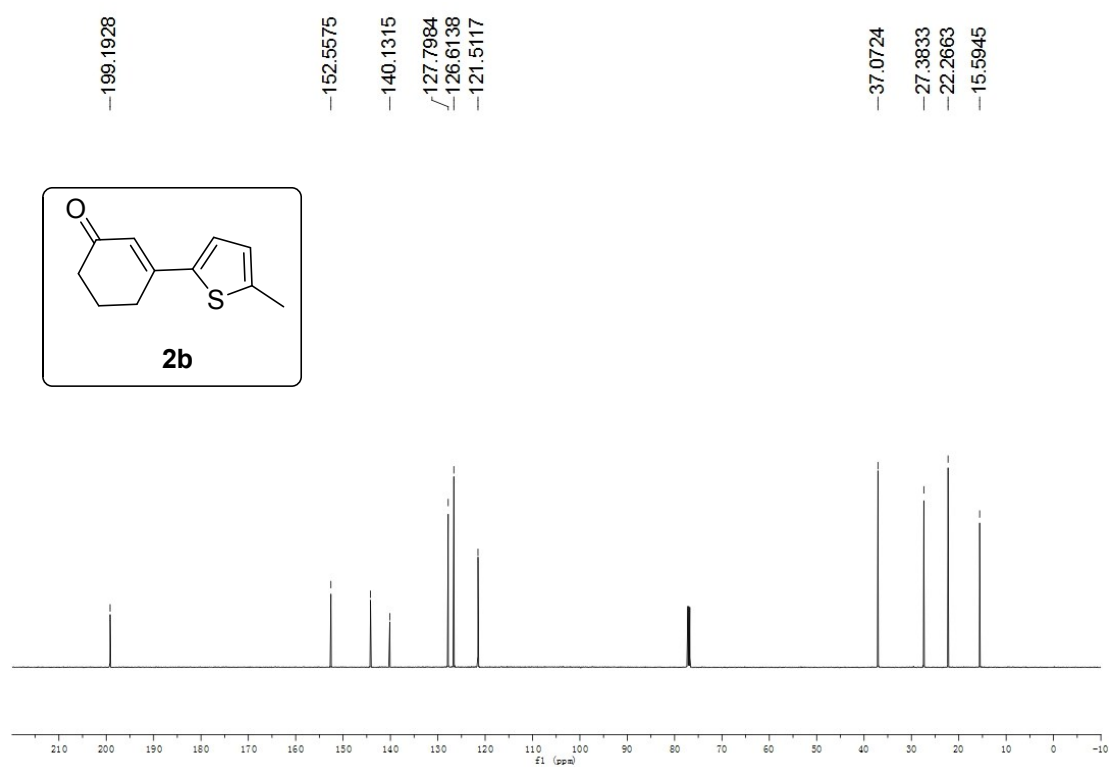

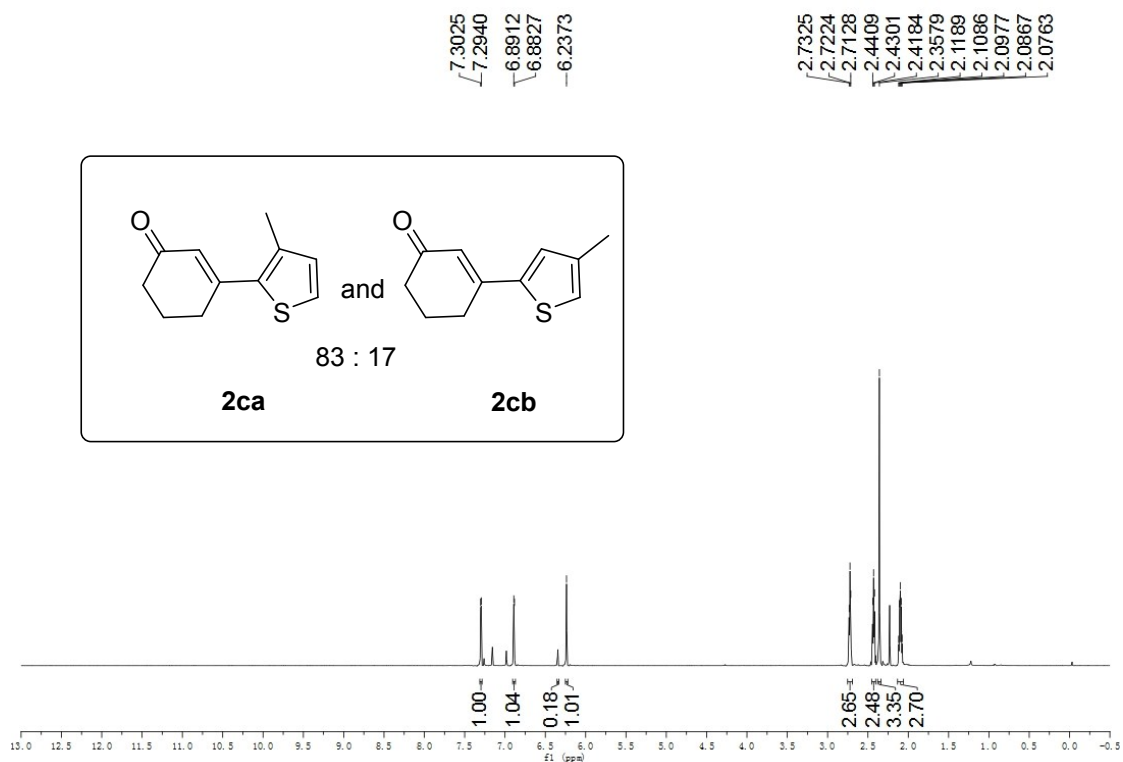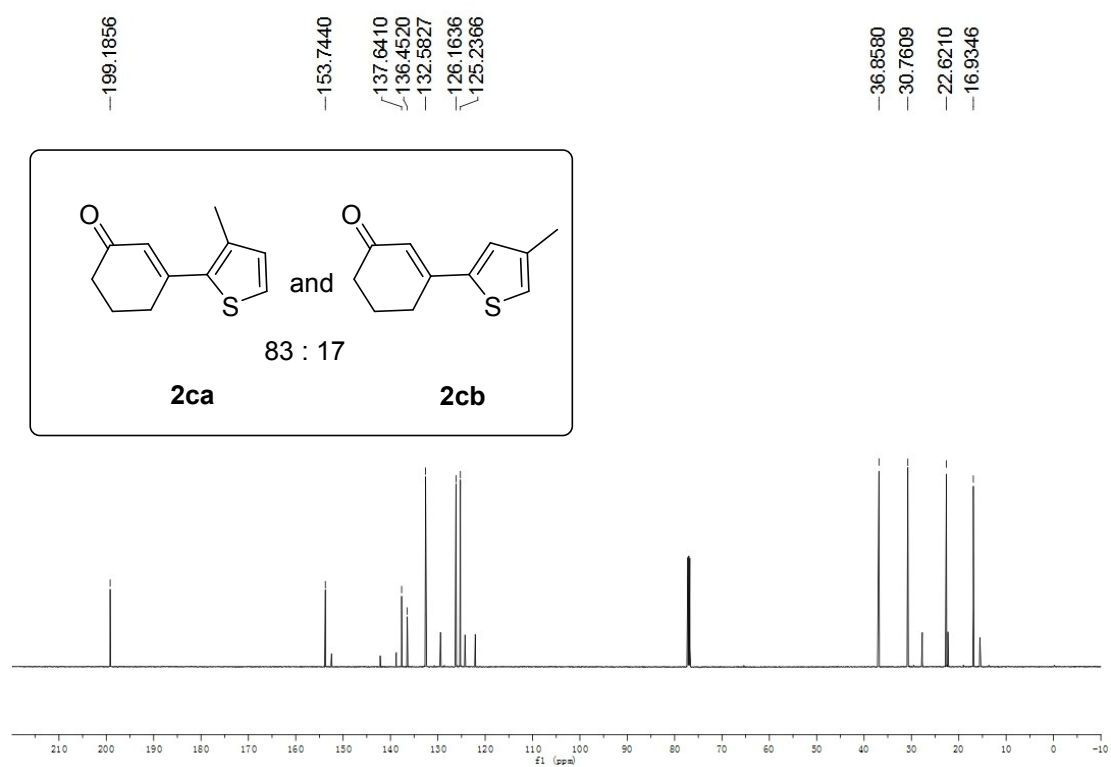

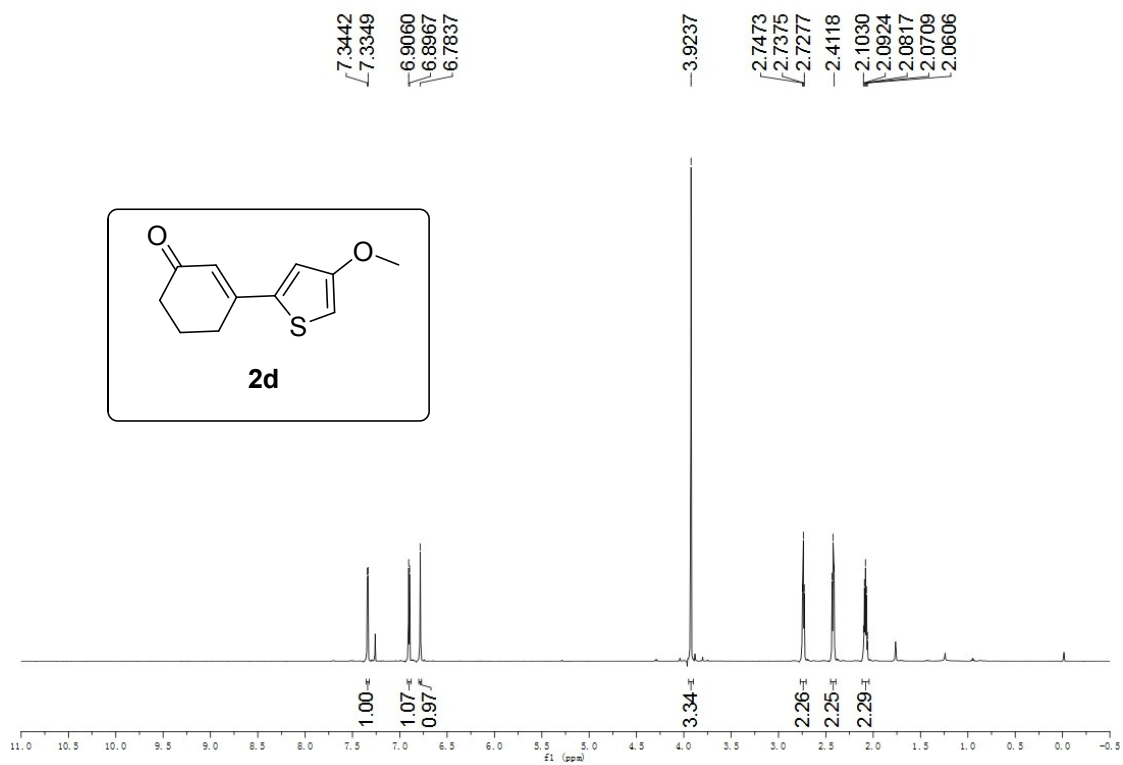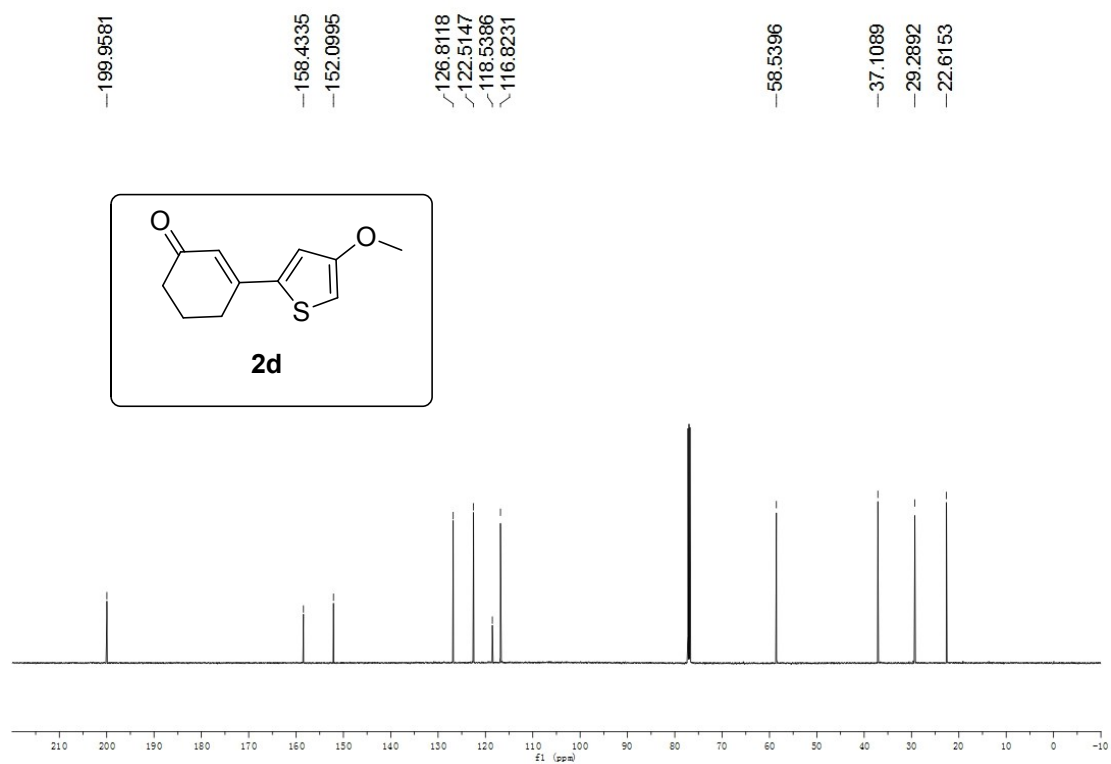

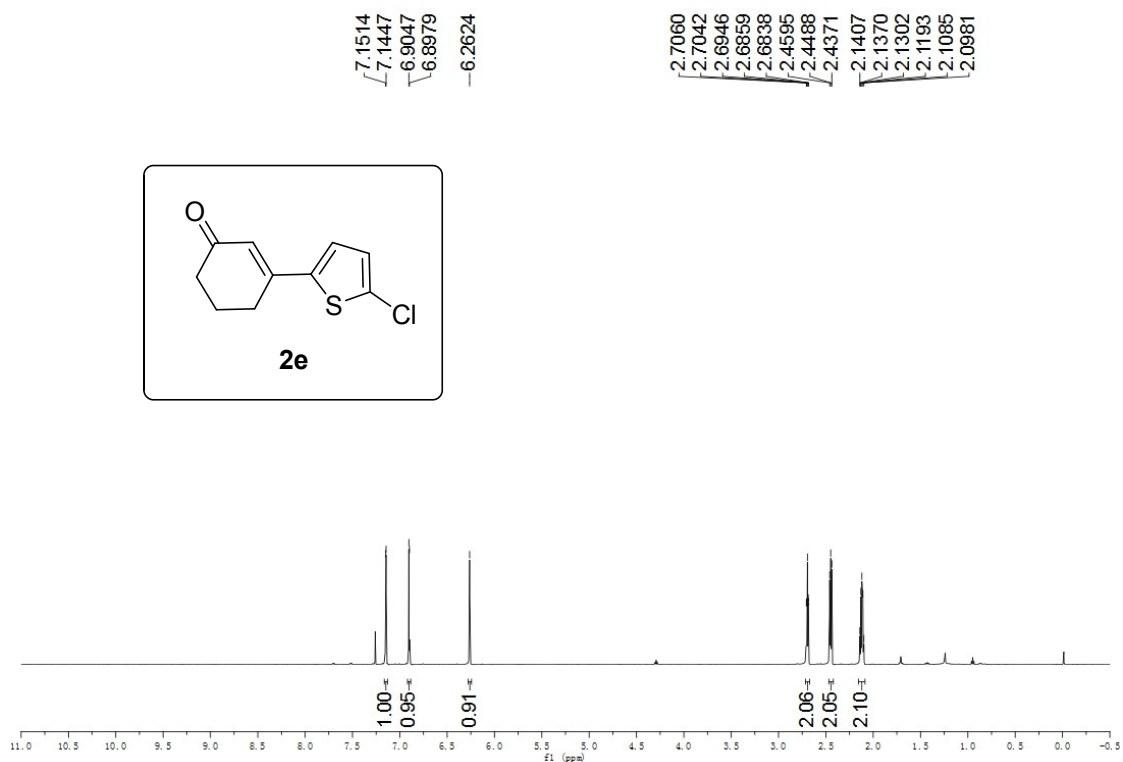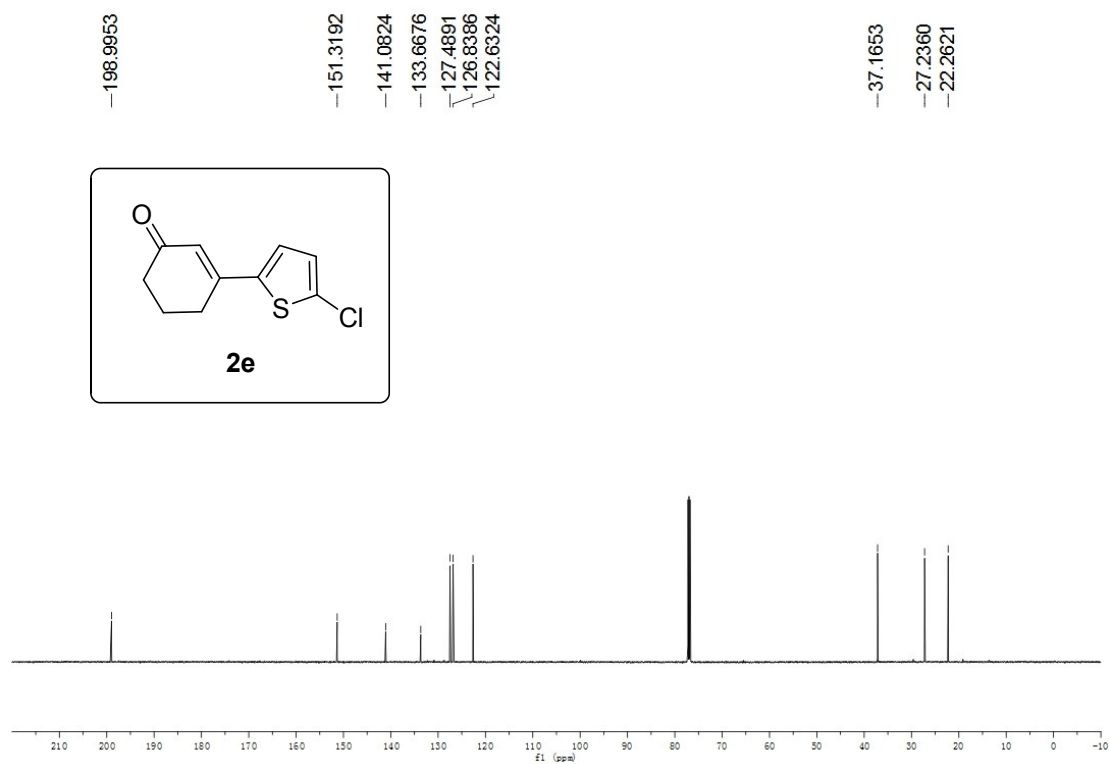

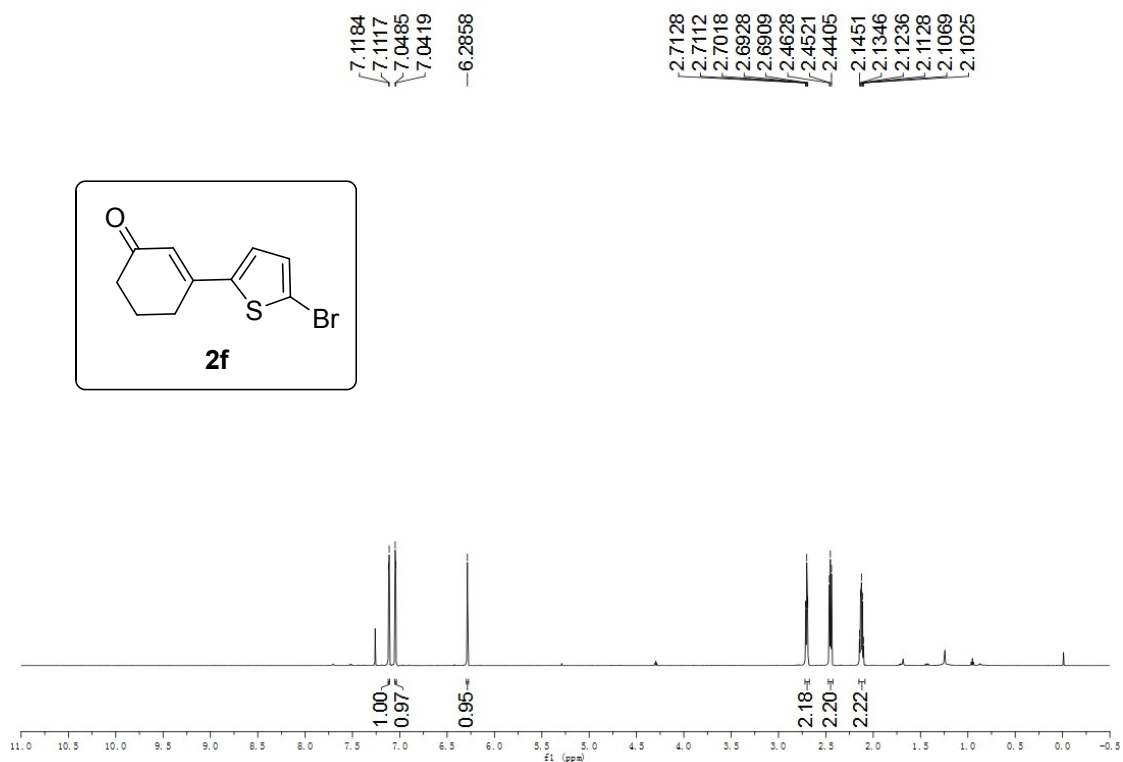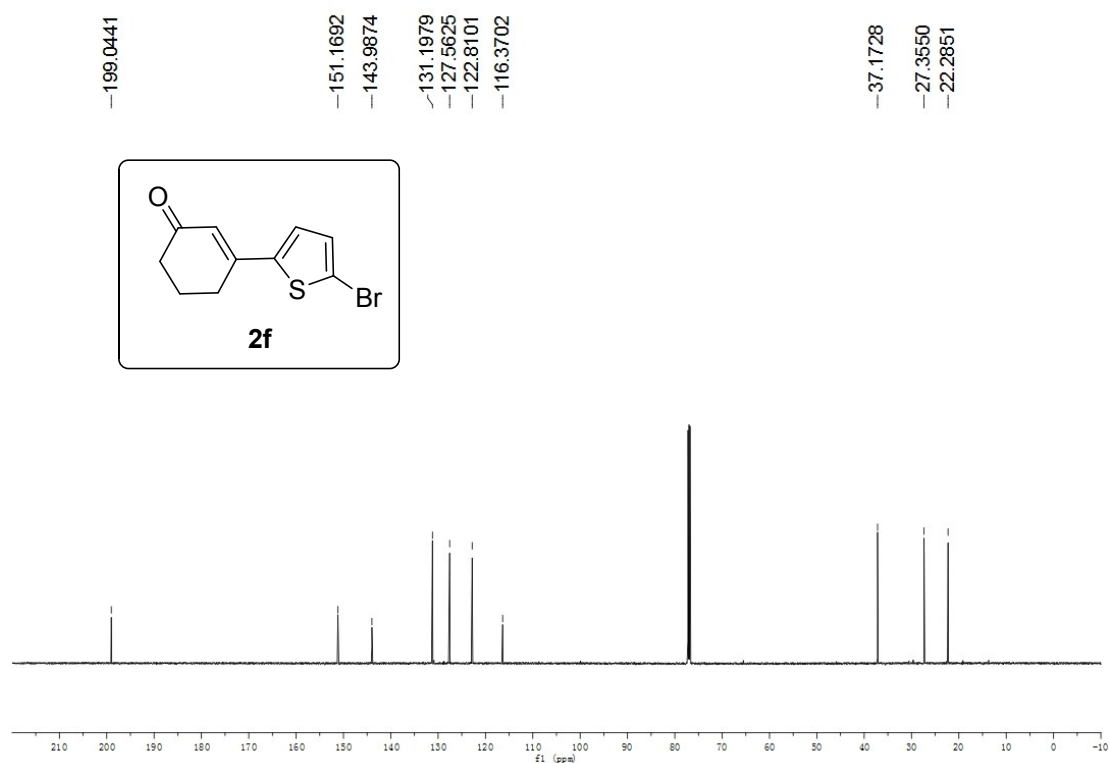

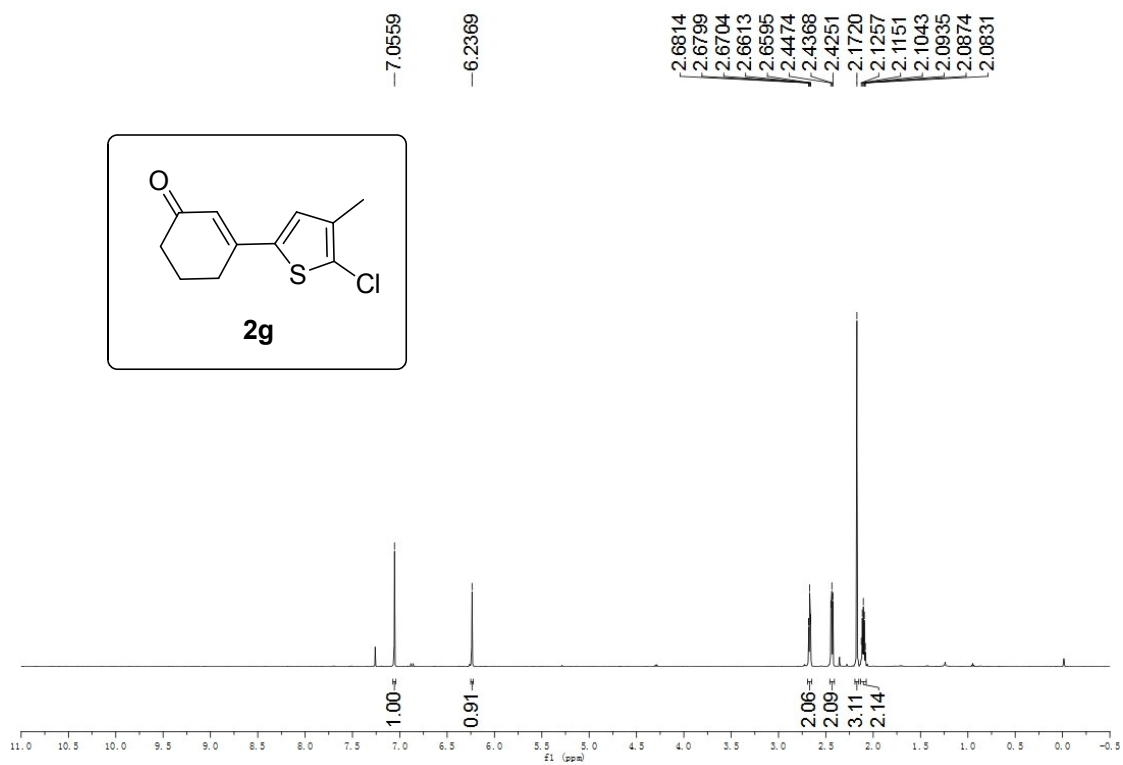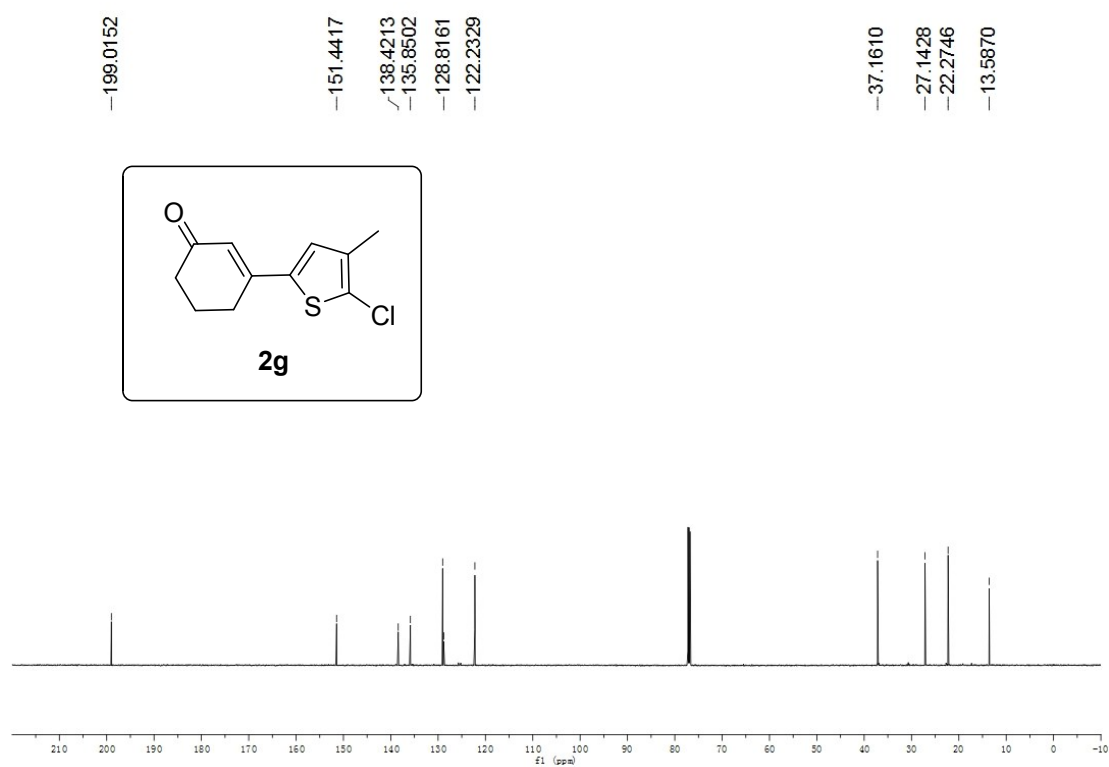

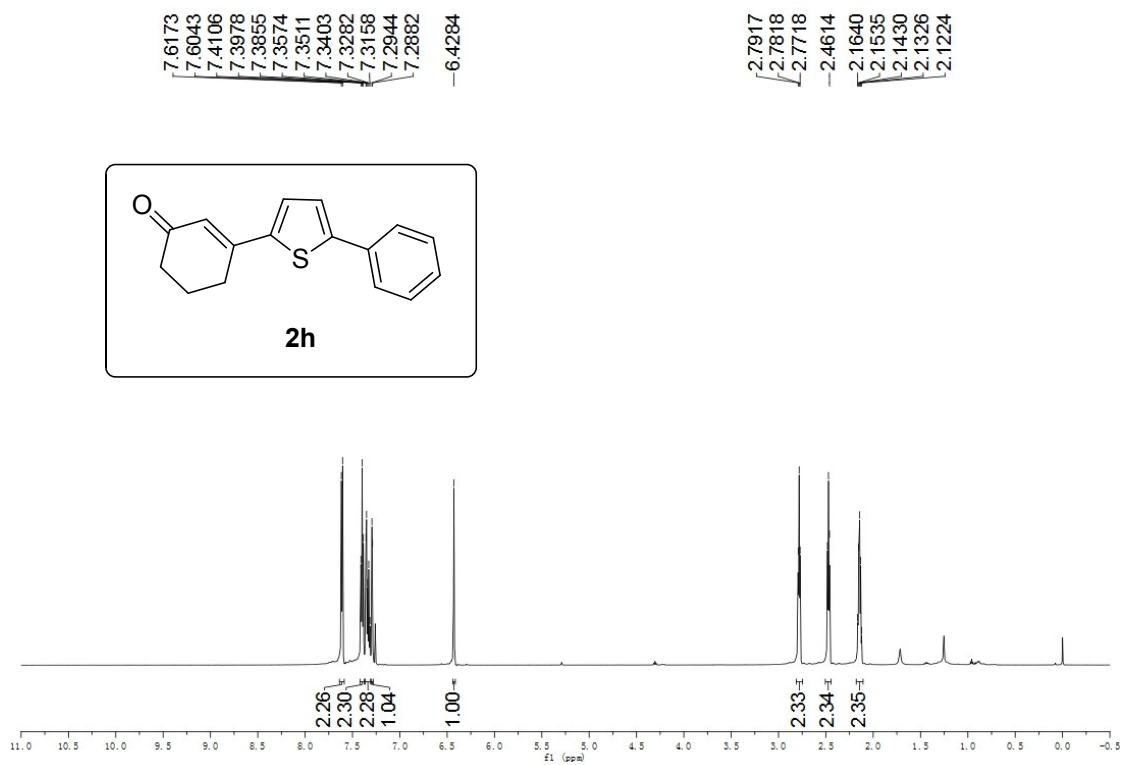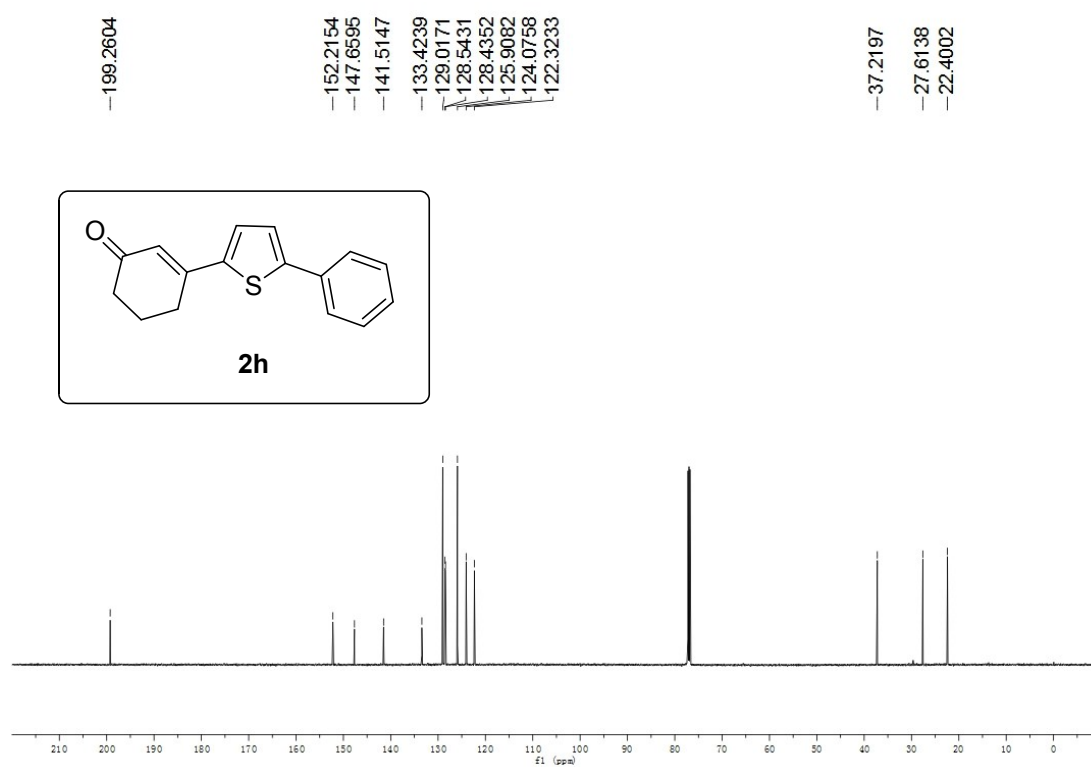



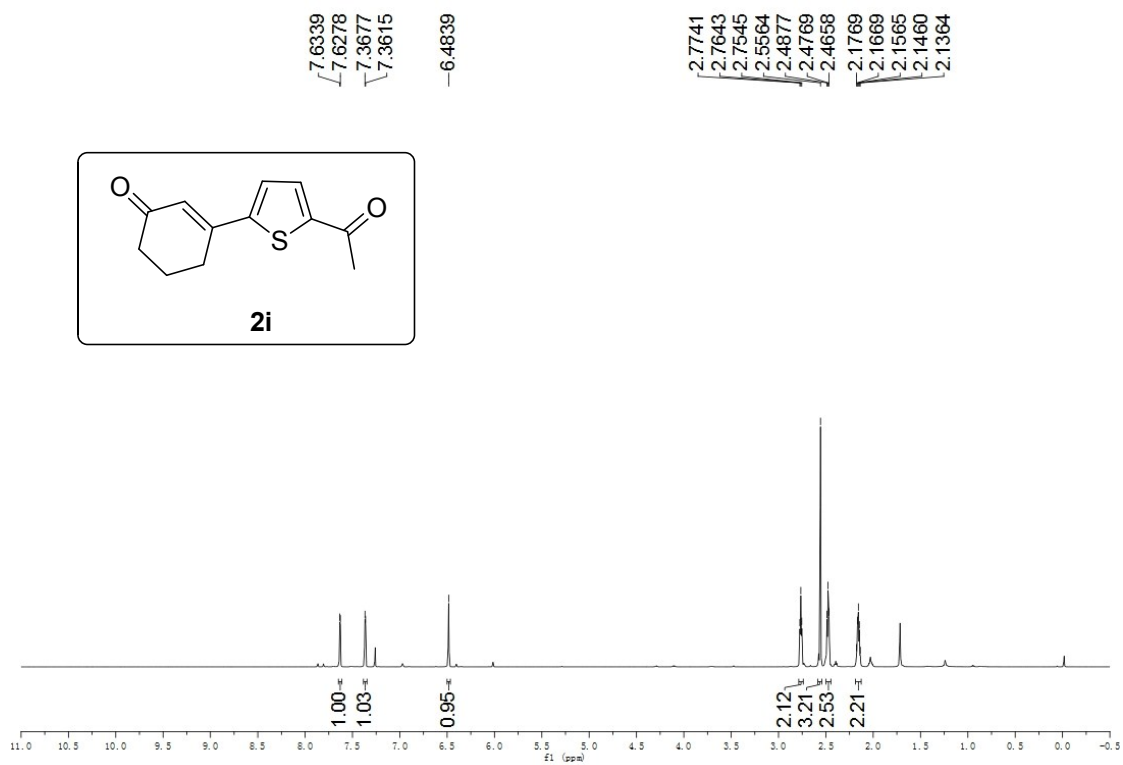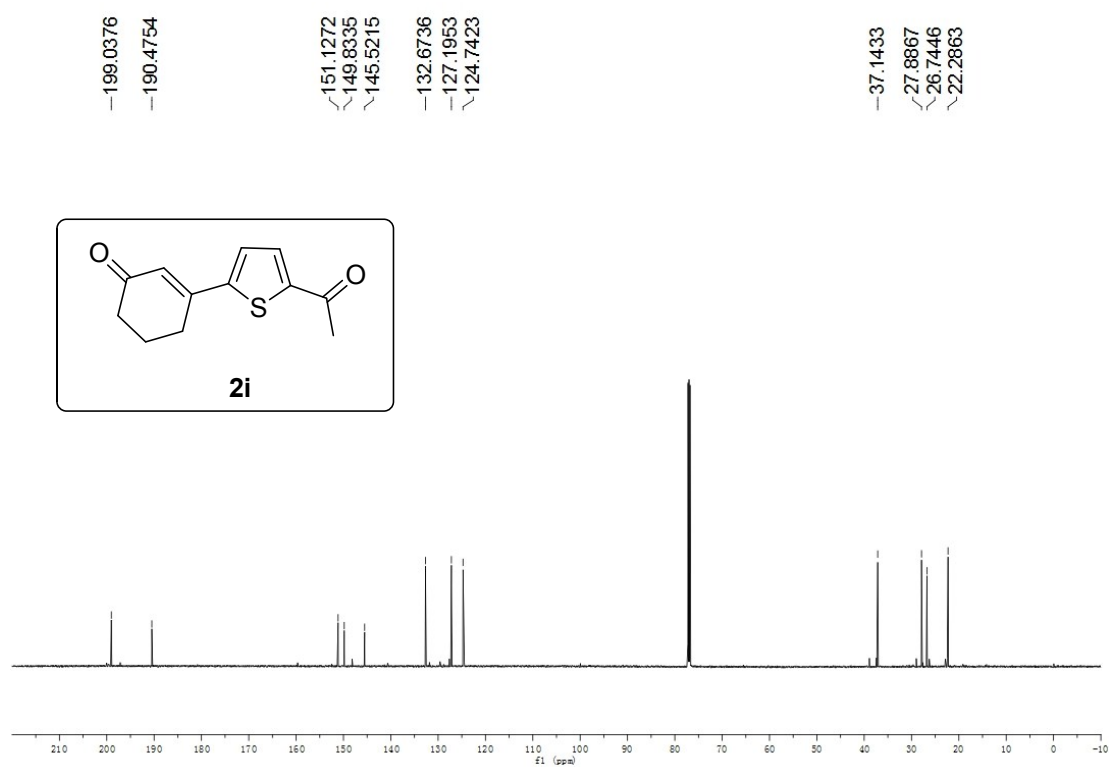

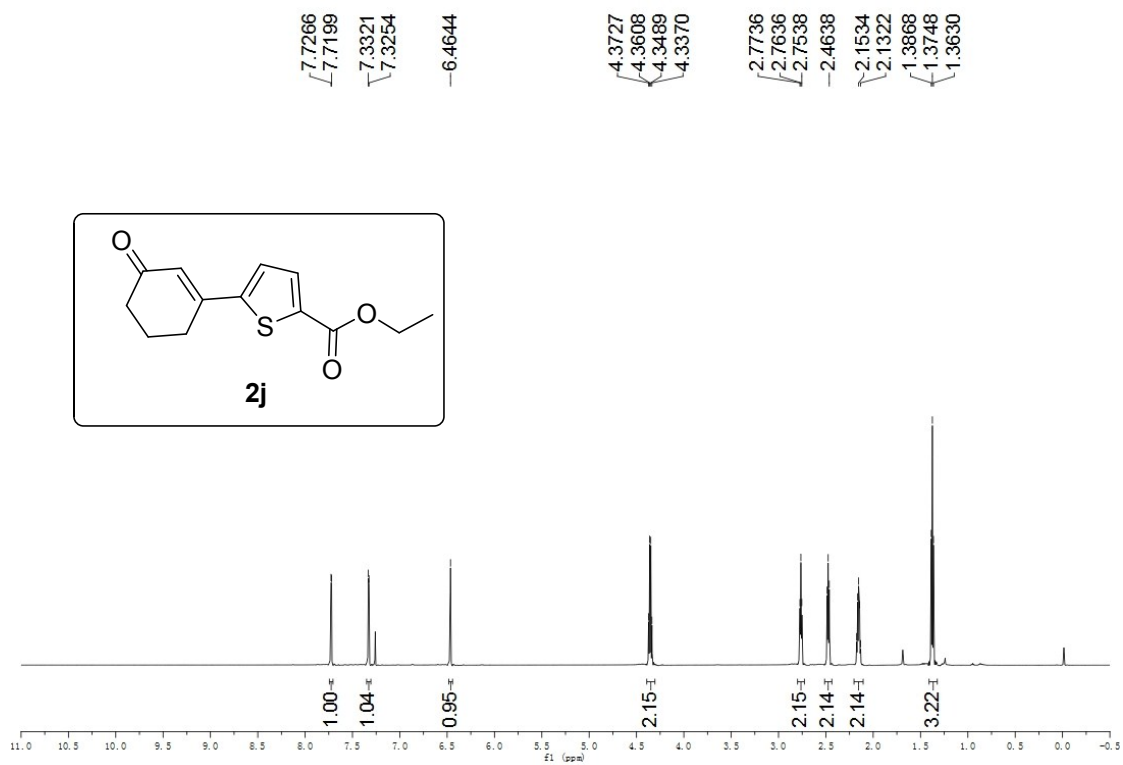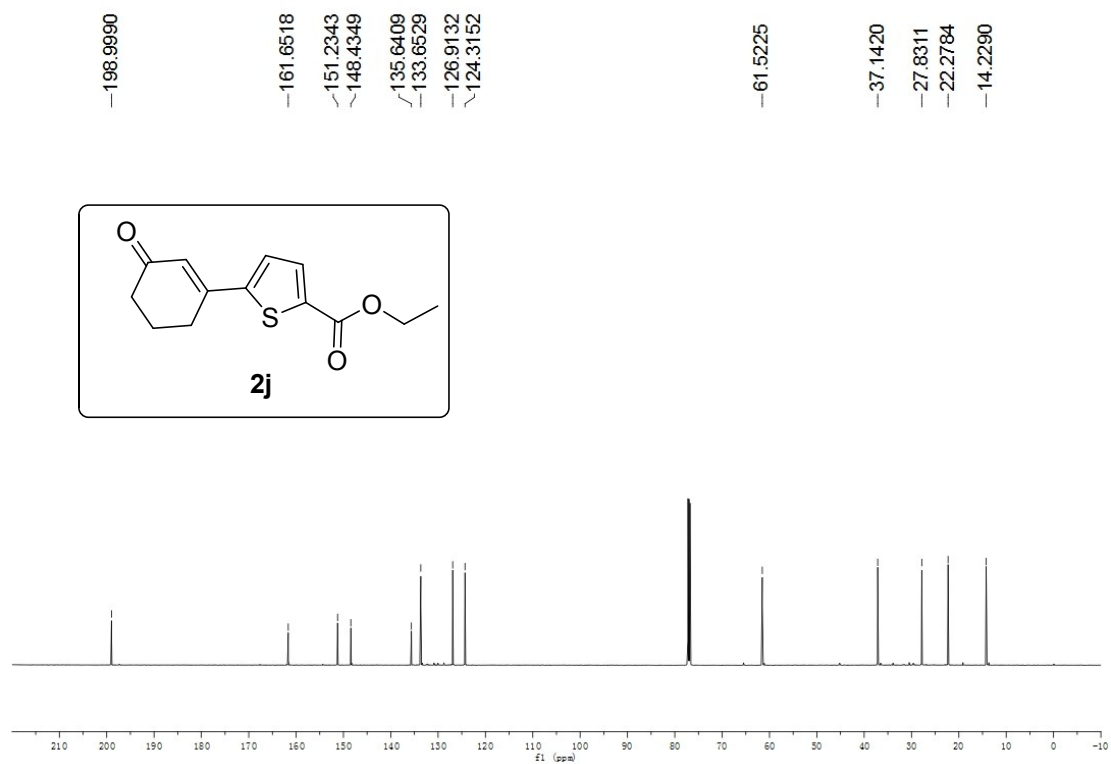

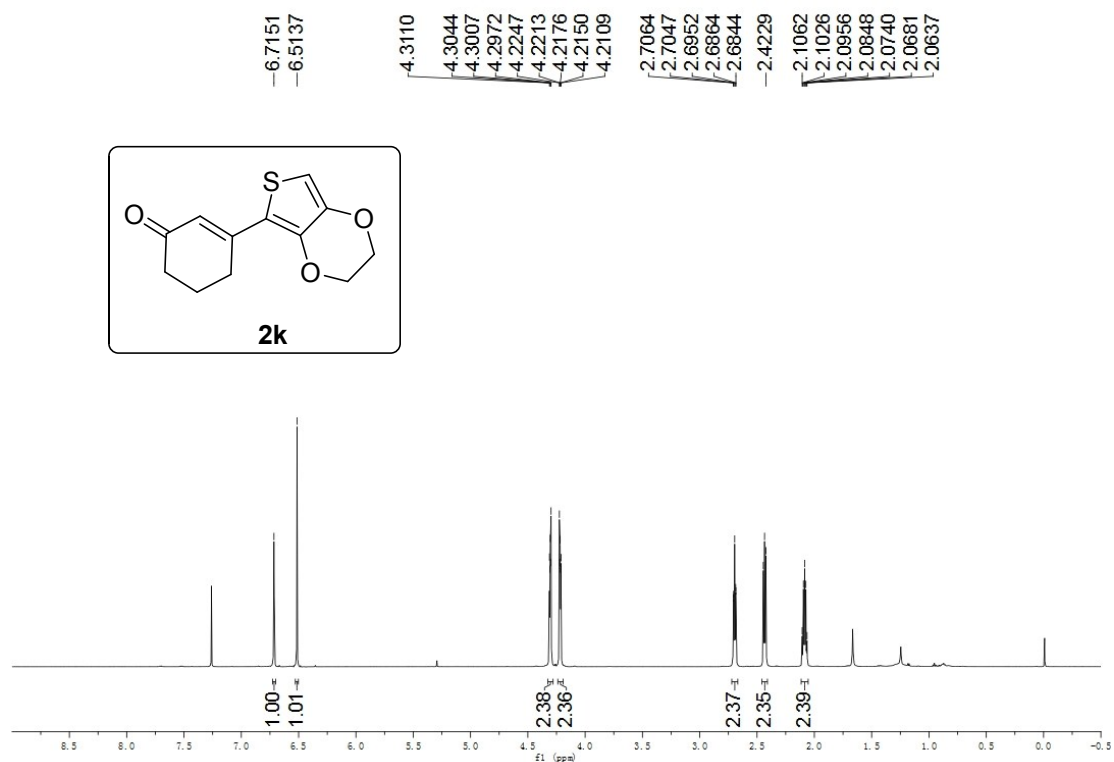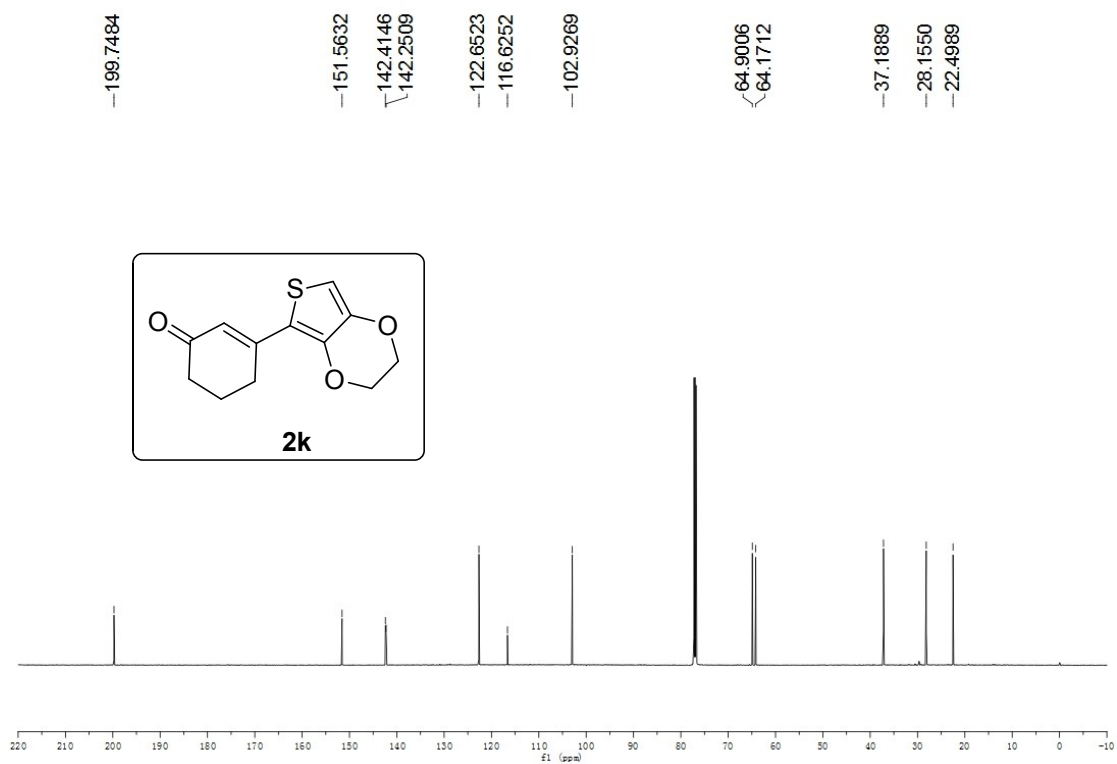

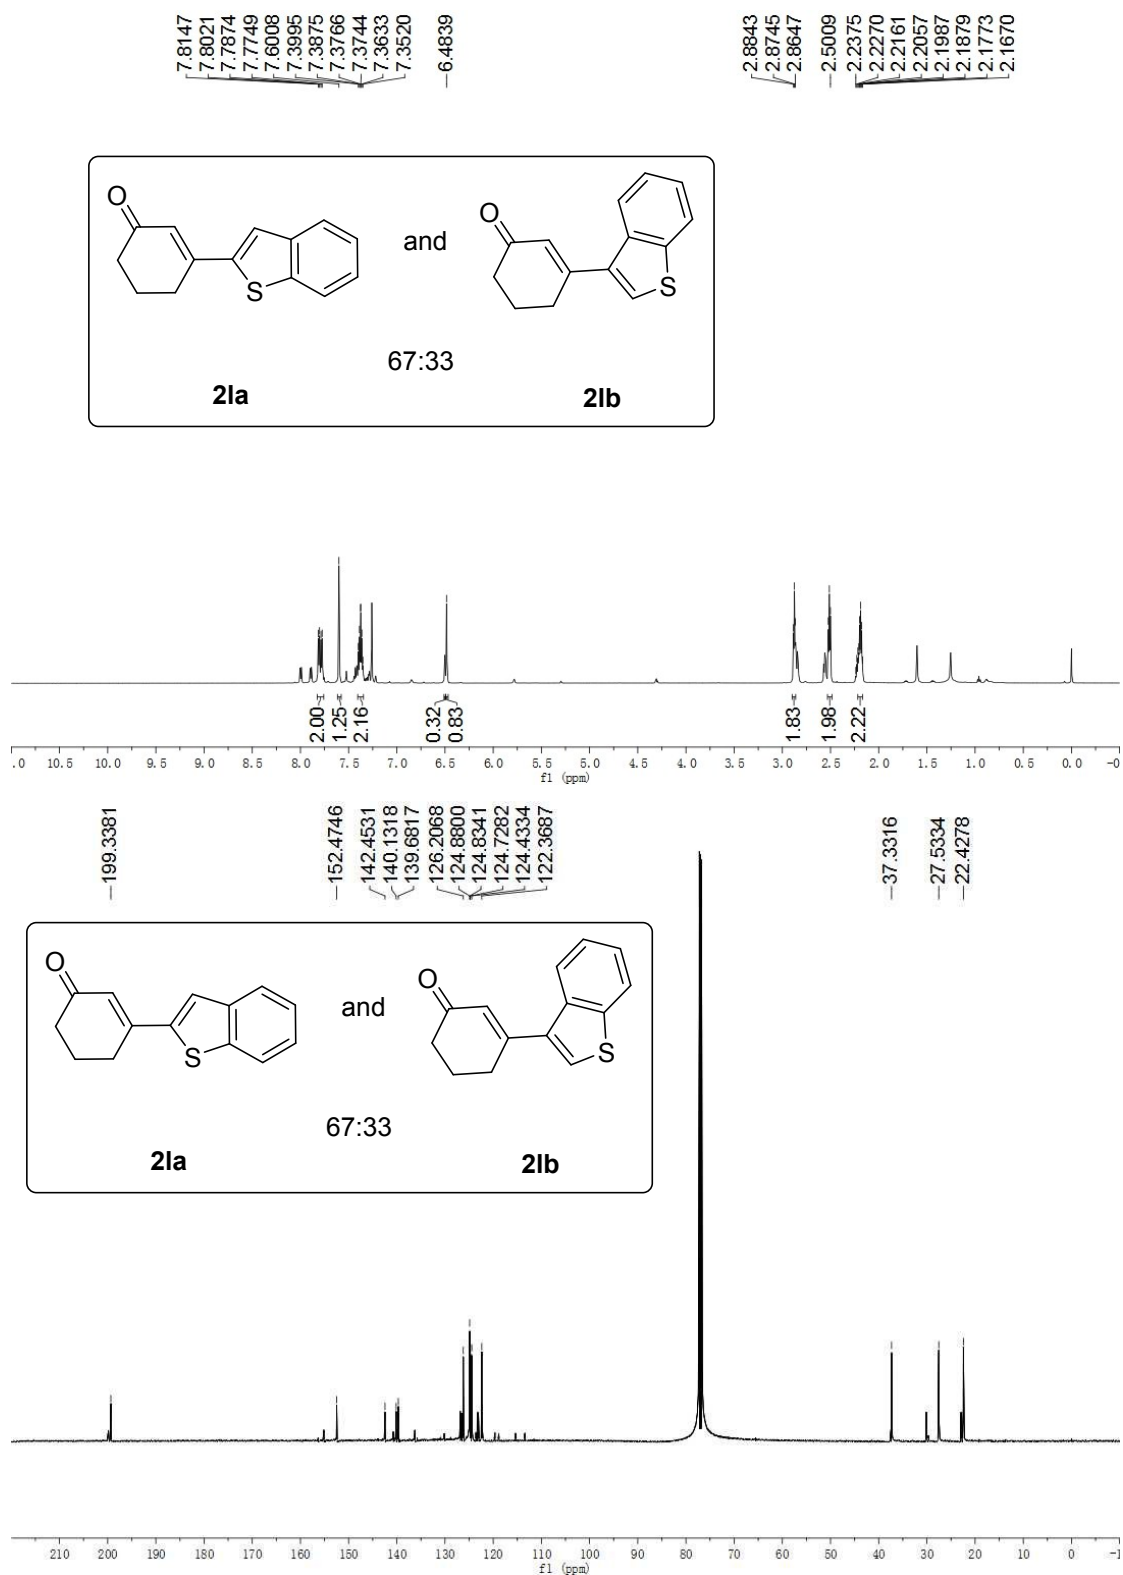

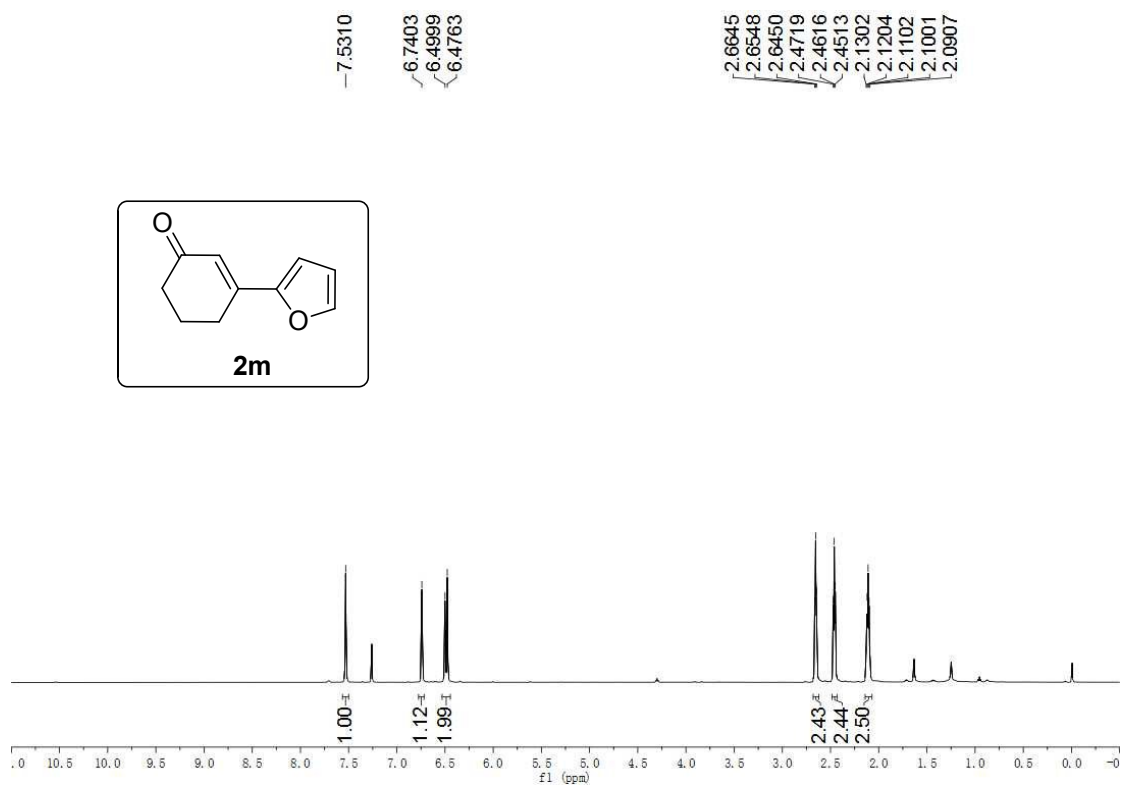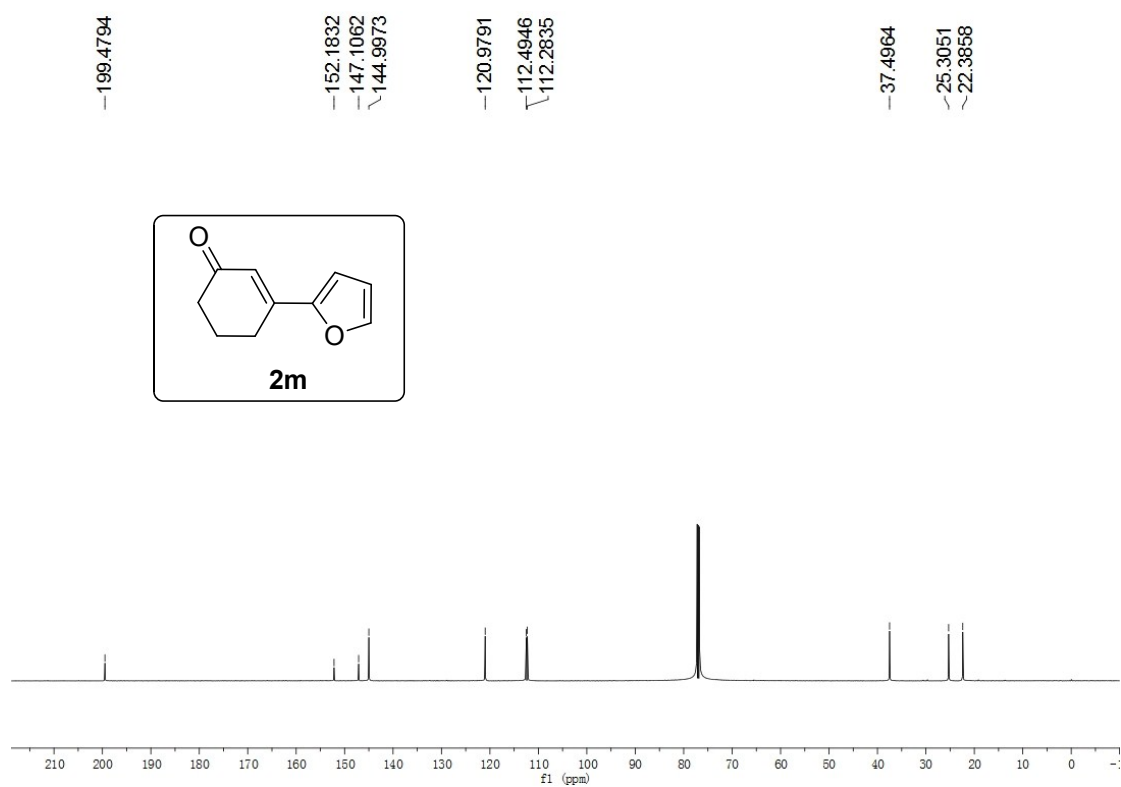

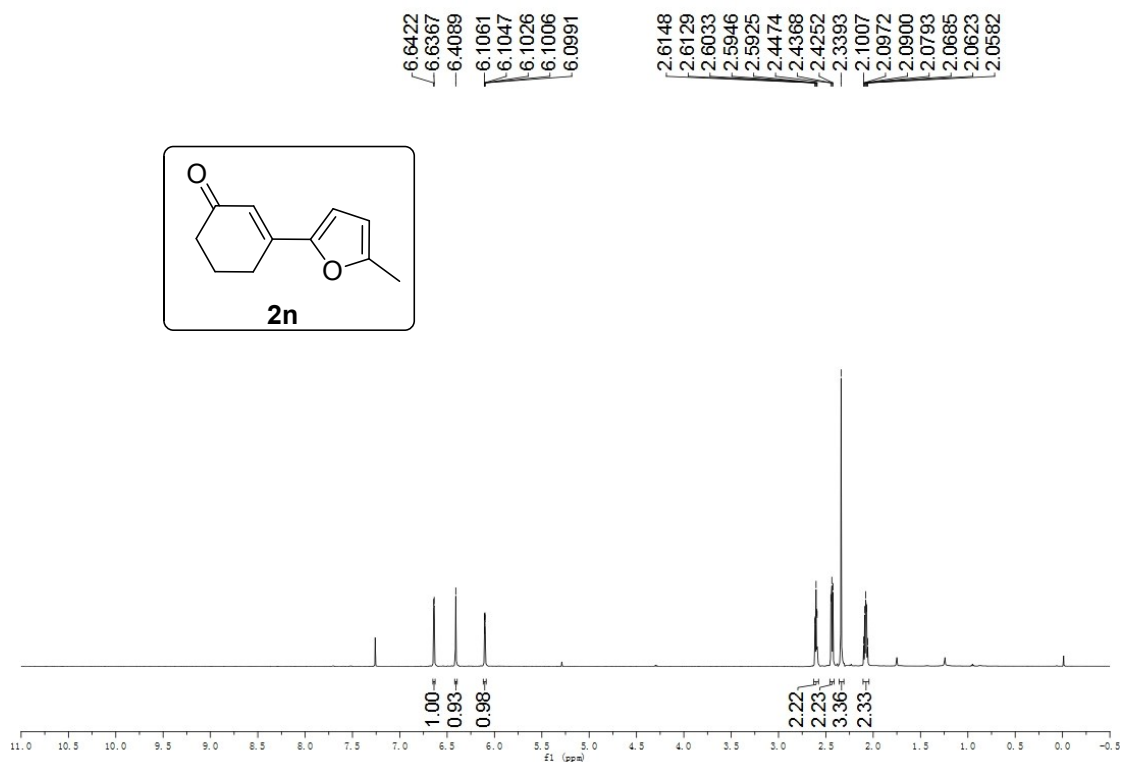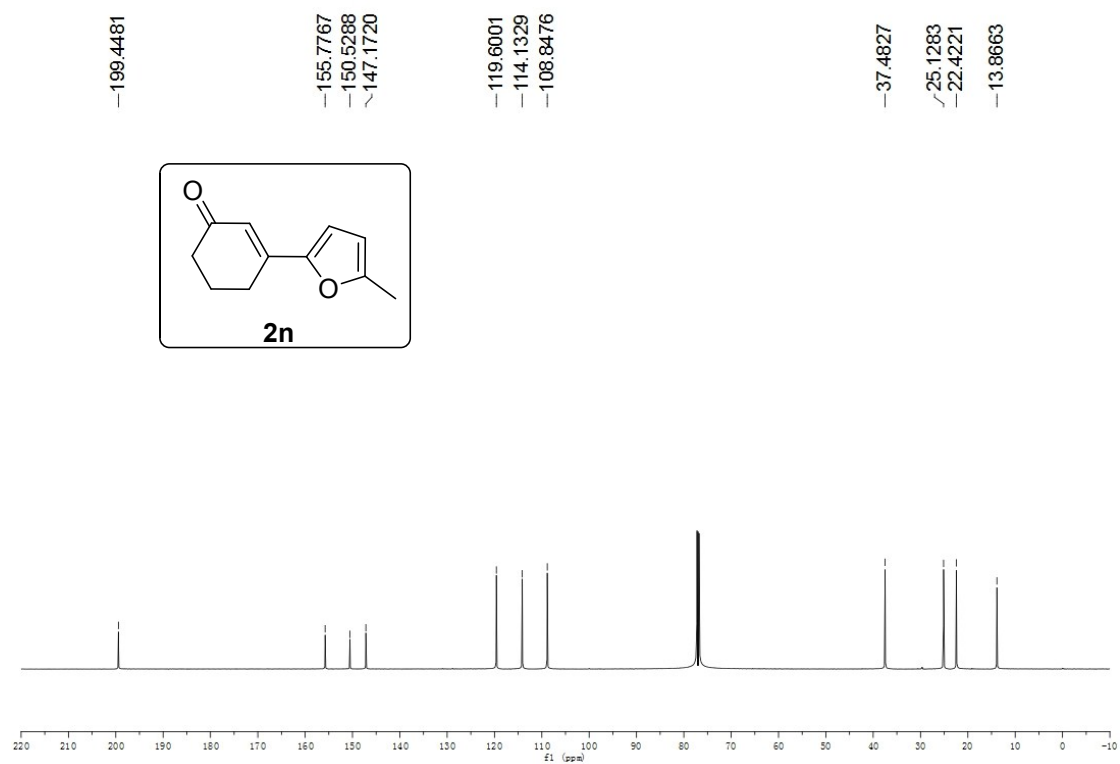

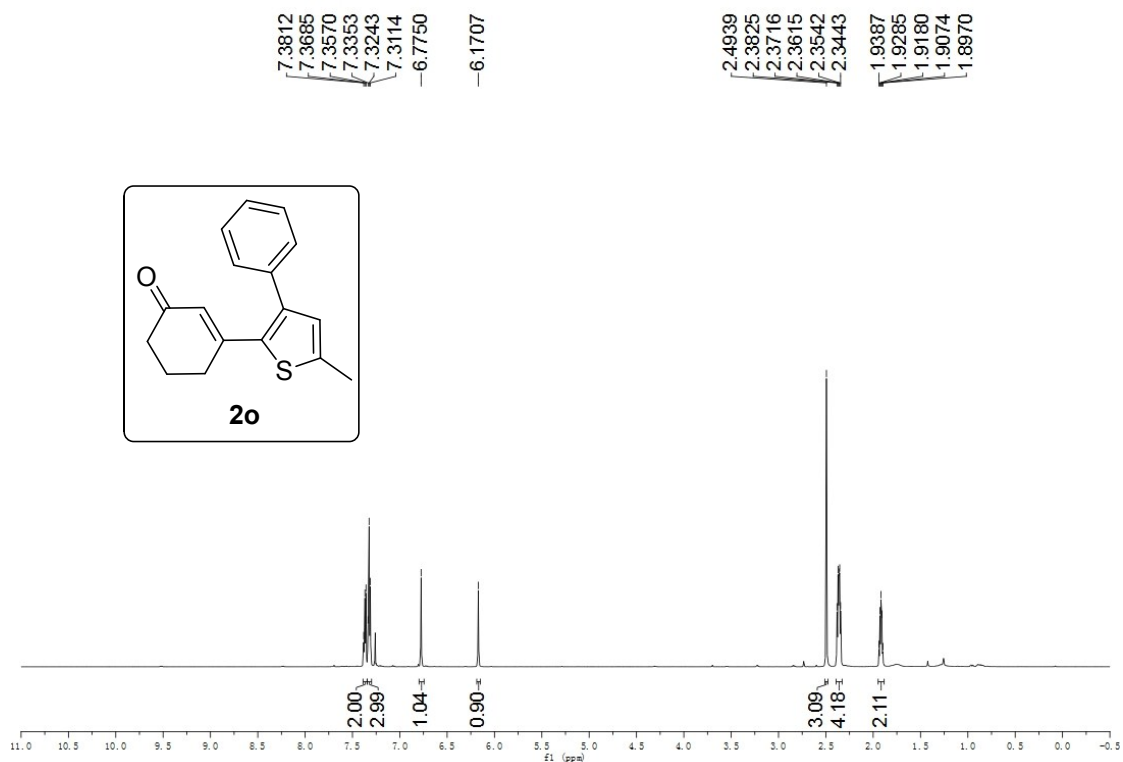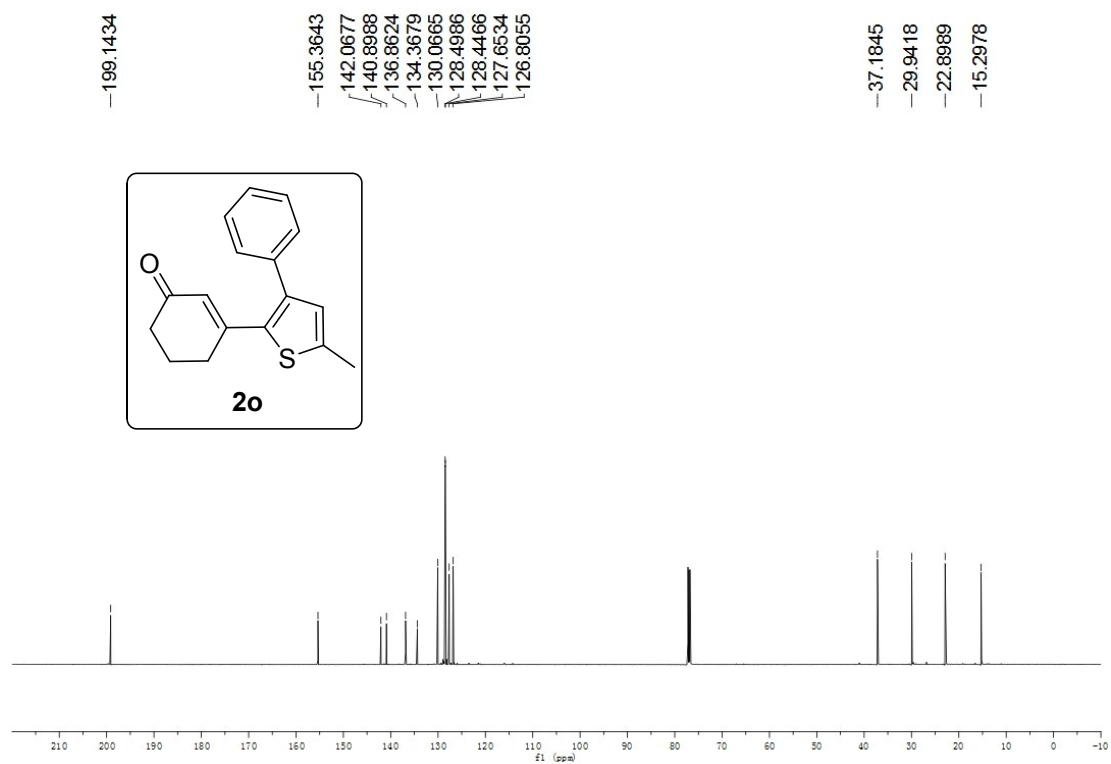

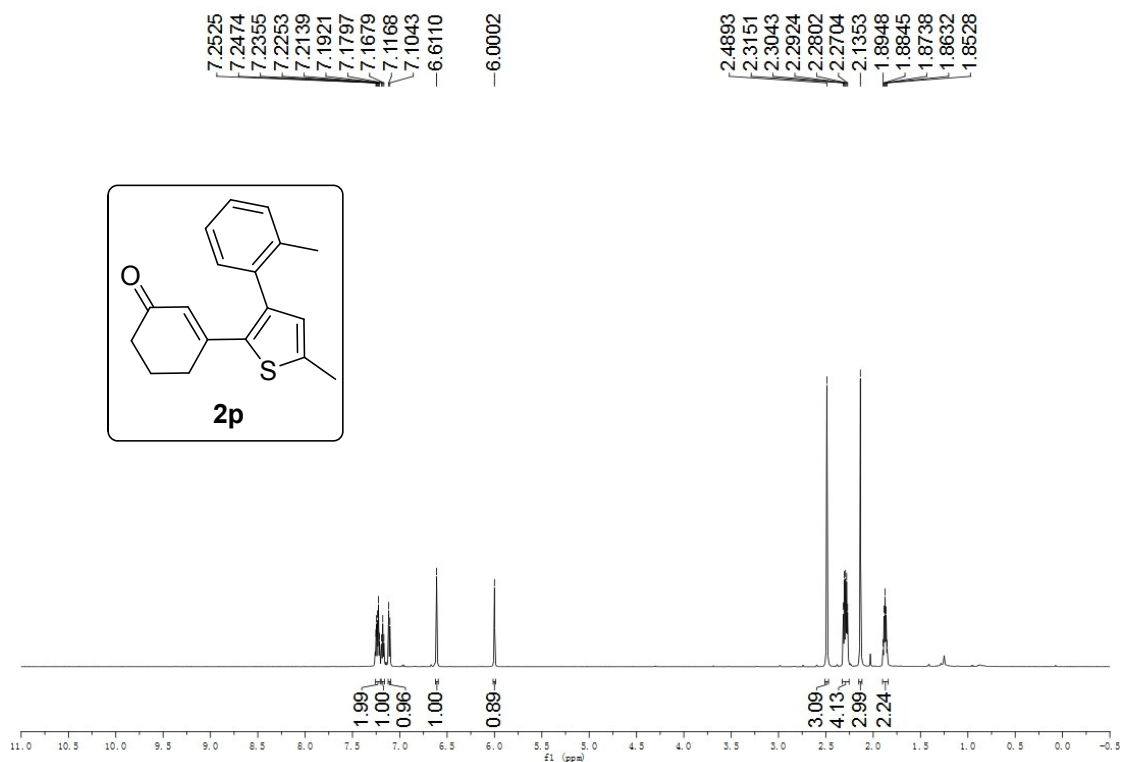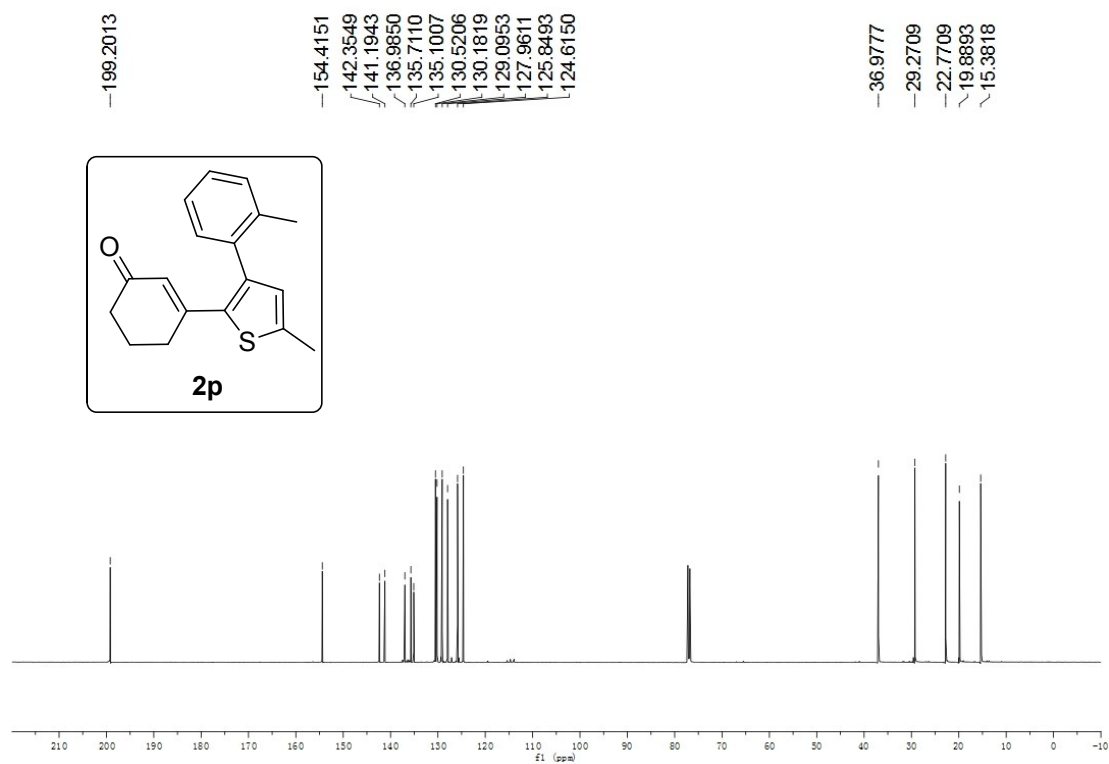



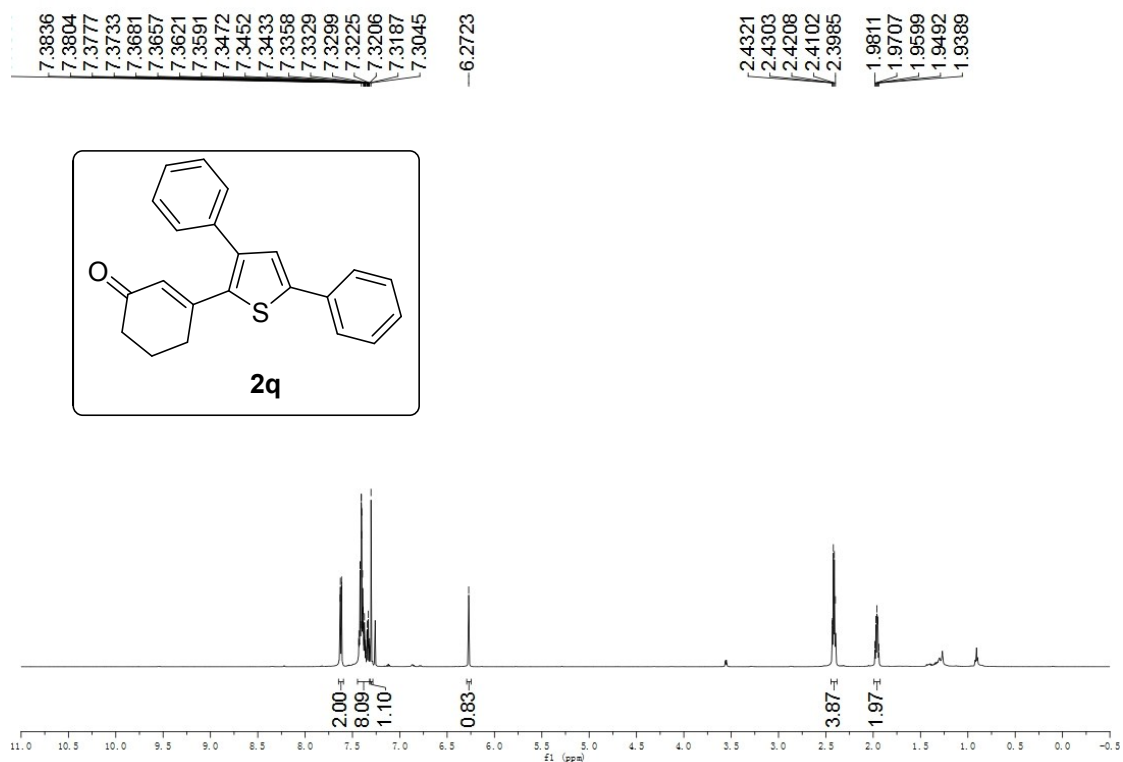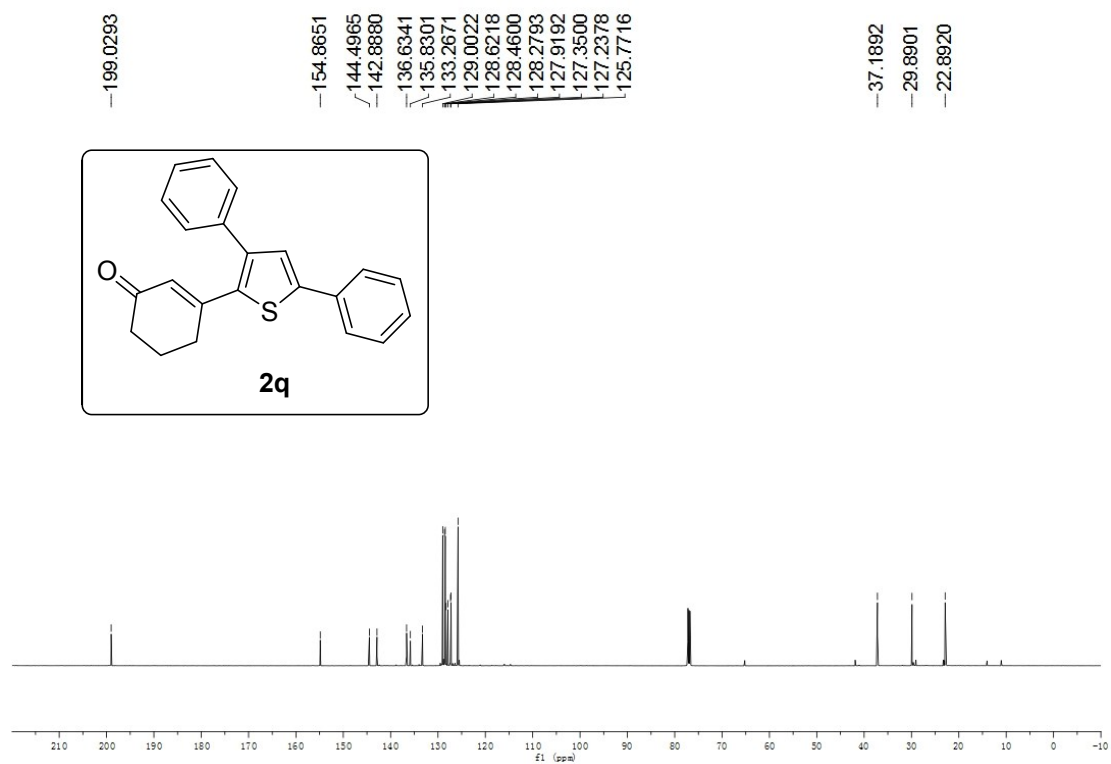

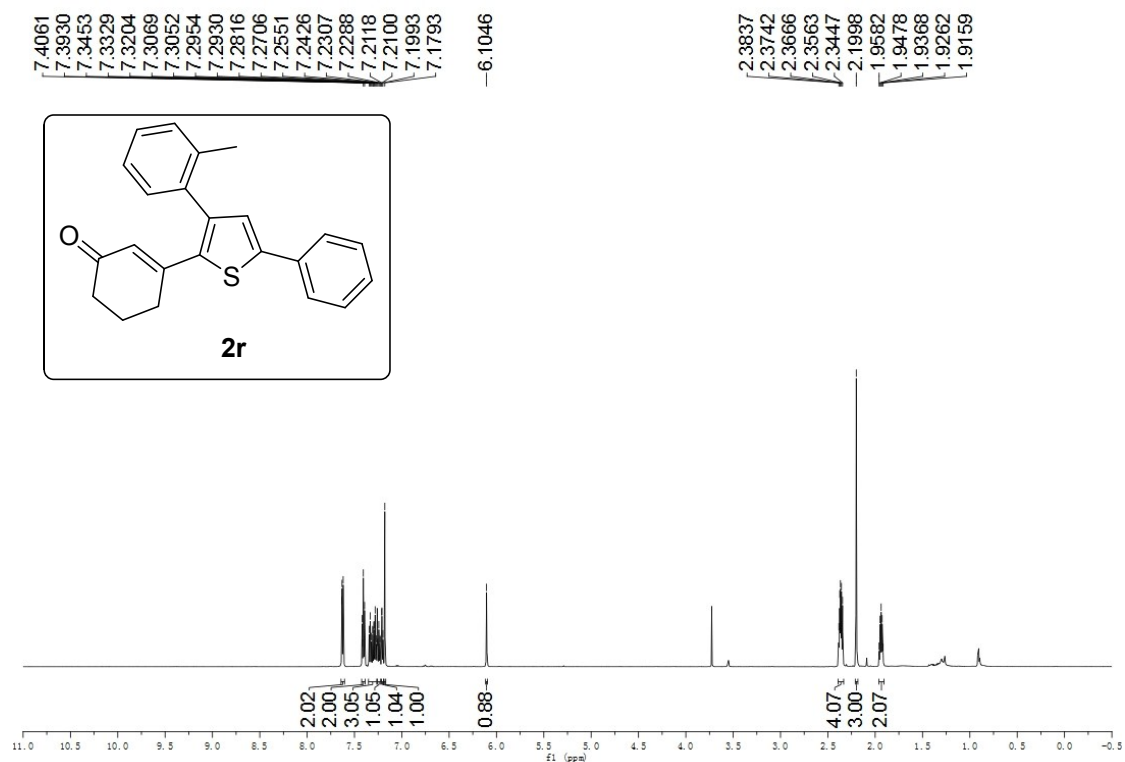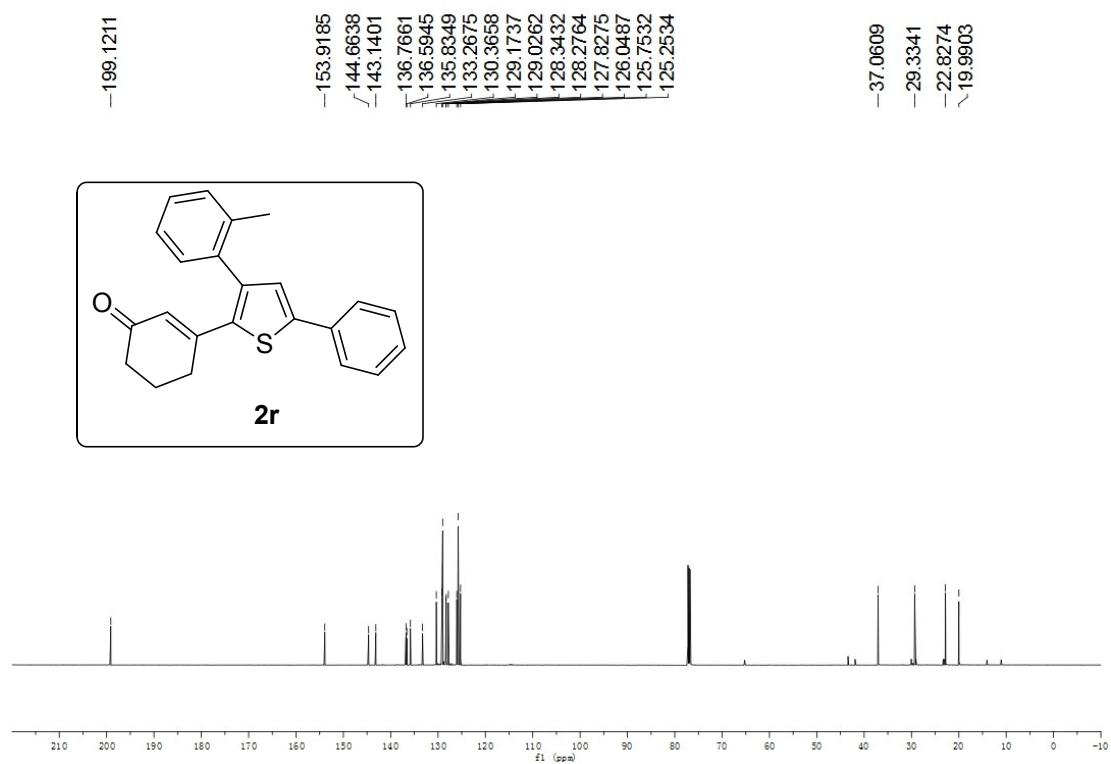

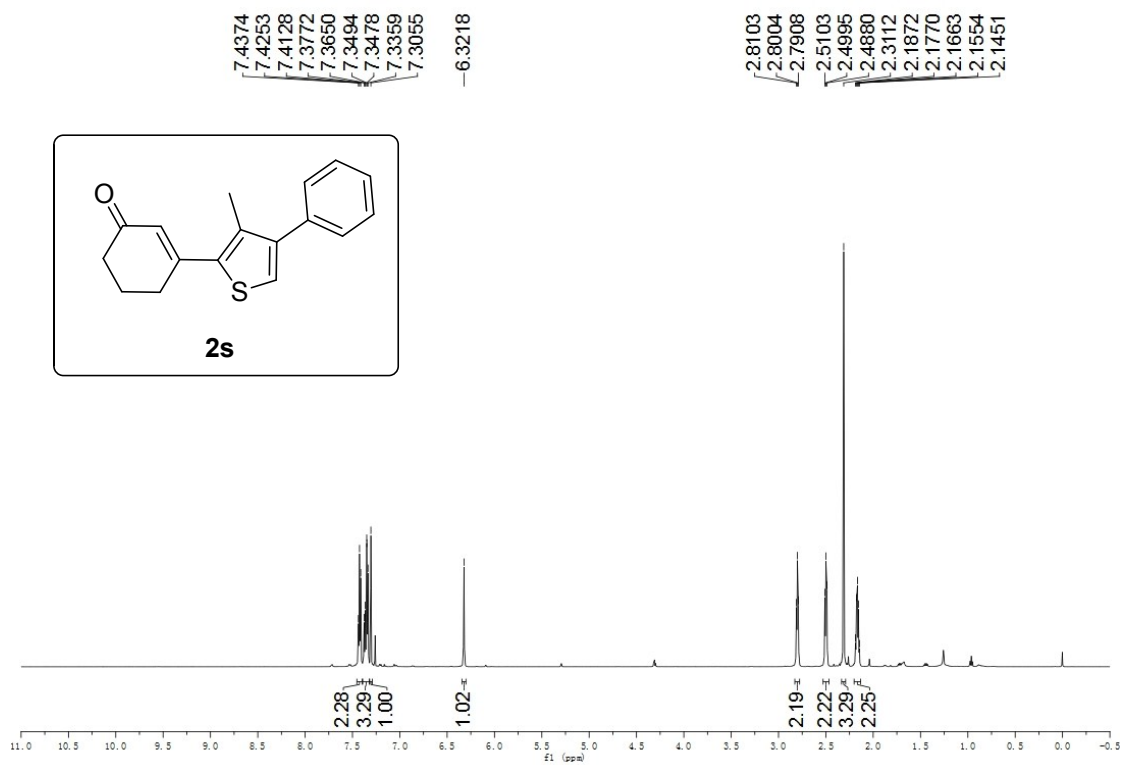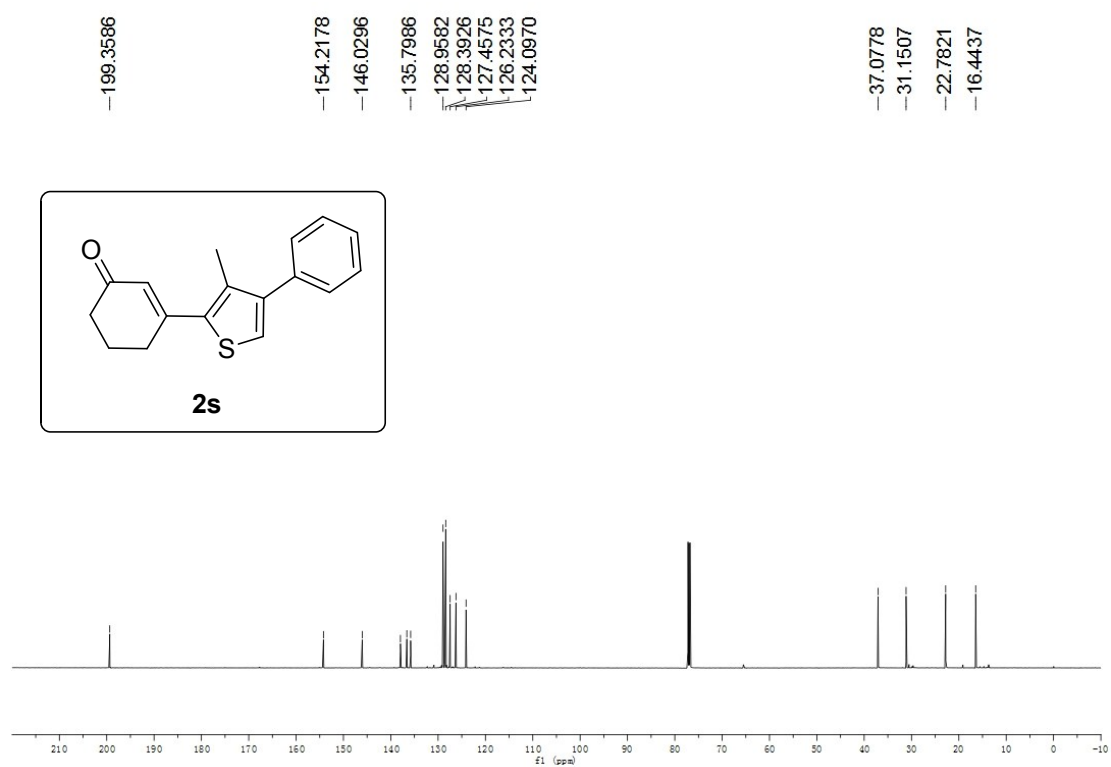

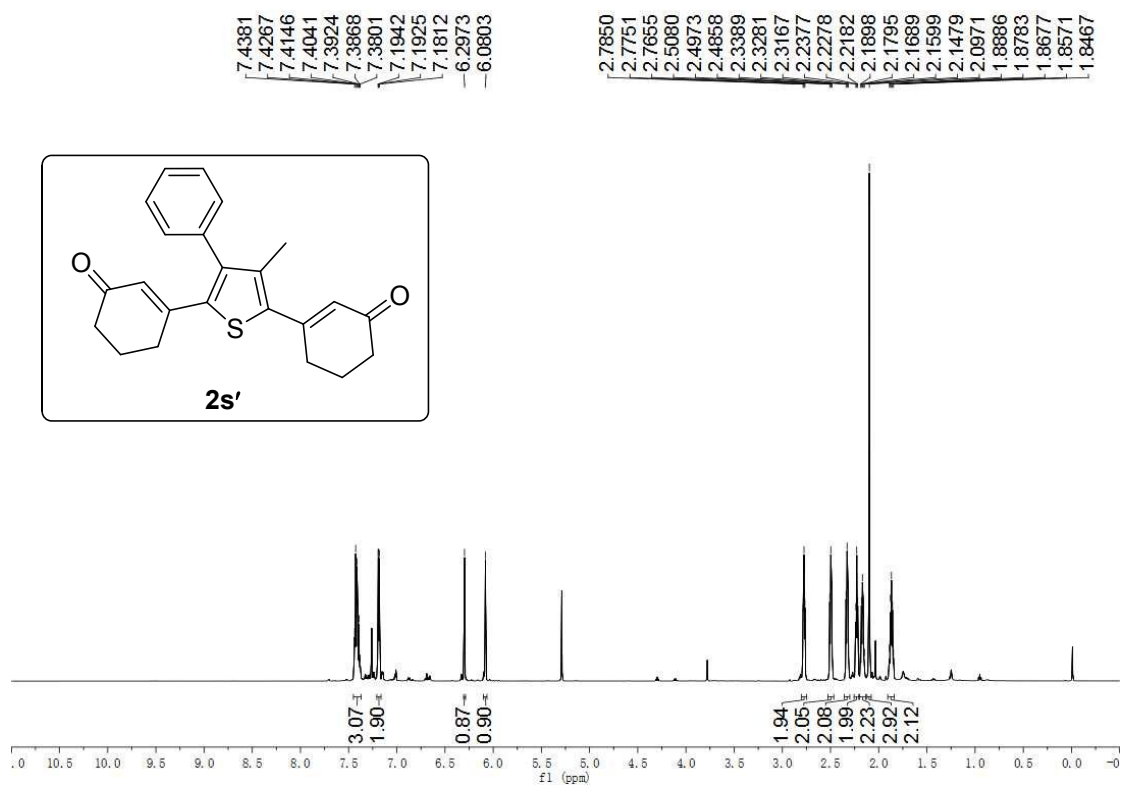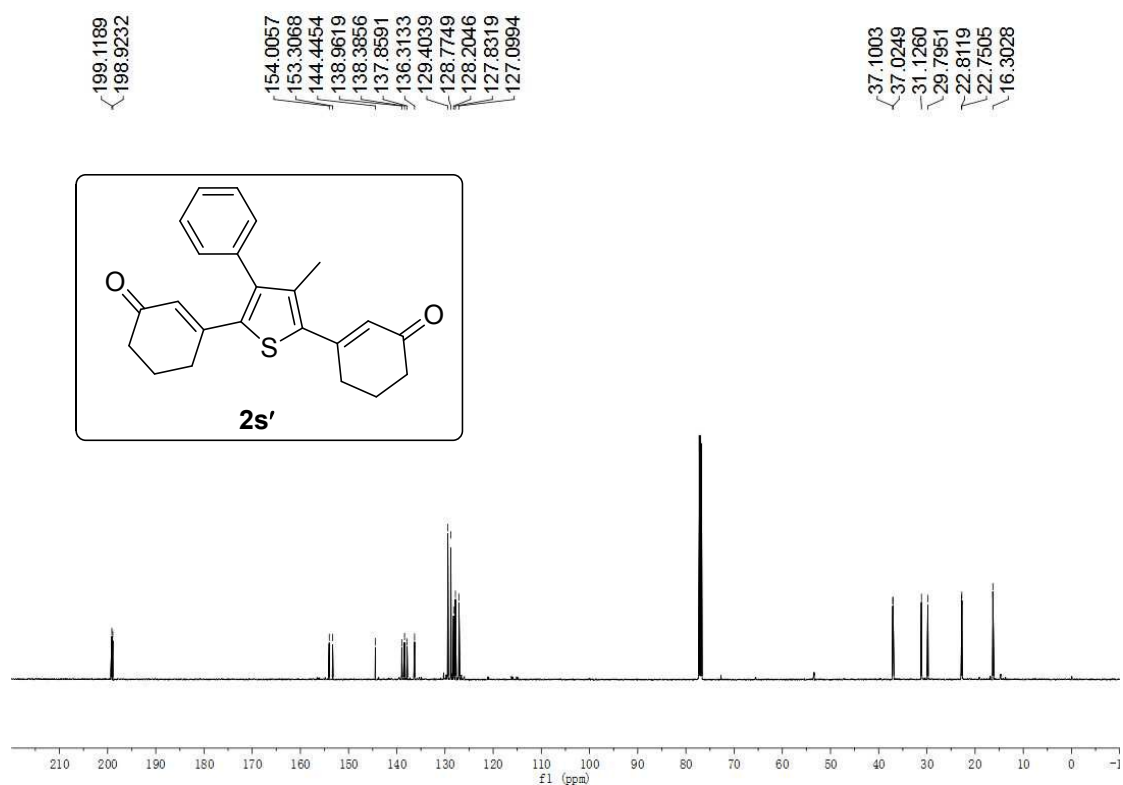

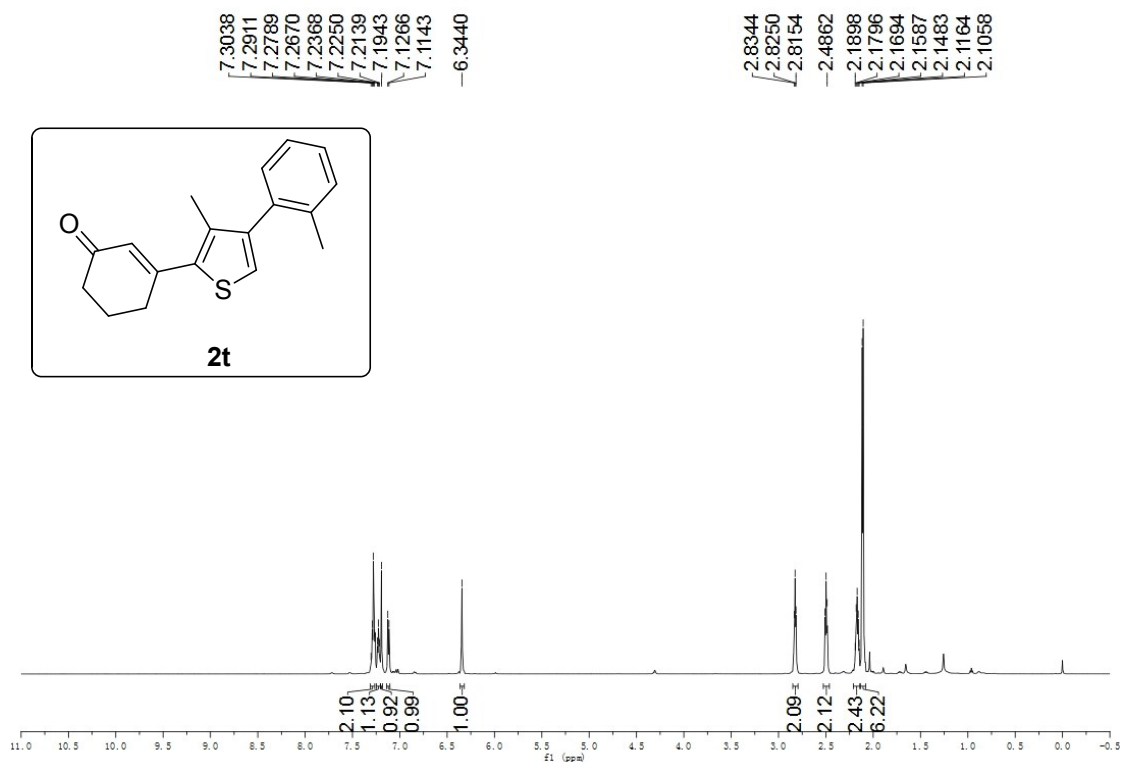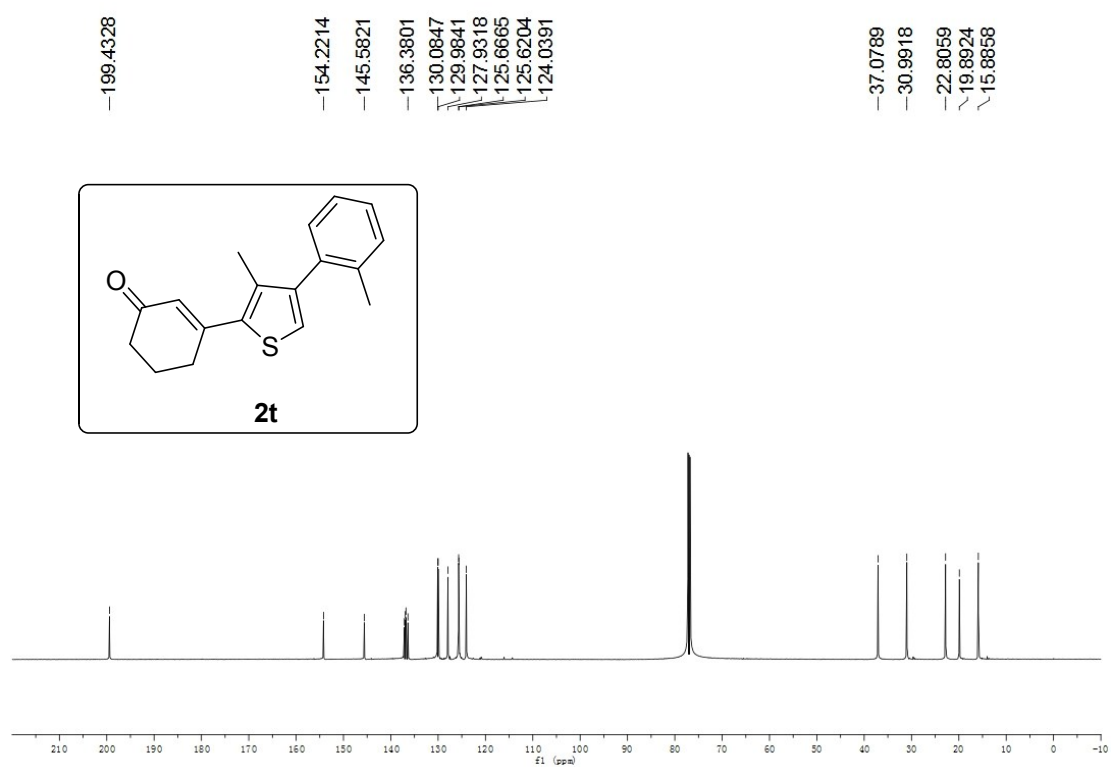

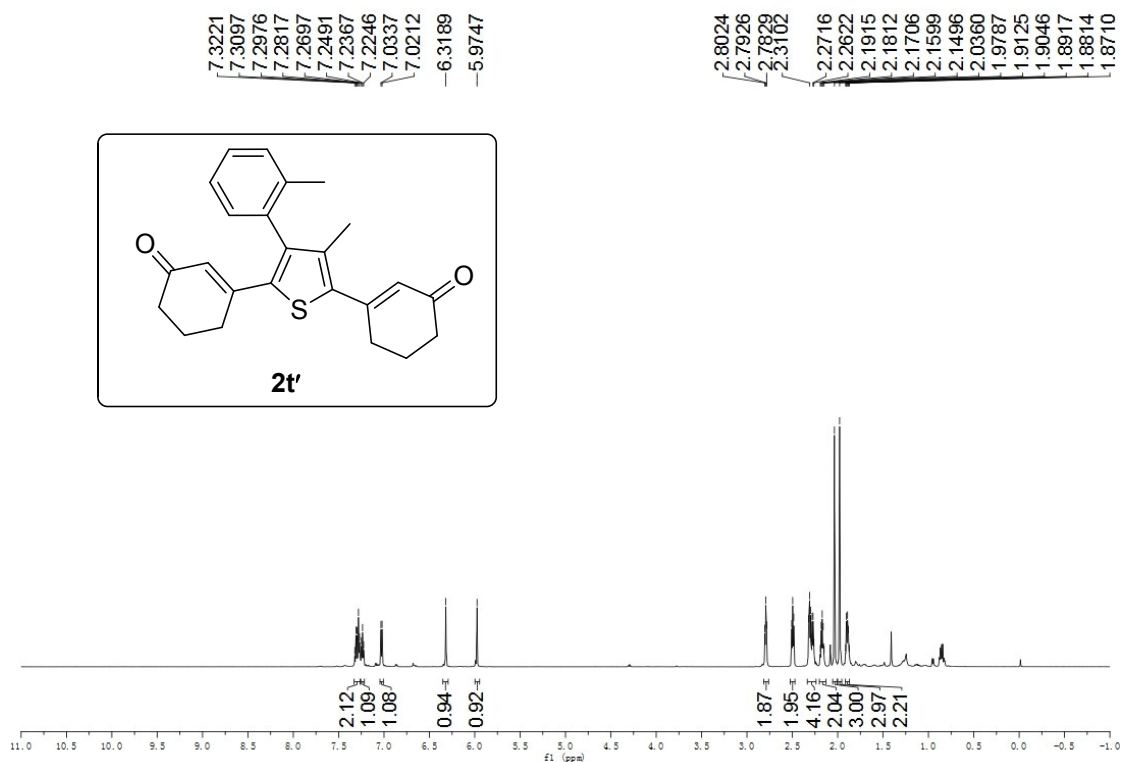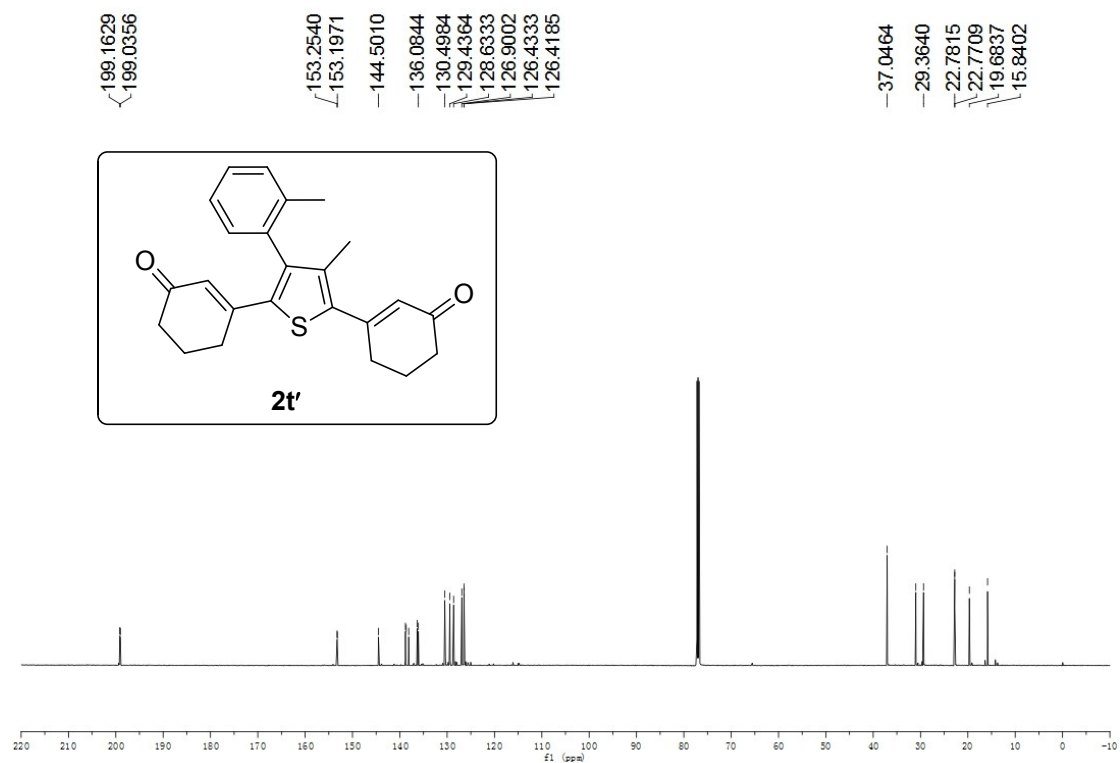

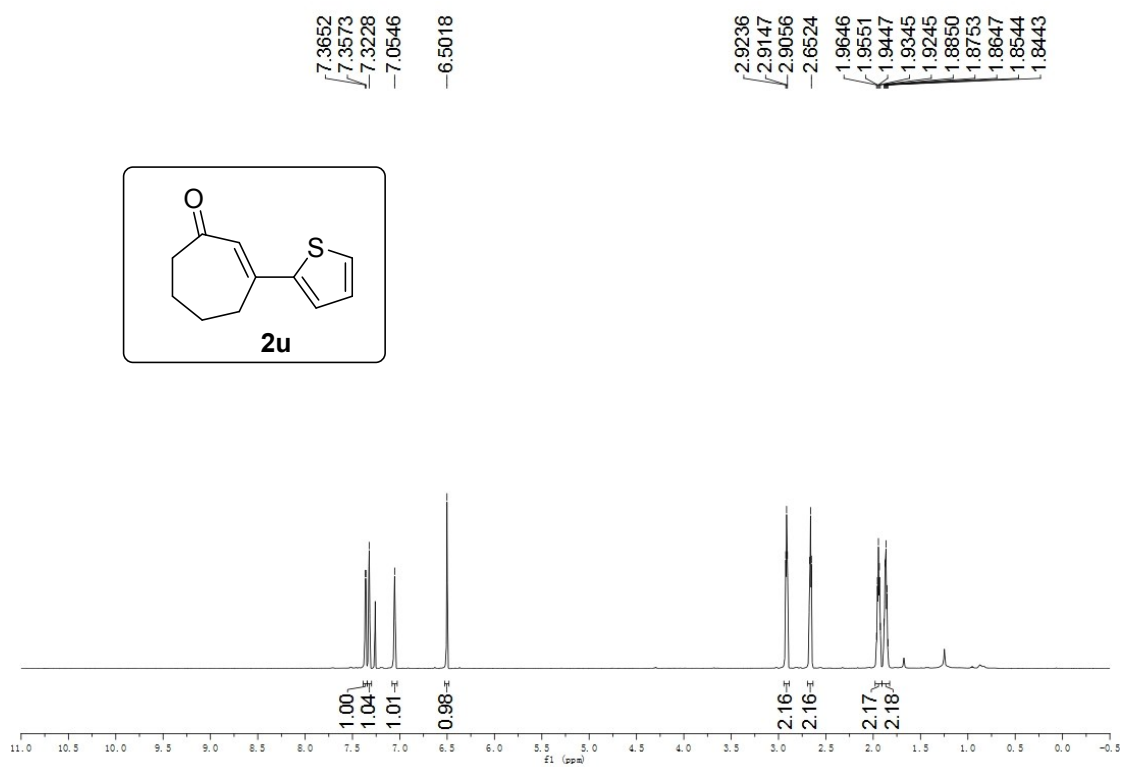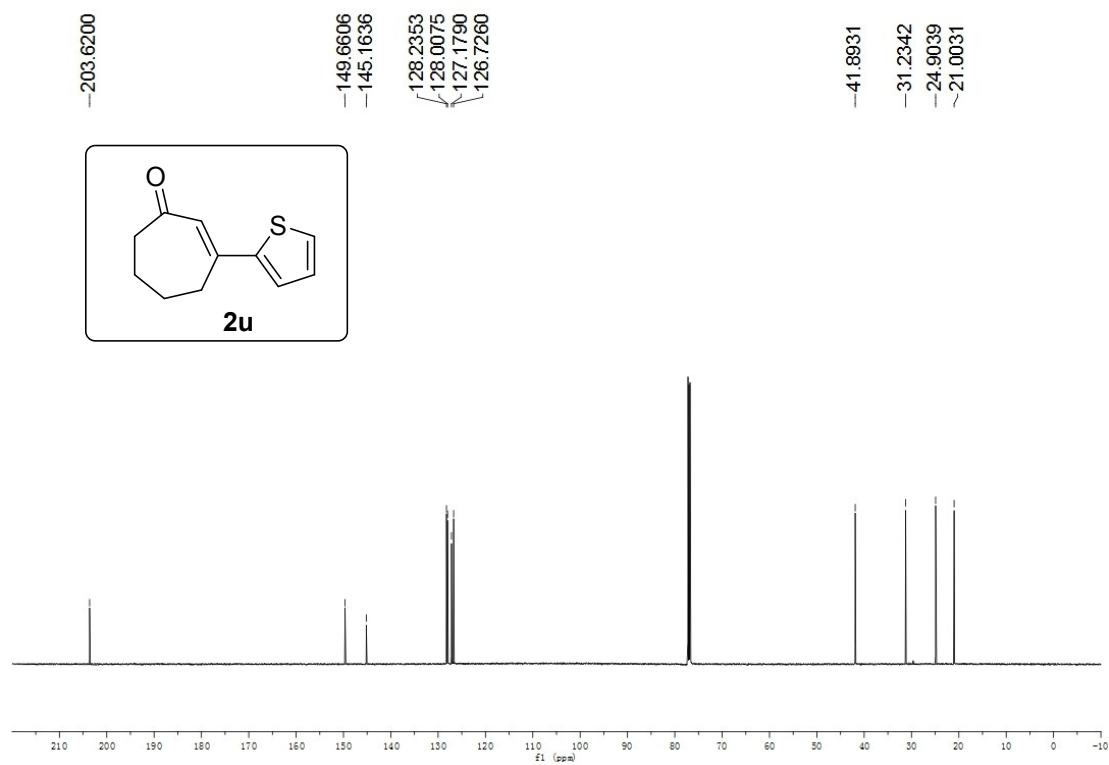

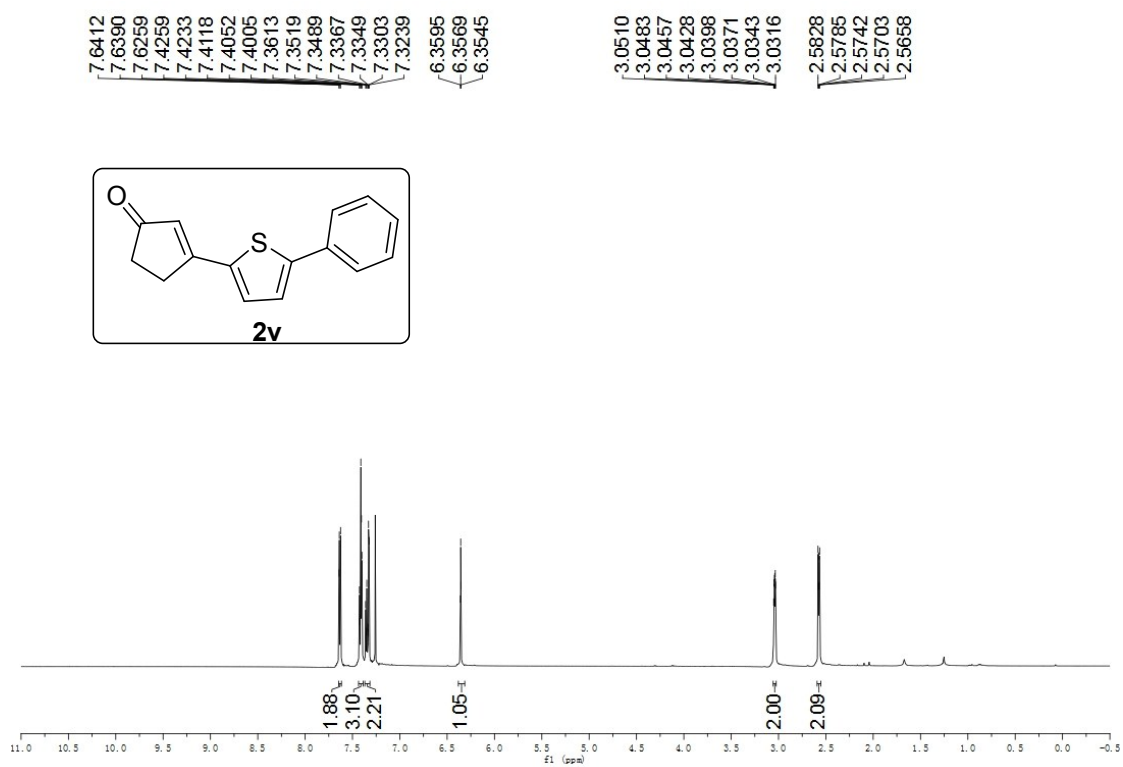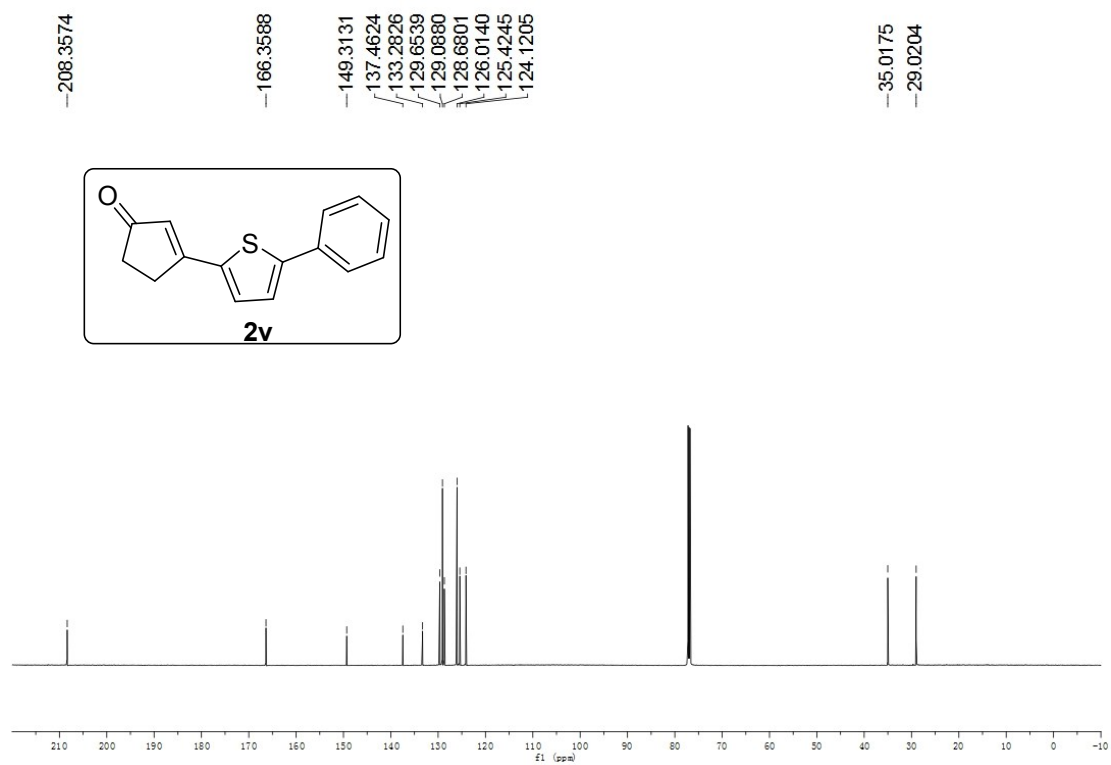



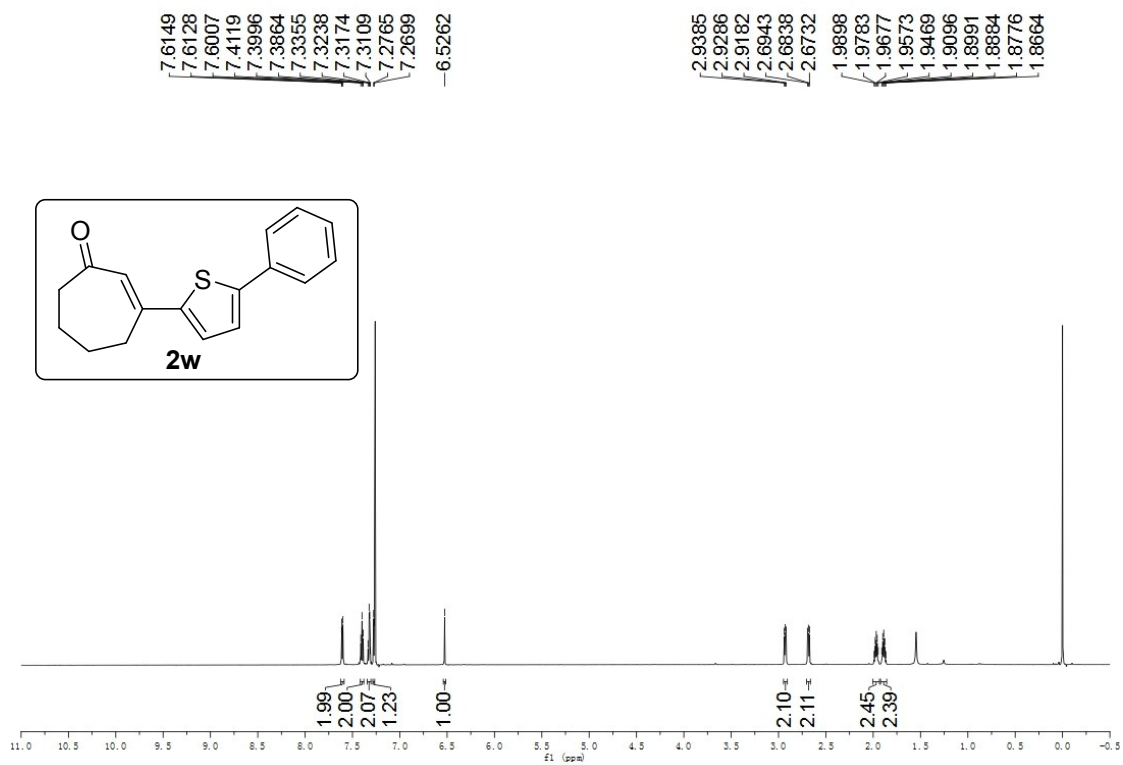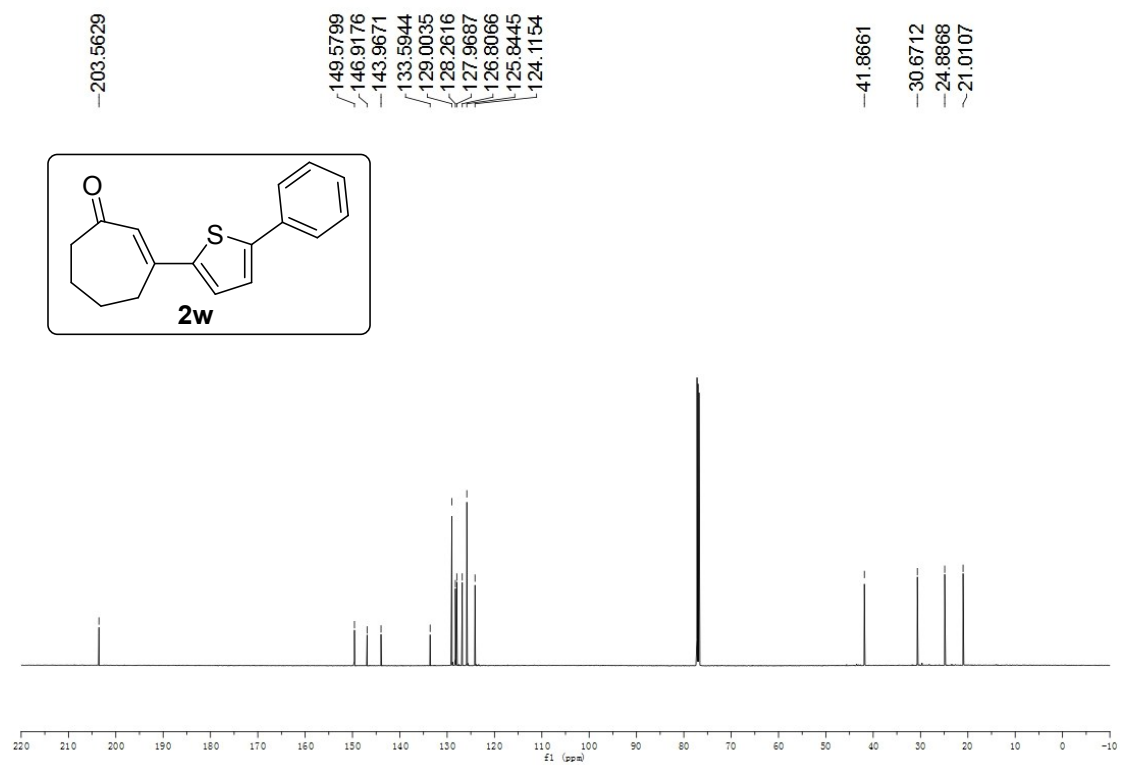

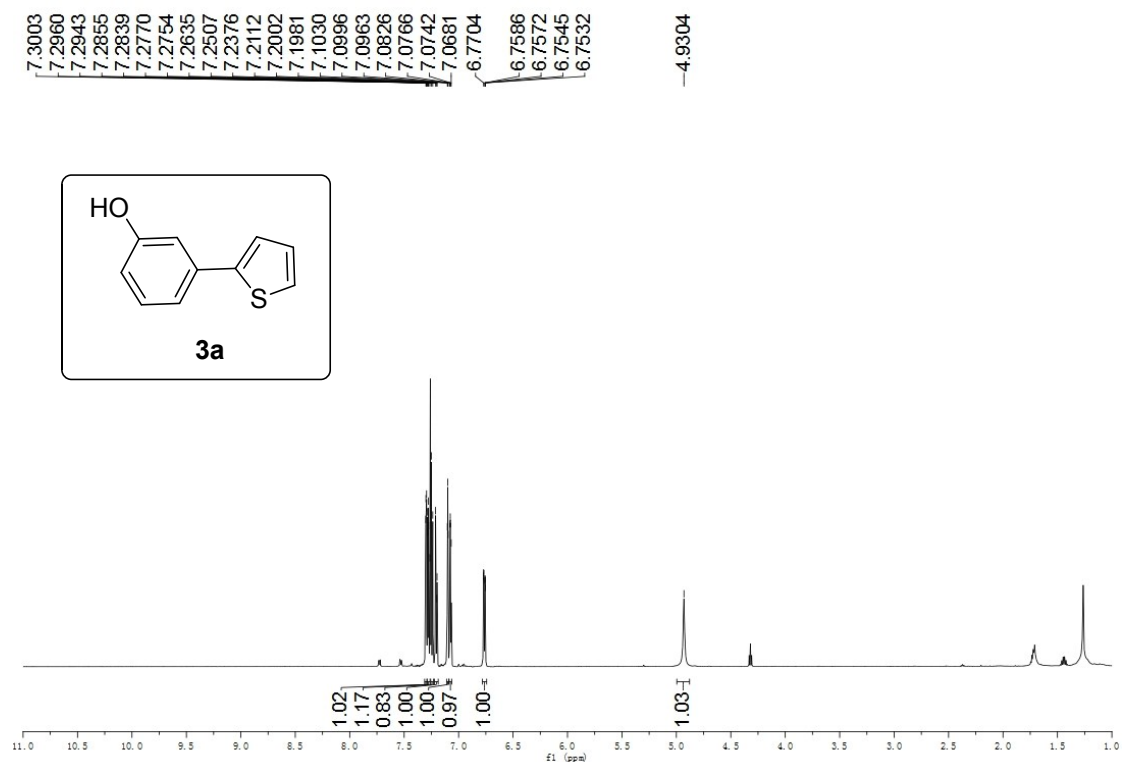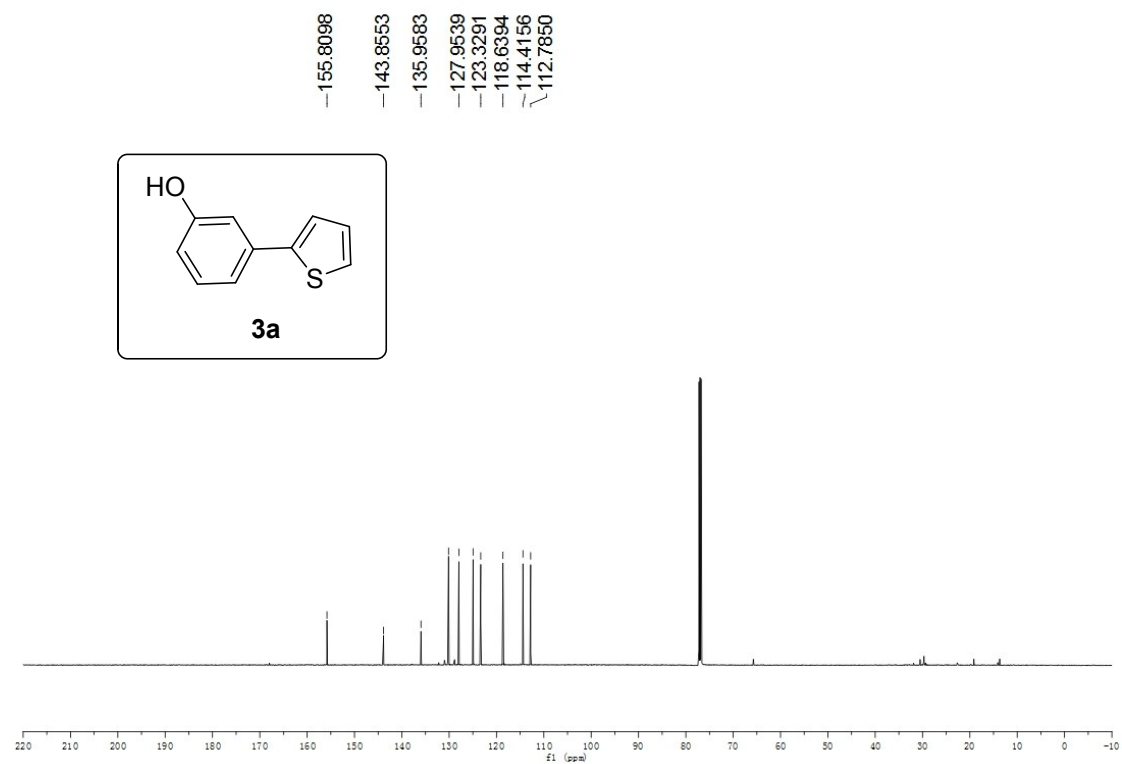

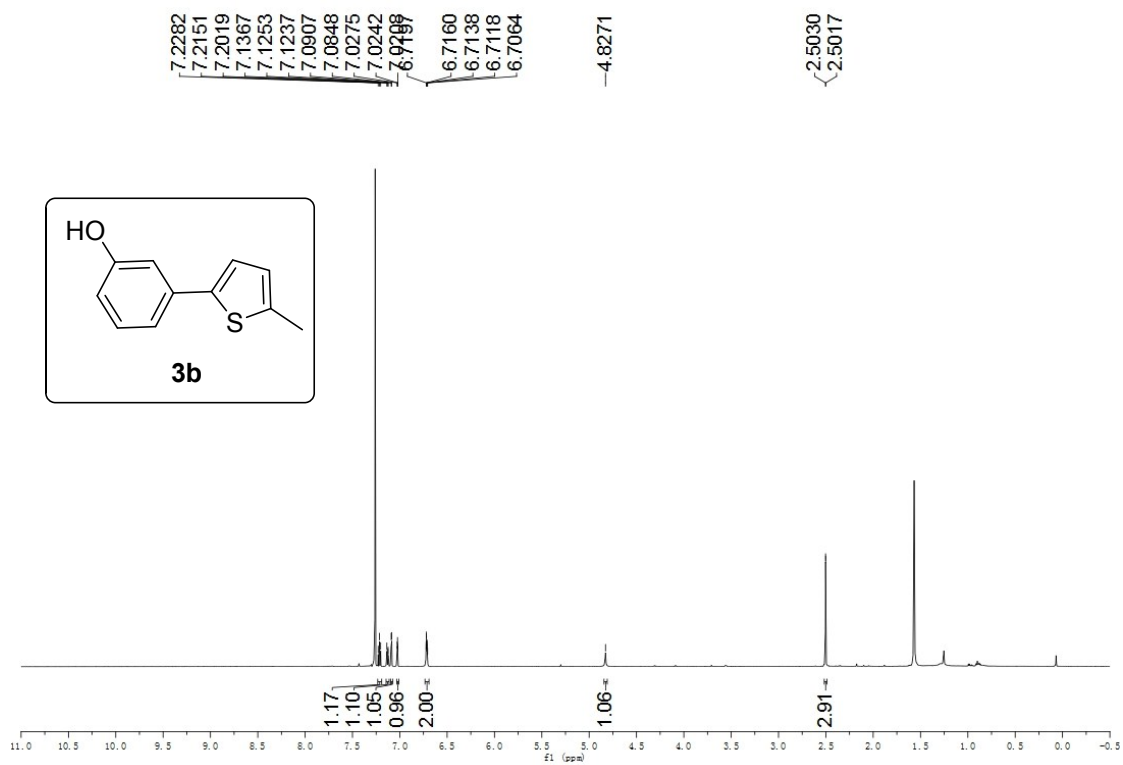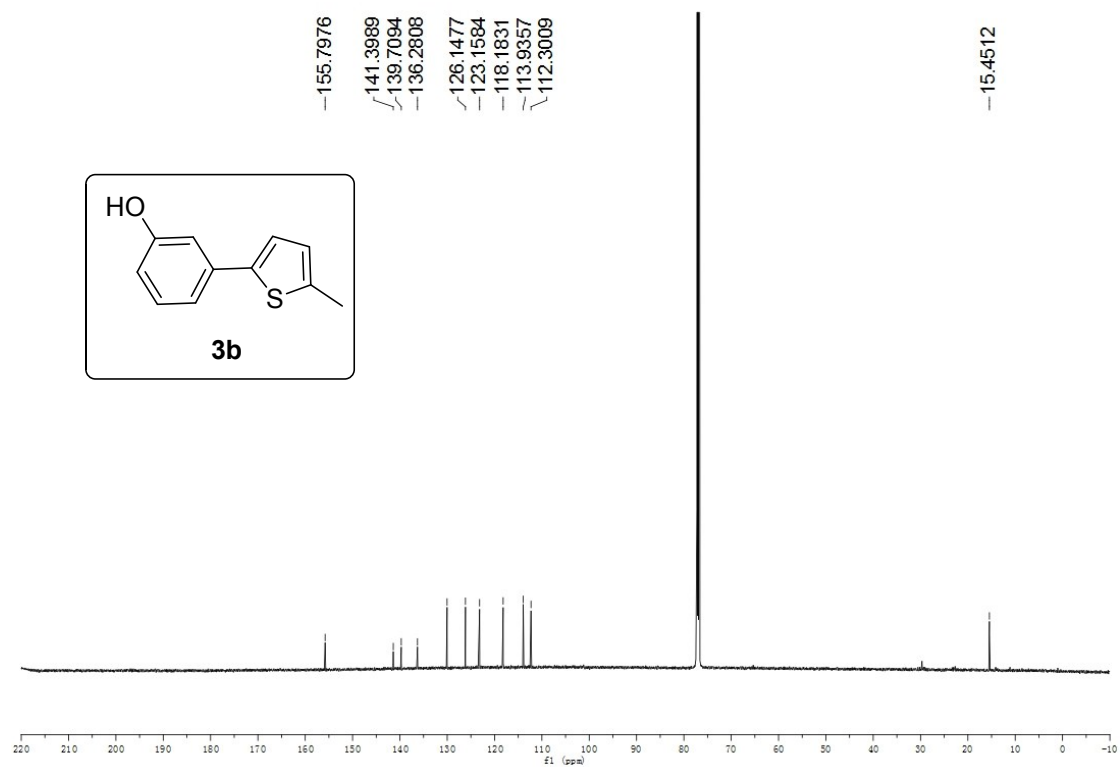

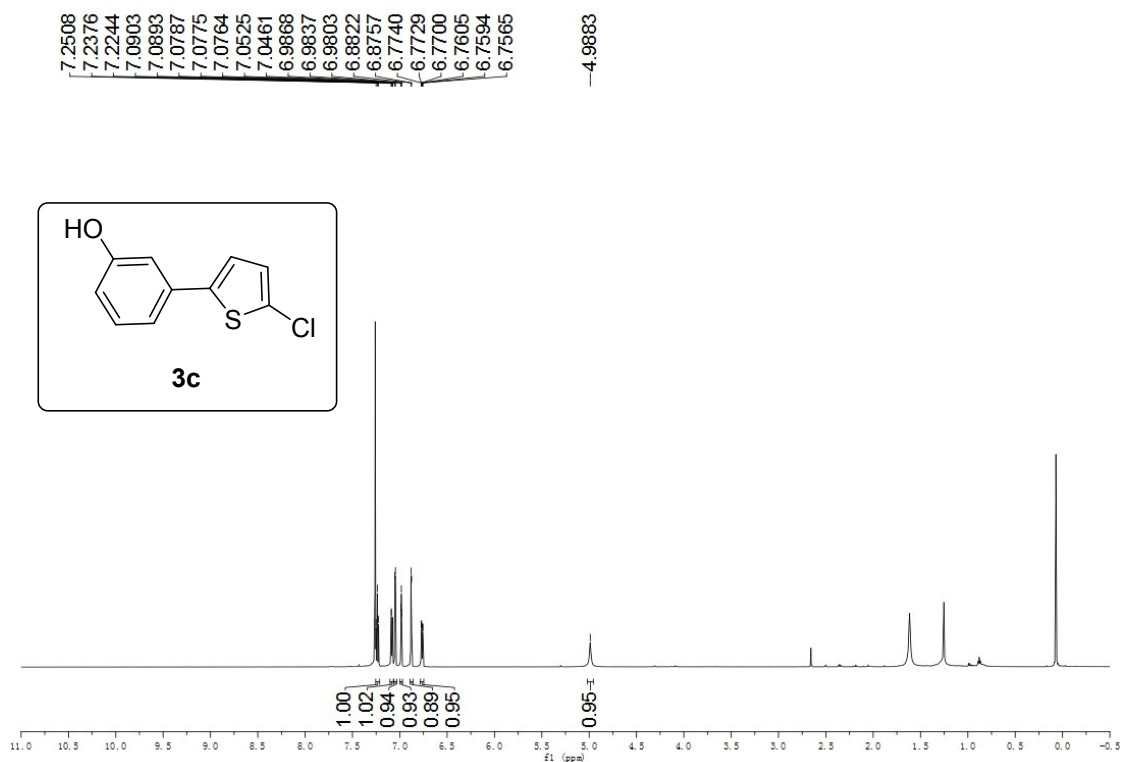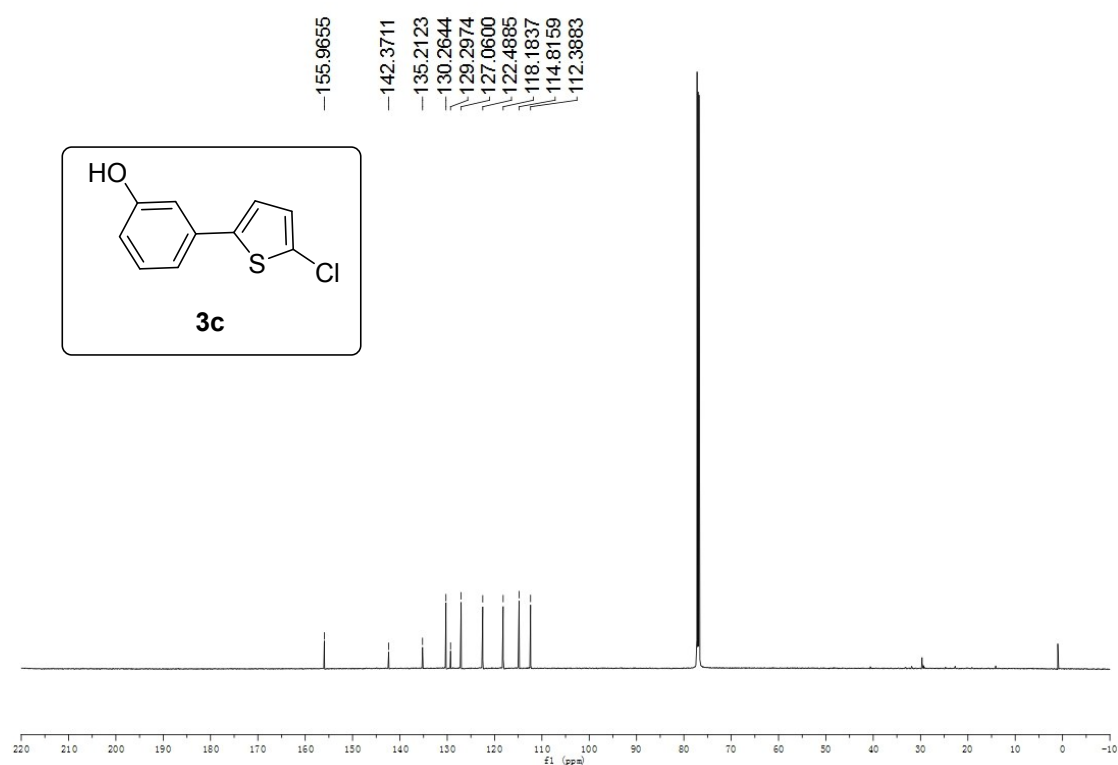

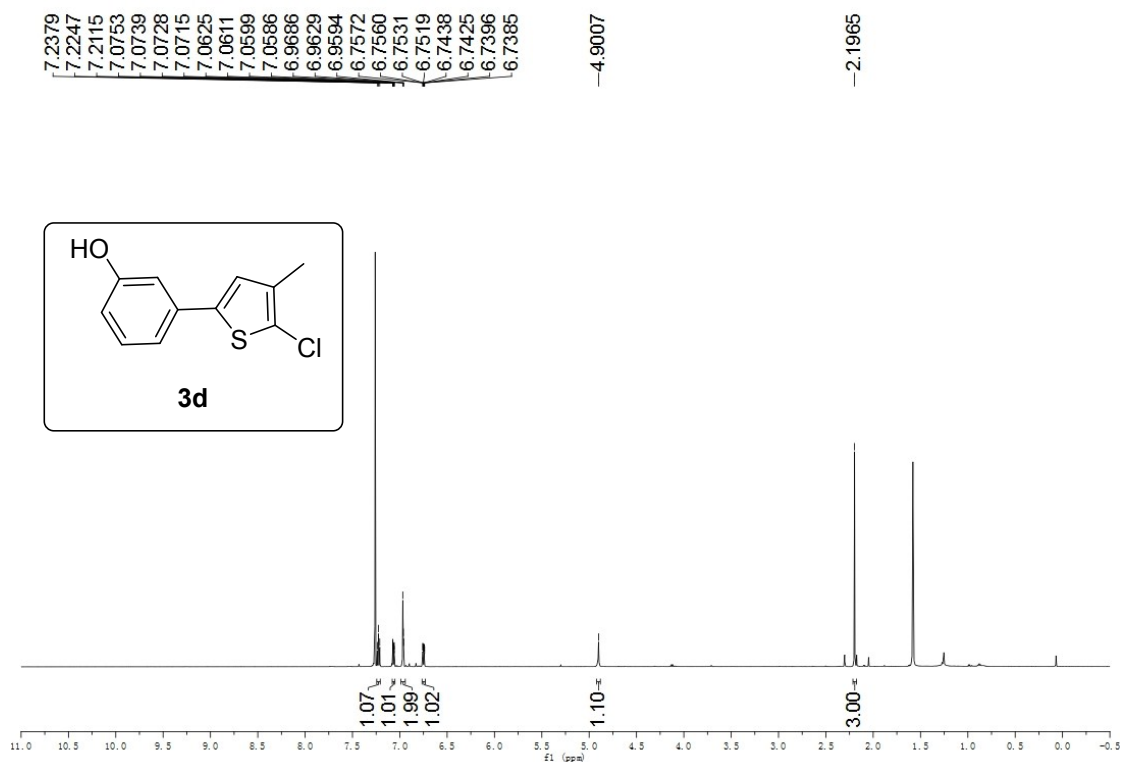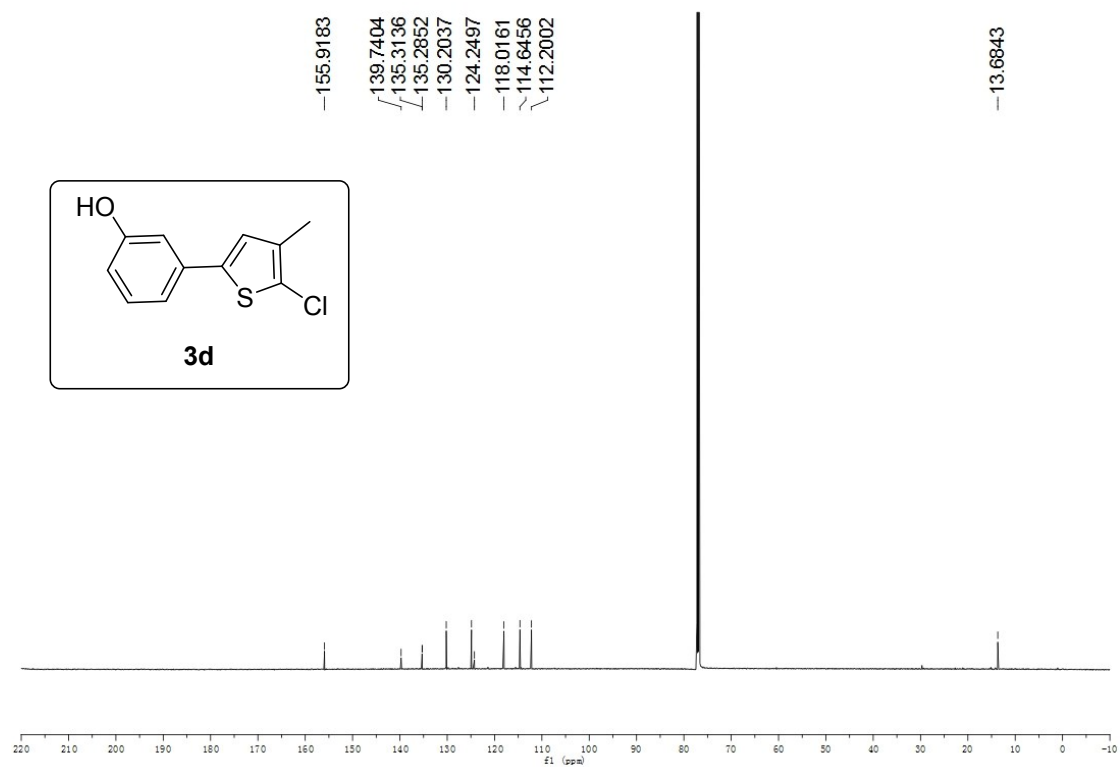

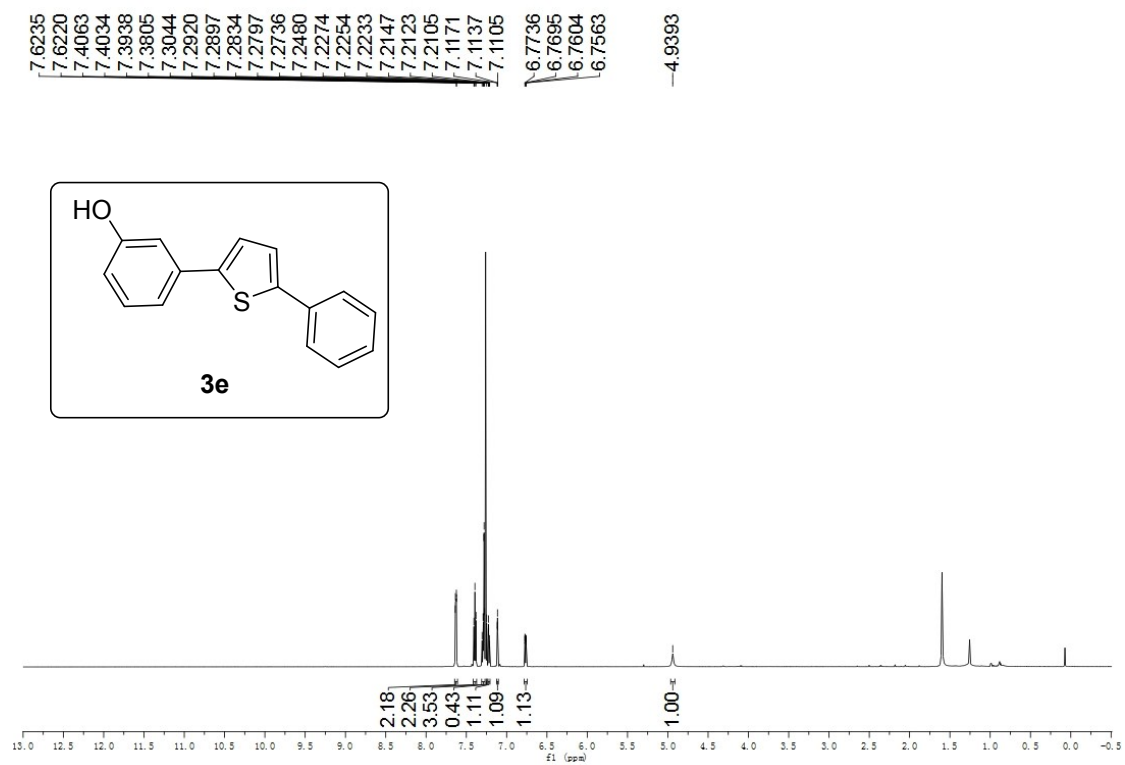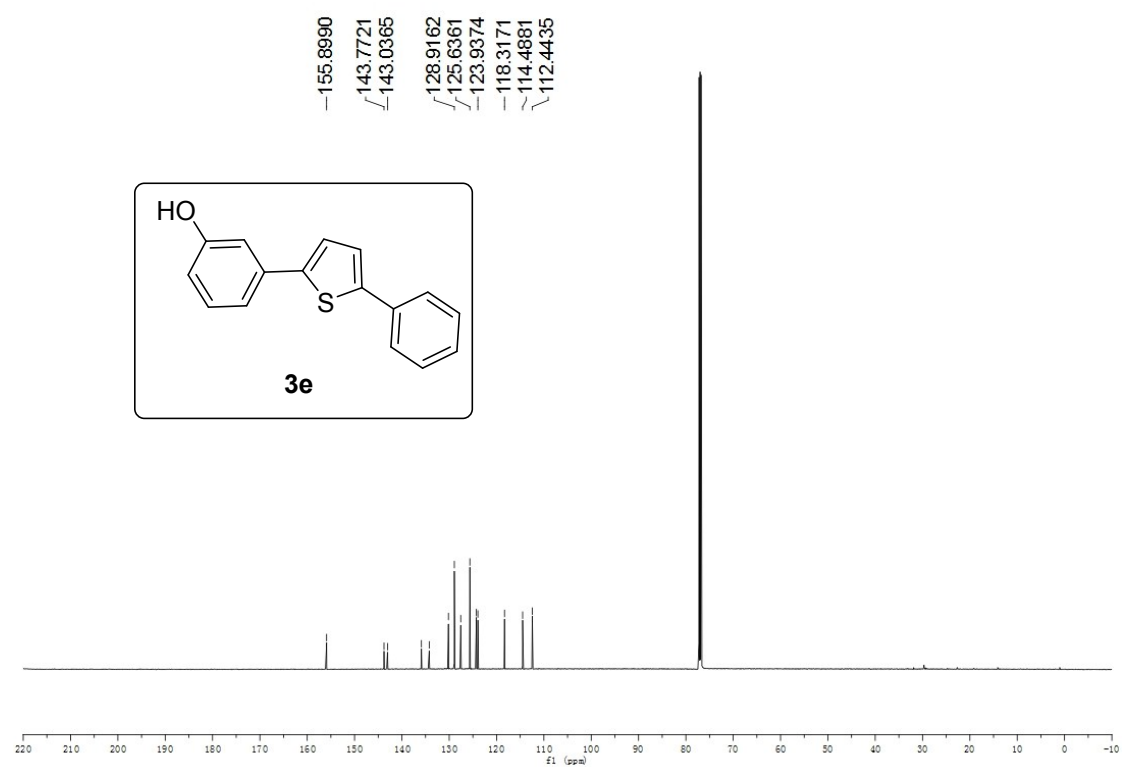

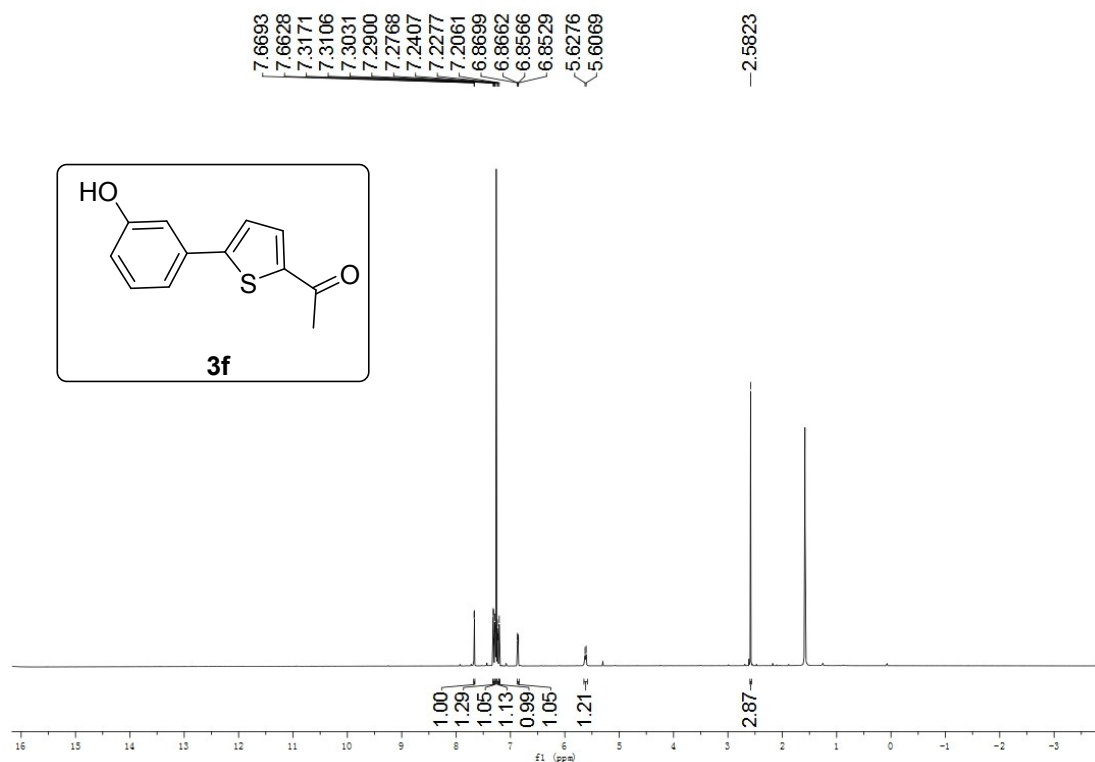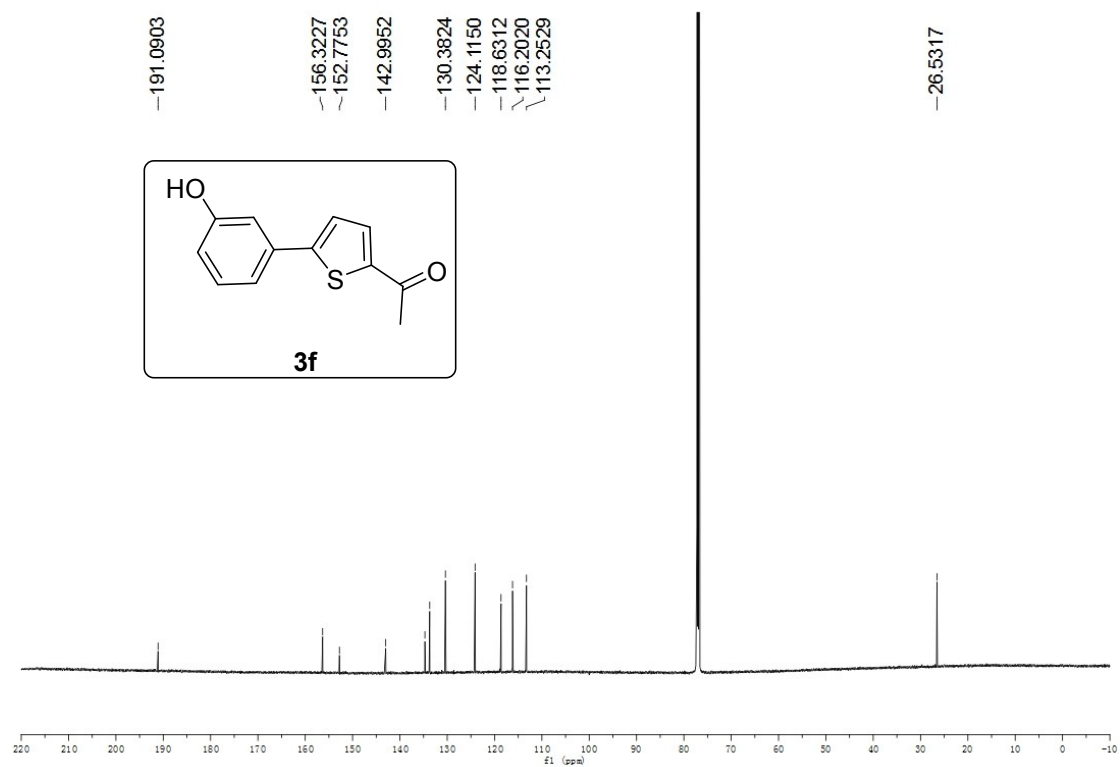

Supplement: c8cc01059e1.pdf [file c8cc01059e1.pdf]
